# Supplementary material for: Proteome and Peptidome of Vipera berus berus Venom
Source: PubMed Central journal article supplement (PMC6274168; doi:10.3390/molecules21101398), 2016-10-19
Supplement: molecules-21-01398-s001.pdf [file molecules-21-01398-s001.pdf]

# Supplementary Materials: Proteome and Peptidome of *Vipera berus berus* Venom

Aleksandra Bocian, Małgorzata Urbanik, Konrad Hus, Andrzej Łyskowski,  
Vladimír Petrilla, Zuzana Andrejčáková, Monika Petrillová and Jaroslav Legath

Selected MS and MS/MS Annotated Spectra used for Protein and Peptide Identification

Area 1. Annotated MS/MS spectrum of ion 1046.574 m/z.

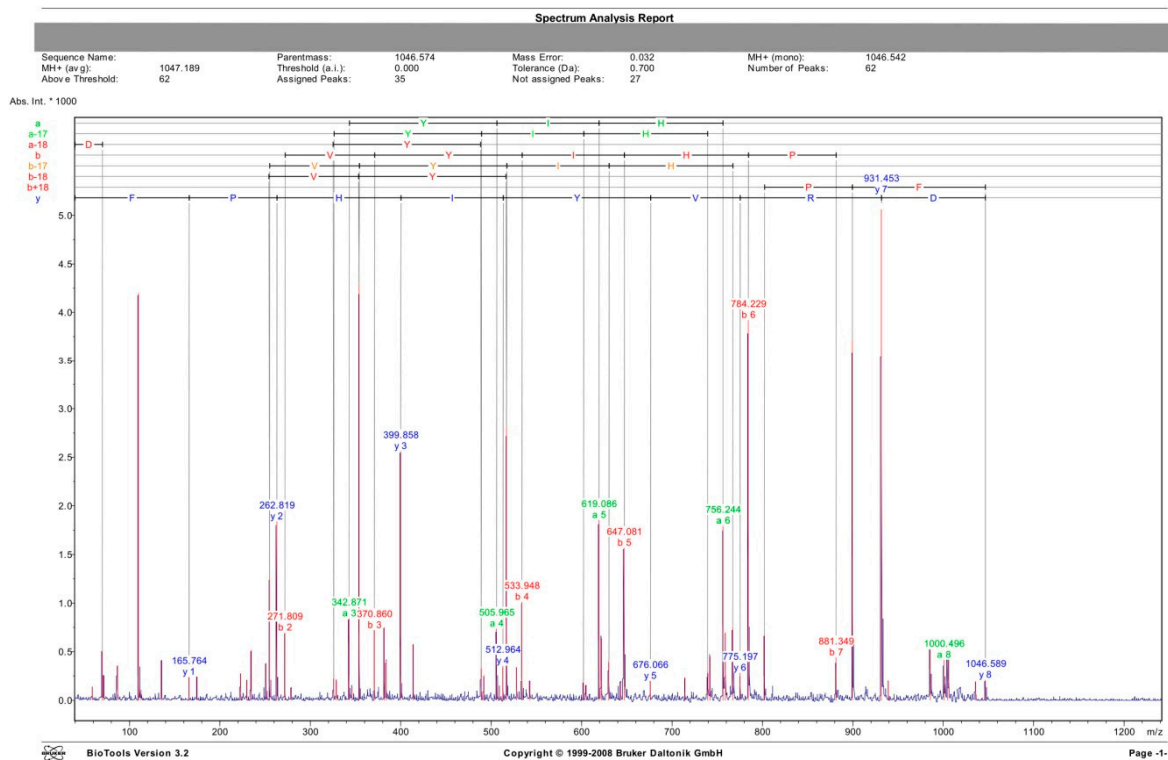

**Spectrum Analysis Report**

|                    |             |                     |             |                  |             |                  |            |          |
|--------------------|-------------|---------------------|-------------|------------------|-------------|------------------|------------|----------|
| Display Parameter: | Parentmass: | 1046.574            | Mass Error: | 0.032            | MH+ (mono): | 1046.542         | MH+ (avg): | 1047.189 |
| Threshold (a.l.):  | 0.000       | Tolerance (Da):     | 0.700       | Number of Peaks: | 62          | Above Threshold: | 62         |          |
| Assigned Peaks:    | 35          | Not assigned Peaks: | 27          |                  |             |                  |            |          |

**Peaklist:**

| Peak | Mass     | Intensity | Peak | Mass     | Intensity | Peak | Mass    | Intensity | Peak | Mass     | Intensity | Peak | Mass     | Intensity |
|------|----------|-----------|------|----------|-----------|------|---------|-----------|------|----------|-----------|------|----------|-----------|
| 1    | 58.841   | 132.159   | 2    | 69.865   | 498.245   | 3    | 71.869  | 256.271   | 4    | 86.850   | 380.129   | 5    | 109.818  | 4202.408  |
| 6    | 112.824  | 108.794   | 7    | 135.809  | 411.972   | 8    | 165.764 | 240.044   | 9    | 174.821  | 244.590   | 10   | 222.849  | 276.943   |
| 11   | 229.802  | 212.178   | 12   | 234.807  | 520.571   | 13   | 250.827 | 384.116   | 14   | 254.783  | 1256.001  | 15   | 262.819  | 1839.622  |
| 16   | 271.809  | 696.719   | 17   | 279.016  | 127.240   | 18   | 325.866 | 228.955   | 19   | 328.915  | 201.144   | 20   | 342.871  | 843.072   |
| 21   | 346.113  | 142.528   | 22   | 353.853  | 4297.906  | 23   | 370.860 | 720.896   | 24   | 381.850  | 752.246   | 25   | 383.953  | 400.974   |
| 26   | 399.858  | 2861.915  | 27   | 413.864  | 577.251   | 28   | 488.958 | 343.859   | 29   | 491.980  | 280.729   | 30   | 506.965  | 738.269   |
| 31   | 509.054  | 147.996   | 32   | 512.964  | 356.662   | 33   | 516.943 | 2808.390  | 34   | 528.238  | 341.272   | 35   | 533.948  | 1013.366  |
| 36   | 542.879  | 201.688   | 37   | 602.070  | 197.489   | 38   | 605.023 | 158.256   | 39   | 619.086  | 1853.371  | 40   | 622.068  | 637.158   |
| 41   | 630.088  | 412.111   | 42   | 643.303  | 172.112   | 43   | 647.081 | 1568.024  | 44   | 678.066  | 199.785   | 45   | 714.197  | 238.801   |
| 46   | 739.214  | 298.317   | 47   | 742.097  | 451.583   | 48   | 756.244 | 1794.773  | 49   | 758.970  | 700.023   | 50   | 767.182  | 754.570   |
| 51   | 775.197  | 282.431   | 52   | 784.229  | 3821.564  | 53   | 802.274 | 670.928   | 54   | 881.349  | 441.579   | 55   | 899.393  | 3717.282  |
| 56   | 931.453  | 5215.078  | 57   | 939.297  | 180.885   | 58   | 985.526 | 528.154   | 59   | 1000.496 | 416.983   | 60   | 1004.628 | 553.061   |
| 61   | 1035.696 | 191.849   | 62   | 1046.589 | 210.618   |      |         |           |      |          |           |      |          |           |

**Calculated Masses:**  
DRVYHPPF

| N-Term. | Ion | a               | a-17           | a-18           | b              | b-17           | b-18           | b+18            | c        | l              | x        | y               | z              | C-Term. | Ion |
|---------|-----|-----------------|----------------|----------------|----------------|----------------|----------------|-----------------|----------|----------------|----------|-----------------|----------------|---------|-----|
| 1       | D   | 68.039          | 71.013         | <b>70.029</b>  | 116.034        | 99.008         | 98.024         | 134.045         | 133.061  | 88.039         | 192.066  | <b>166.086</b>  | 149.080        | 8       | F   |
| 2       | R   | 244.140         | 227.114        | 226.130        | <b>272.135</b> | <b>255.199</b> | <b>254.125</b> | 290.146         | 289.162  | 129.113        | 289.116  | <b>263.139</b>  | 246.112        | 7       | P   |
| 3       | V   | <b>343.209</b>  | <b>326.182</b> | <b>325.198</b> | 371.204        | <b>354.177</b> | <b>353.193</b> | 389.214         | 388.230  | <b>72.081</b>  | 406.177  | <b>400.198</b>  | 383.171        | 6       | H   |
| 4       | Y   | <b>506.272</b>  | <b>489.246</b> | <b>488.262</b> | <b>534.267</b> | <b>517.241</b> | <b>516.257</b> | 552.278         | 551.294  | <b>136.076</b> | 539.261  | <b>513.282</b>  | 496.255        | 5       | I   |
| 5       | I   | <b>619.356</b>  | <b>602.330</b> | 601.346        | <b>647.351</b> | <b>630.325</b> | 629.341        | 665.362         | 664.378  | 86.095         | 702.325  | <b>676.345</b>  | 659.319        | 4       | V   |
| 6       | H   | <b>756.415</b>  | <b>739.389</b> | 738.405        | <b>784.410</b> | <b>767.383</b> | 766.399        | <b>802.421</b>  | 801.437  | <b>110.071</b> | 801.383  | <b>775.414</b>  | <b>758.387</b> | 3       | V   |
| 7       | P   | 853.468         | 836.441        | 835.457        | <b>881.463</b> | 864.436        | 863.452        | <b>899.473</b>  | 898.489  | <b>70.065</b>  | 957.494  | <b>931.515</b>  | 914.488        | 2       | R   |
| 8       | F   | <b>1000.536</b> | 983.510        | 982.526        | 1028.531       | 1011.505       | 1010.521       | <b>1046.542</b> | 1045.558 | 120.081        | 1072.521 | <b>1046.542</b> | 1029.515       | 1       | D   |

BioTools Version 3.2 Copyright © 1999-2008 Bruker Daltonik GmbH Page -2-

Area 1. Annotated MS/MS spectrum of ion 1046.574 m/z.

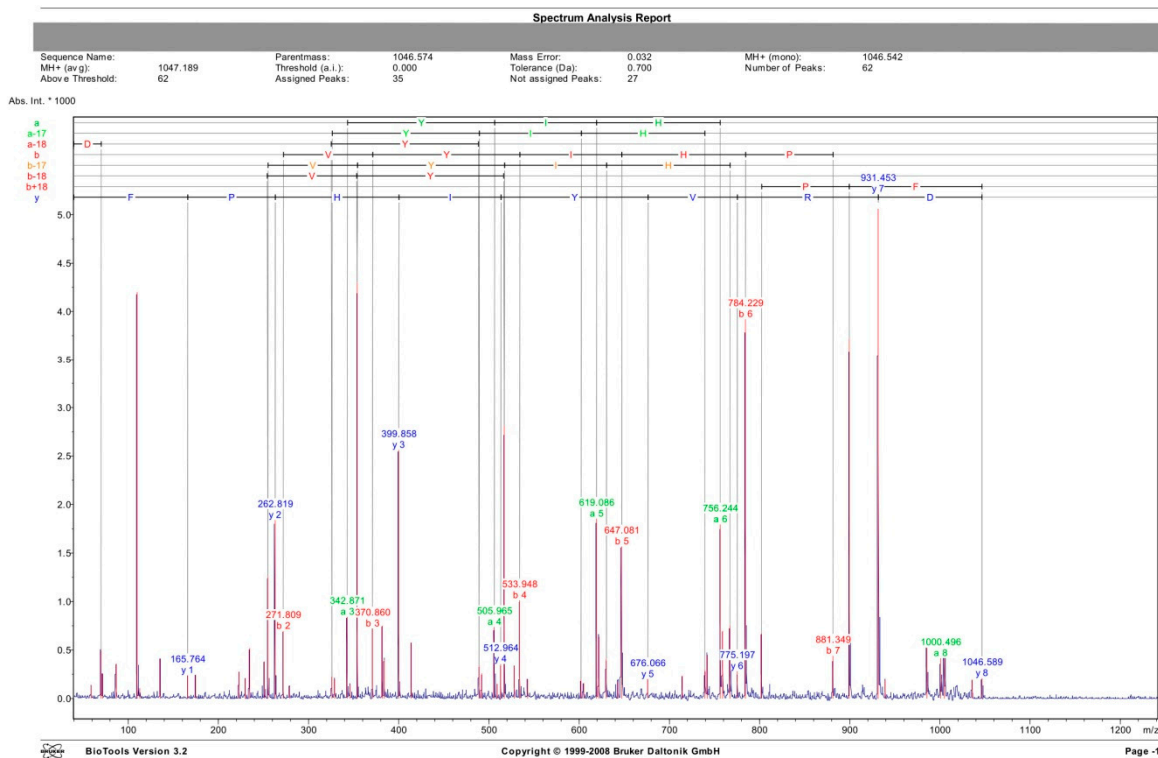

**Spectrum Analysis Report**

**Display Parameter:**

|                   |          |                     |       |                  |          |                  |          |
|-------------------|----------|---------------------|-------|------------------|----------|------------------|----------|
| Parentmass:       | 1046.574 | Mass Error:         | 0.032 | MH+ (mono):      | 1046.542 | MH+ (avg):       | 1047.189 |
| Threshold (a.i.): | 0.000    | Tolerance (Da):     | 0.700 | Number of Peaks: | 62       | Above Threshold: | 62       |
| Assigned Peaks:   | 35       | Not assigned Peaks: | 27    |                  |          |                  |          |

**Peaklist:**

| Peak | Mass     | Intensity | Peak | Mass     | Intensity | Peak | Mass    | Intensity | Peak | Mass     | Intensity | Peak | Mass     | Intensity |
|------|----------|-----------|------|----------|-----------|------|---------|-----------|------|----------|-----------|------|----------|-----------|
| 1    | 58.841   | 132.159   | 2    | 69.865   | 498.245   | 3    | 71.869  | 256.271   | 4    | 86.850   | 360.129   | 5    | 109.818  | 4202.408  |
| 6    | 112.824  | 108.794   | 7    | 135.809  | 411.972   | 8    | 165.764 | 240.044   | 9    | 174.821  | 244.590   | 10   | 222.849  | 278.943   |
| 11   | 229.802  | 212.178   | 12   | 234.807  | 520.571   | 13   | 250.827 | 384.118   | 14   | 254.793  | 1256.001  | 15   | 262.819  | 1839.622  |
| 16   | 271.809  | 696.719   | 17   | 279.016  | 127.240   | 18   | 325.866 | 228.955   | 19   | 328.915  | 201.144   | 20   | 342.871  | 843.072   |
| 21   | 348.113  | 142.528   | 22   | 353.853  | 4291.906  | 23   | 370.860 | 720.696   | 24   | 381.850  | 732.246   | 25   | 383.953  | 400.374   |
| 26   | 399.858  | 2561.915  | 27   | 413.884  | 577.251   | 28   | 488.958 | 343.859   | 29   | 491.980  | 260.729   | 30   | 505.965  | 738.269   |
| 31   | 509.054  | 147.996   | 32   | 512.964  | 356.662   | 33   | 516.943 | 2808.390  | 34   | 528.238  | 341.272   | 35   | 533.948  | 1013.366  |
| 36   | 542.879  | 201.688   | 37   | 602.070  | 197.489   | 38   | 605.023 | 158.256   | 39   | 610.086  | 1853.371  | 40   | 622.068  | 637.158   |
| 41   | 630.068  | 412.111   | 42   | 643.303  | 172.112   | 43   | 647.061 | 1568.024  | 44   | 676.066  | 199.785   | 45   | 714.197  | 238.801   |
| 46   | 739.214  | 298.317   | 47   | 742.097  | 451.583   | 48   | 756.244 | 1794.773  | 49   | 758.970  | 700.023   | 50   | 767.182  | 754.870   |
| 51   | 775.197  | 282.431   | 52   | 784.229  | 3921.564  | 53   | 802.274 | 670.928   | 54   | 861.349  | 441.576   | 55   | 899.393  | 3712.292  |
| 56   | 931.453  | 5215.078  | 57   | 939.297  | 190.885   | 58   | 985.525 | 525.154   | 59   | 1000.496 | 416.983   | 60   | 1004.629 | 553.061   |
| 61   | 1035.696 | 191.849   | 62   | 1046.589 | 210.618   |      |         |           |      |          |           |      |          |           |

**Calculated Masses:**  
DRVYHFP

| N-Term | Ion | a               | a-17           | a-18           | b              | b-17           | b-18           | b+18            | c        | i              | x        | y               | z              | C-Term | Ion |
|--------|-----|-----------------|----------------|----------------|----------------|----------------|----------------|-----------------|----------|----------------|----------|-----------------|----------------|--------|-----|
| 1      | D   | 88.039          | 71.013         | <b>70.029</b>  | 116.034        | 99.008         | 98.024         | 134.045         | 133.061  | 88.039         | 192.066  | <b>166.086</b>  | 149.060        | 8      | F   |
| 2      | R   | 244.140         | 227.114        | 225.130        | <b>272.135</b> | <b>255.109</b> | <b>254.125</b> | 290.148         | 289.162  | 129.113        | 289.118  | <b>283.139</b>  | 245.112        | 7      | P   |
| 3      | V   | <b>343.209</b>  | <b>326.182</b> | <b>325.198</b> | <b>371.204</b> | <b>354.177</b> | <b>353.193</b> | 389.214         | 388.230  | <b>72.081</b>  | 426.177  | <b>400.198</b>  | 383.171        | 6      | H   |
| 4      | Y   | <b>506.272</b>  | <b>489.246</b> | <b>488.262</b> | <b>534.267</b> | <b>517.241</b> | <b>516.257</b> | 552.278         | 551.294  | <b>136.076</b> | 539.261  | <b>513.282</b>  | 496.255        | 5      | I   |
| 5      | I   | <b>619.356</b>  | <b>602.330</b> | 601.346        | <b>647.351</b> | <b>630.325</b> | 629.341        | 665.362         | 664.378  | 85.061         | 702.325  | <b>678.345</b>  | 659.319        | 4      | V   |
| 6      | H   | <b>756.415</b>  | <b>739.389</b> | 738.405        | <b>784.410</b> | <b>767.383</b> | 766.399        | <b>802.421</b>  | 801.437  | <b>110.071</b> | 801.393  | <b>775.414</b>  | <b>758.387</b> | 3      | V   |
| 7      | P   | 853.468         | 836.441        | 835.457        | <b>881.463</b> | 864.436        | 863.452        | <b>899.473</b>  | 898.489  | <b>70.065</b>  | 957.494  | <b>931.515</b>  | 914.488        | 2      | R   |
| 8      | F   | <b>1000.536</b> | 983.510        | 982.526        | 1028.531       | 1011.505       | 1010.521       | <b>1046.542</b> | 1045.558 | 120.051        | 1072.521 | <b>1046.542</b> | 1029.515       | 1      | D   |

BioTools Version 3.2 Copyright © 1999-2008 Bruker Daltonik GmbH Page -2-

Area 2. Annotated MS/MS spectrum of ion 1311.723 m/z.

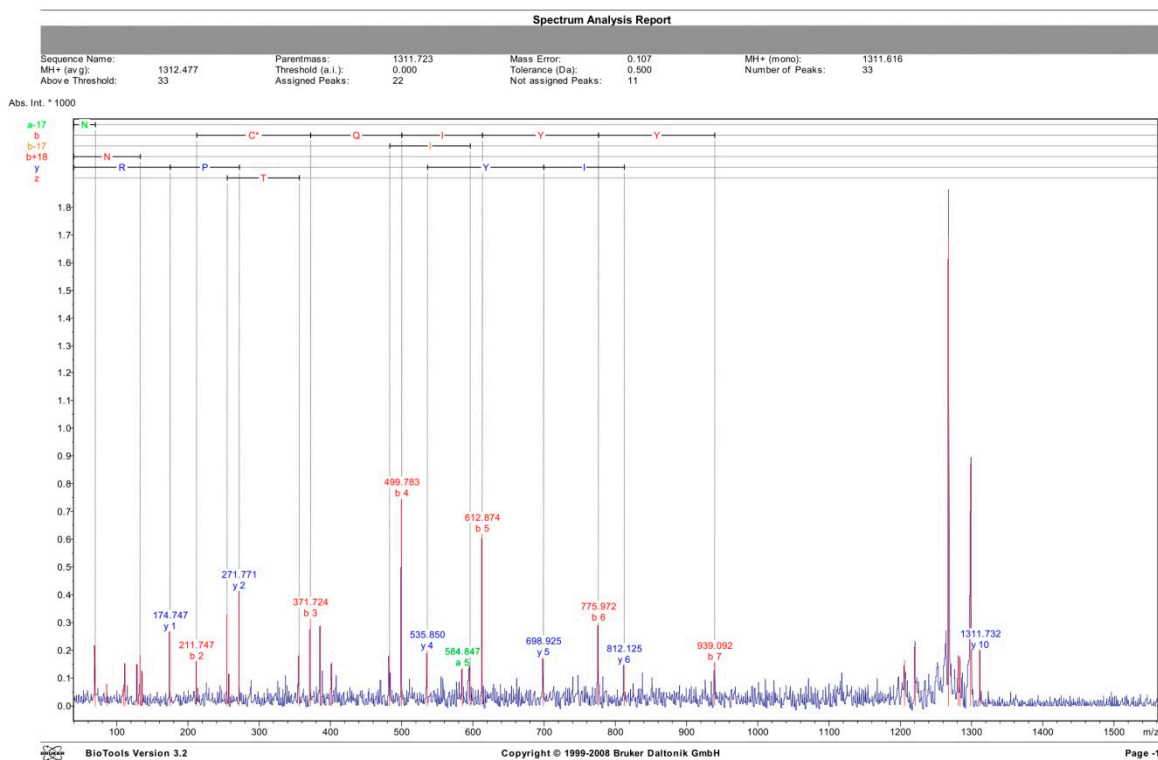

**Spectrum Analysis Report**

**Display Parameter:**

|                   |          |                     |       |                  |          |                  |          |
|-------------------|----------|---------------------|-------|------------------|----------|------------------|----------|
| Parentmass:       | 1311.723 | Mass Error:         | 0.107 | MH+ (mono):      | 1311.616 | MH+ (avg):       | 1312.477 |
| Threshold (a.i.): | 0.000    | Tolerance (Da):     | 0.500 | Number of Peaks: | 33       | Above Threshold: | 33       |
| Assigned Peaks:   | 22       | Not assigned Peaks: | 11    |                  |          |                  |          |

**Peaklist:**

| Peak | Mass     | Intensity | Peak | Mass     | Intensity | Peak | Mass     | Intensity | Peak | Mass     | Intensity | Peak | Mass     | Intensity |
|------|----------|-----------|------|----------|-----------|------|----------|-----------|------|----------|-----------|------|----------|-----------|
| 1    | 69.928   | 221.927   | 2    | 85.806   | 79.441    | 3    | 109.711  | 75.361    | 4    | 111.788  | 149.492   | 5    | 126.783  | 150.830   |
| 6    | 132.713  | 179.870   | 7    | 135.737  | 119.601   | 8    | 174.747  | 267.735   | 9    | 211.747  | 150.403   | 10   | 254.741  | 331.830   |
| 11   | 257.697  | 115.933   | 12   | 271.771  | 414.368   | 13   | 355.763  | 188.594   | 14   | 371.724  | 314.998   | 15   | 385.741  | 289.759   |
| 16   | 401.811  | 157.259   | 17   | 482.749  | 186.716   | 18   | 499.783  | 747.129   | 19   | 535.850  | 198.157   | 20   | 584.847  | 137.353   |
| 21   | 595.894  | 136.118   | 22   | 612.874  | 618.606   | 23   | 698.925  | 175.176   | 24   | 775.972  | 239.355   | 25   | 812.125  | 147.509   |
| 26   | 939.092  | 158.080   | 27   | 1205.820 | 164.722   | 28   | 1220.642 | 208.929   | 29   | 1267.723 | 1694.006  | 30   | 1281.290 | 178.477   |
| 31   | 1283.834 | 165.243   | 32   | 1298.428 | 870.607   | 33   | 1311.732 | 200.803   |      |          |           |      |          |           |

**Calculated Masses:**  
NPCQIYYTPR 3: Carbamidomethyl (C)

| N-Term. | Ion | a              | a-17          | a-18     | b              | b-17           | b-18     | b+18            | c        | l              | x        | y               | z              | C-Term. | Ion |
|---------|-----|----------------|---------------|----------|----------------|----------------|----------|-----------------|----------|----------------|----------|-----------------|----------------|---------|-----|
| 1       | N   | 87.055         | <b>70.029</b> | 69.045   | 115.050        | 98.024         | 97.040   | <b>133.061</b>  | 132.077  | 87.055         | 201.098  | <b>175.119</b>  | 158.092        | 10      | R   |
| 2       | P   | 154.108        | 167.082       | 166.097  | <b>212.103</b> | 195.078        | 194.092  | 230.114         | 229.130  | <b>70.065</b>  | 298.151  | <b>272.112</b>  | <b>255.145</b> | 9       | P   |
| 3       | C*  | 344.139        | 327.112       | 326.128  | <b>372.134</b> | 355.107        | 354.123  | 390.144         | 389.160  | <b>133.043</b> | 399.199  | 373.219         | <b>356.193</b> | 8       | T   |
| 4       | Q   | 472.197        | 455.171       | 454.187  | <b>500.192</b> | 483.166        | 482.182  | 518.203         | 517.219  | 101.071        | 562.262  | <b>536.283</b>  | 519.256        | 7       | Y   |
| 5       | I   | <b>585.281</b> | 568.255       | 567.271  | <b>613.278</b> | <b>596.250</b> | 595.266  | 631.287         | 630.303  | <b>86.096</b>  | 725.325  | <b>699.346</b>  | 682.320        | 6       | V   |
| 6       | V   | 748.345        | 731.318       | 730.334  | <b>776.340</b> | 759.313        | 758.329  | 794.350         | 793.366  | <b>136.076</b> | 838.409  | <b>812.430</b>  | 795.404        | 5       | I   |
| 7       | Y   | 911.408        | 894.381       | 893.397  | <b>939.403</b> | 922.376        | 921.392  | 957.413         | 956.429  | <b>136.076</b> | 966.468  | 940.489         | 923.462        | 4       | Q   |
| 8       | T   | 1072.456       | 985.429       | 984.445  | 1040.451       | 1023.424       | 1022.440 | 1058.461        | 1057.477 | 74.060         | 1128.499 | 1100.519        | 1083.493       | 3       | C*  |
| 9       | P   | 1109.508       | 1092.482      | 1091.498 | 1137.503       | 1120.477       | 1119.493 | 1155.514        | 1154.530 | <b>70.065</b>  | 1223.551 | 1197.572        | 1180.546       | 2       | P   |
| 10      | R   | 1265.610       | 1248.583      | 1247.599 | 1293.604       | 1276.578       | 1275.594 | <b>1311.615</b> | 1310.631 | <b>129.113</b> | 1337.594 | <b>1311.615</b> | 1294.588       | 1       | N   |

BioTools Version 3.2 Copyright © 1999-2008 Bruker Daltonik GmbH Page -2-



Area 3. Annotated MS/MS spectrum of ion 1252.585 m/z.

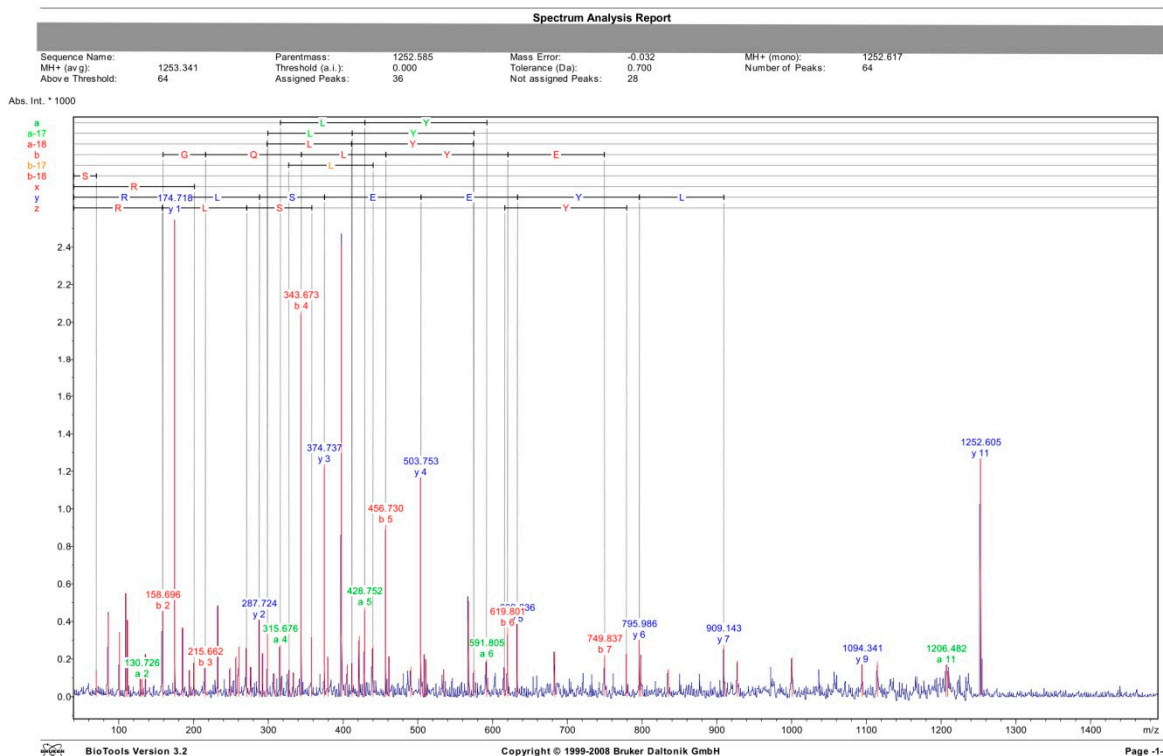

**Spectrum Analysis Report**

Display Parameter:

|                   |          |                     |        |                  |          |                  |          |
|-------------------|----------|---------------------|--------|------------------|----------|------------------|----------|
| Parentmass:       | 1252.585 | Mass Error:         | -0.032 | MH+ (mono):      | 1252.617 | MH+ (avg):       | 1253.341 |
| Threshold (a.i.): | 0.000    | Tolerance (Da):     | 0.700  | Number of Peaks: | 64       | Above Threshold: | 64       |
| Assigned Peaks:   | 36       | Not assigned Peaks: | 28     |                  |          |                  |          |

Peaklist:

| Peak | Mass     | Intensity | Peak | Mass     | Intensity | Peak | Mass     | Intensity | Peak | Mass     | Intensity | Peak | Mass     | Intensity |
|------|----------|-----------|------|----------|-----------|------|----------|-----------|------|----------|-----------|------|----------|-----------|
| 1    | 69.793   | 135.494   | 2    | 85.803   | 438.962   | 3    | 100.752  | 338.743   | 4    | 109.733  | 551.573   | 5    | 111.746  | 406.852   |
| 6    | 126.762  | 146.589   | 7    | 130.726  | 93.744    | 8    | 135.722  | 225.852   | 9    | 158.696  | 456.966   | 10   | 174.718  | 293.821   |
| 11   | 185.678  | 366.654   | 12   | 194.656  | 141.682   | 13   | 200.702  | 184.725   | 14   | 215.662  | 153.937   | 15   | 232.689  | 487.120   |
| 16   | 248.676  | 154.192   | 17   | 256.686  | 214.025   | 18   | 260.701  | 267.899   | 19   | 270.728  | 257.021   | 20   | 276.706  | 160.398   |
| 21   | 287.724  | 409.669   | 22   | 292.652  | 234.192   | 23   | 298.708  | 398.223   | 24   | 307.695  | 123.763   | 25   | 315.676  | 278.524   |
| 26   | 327.670  | 145.902   | 27   | 333.704  | 124.761   | 28   | 343.673  | 2058.408  | 29   | 357.737  | 317.547   | 30   | 374.737  | 1238.367  |
| 31   | 379.718  | 207.077   | 32   | 397.713  | 2414.096  | 33   | 406.704  | 173.086   | 34   | 411.765  | 180.553   | 35   | 421.679  | 322.944   |
| 36   | 428.752  | 475.771   | 37   | 439.745  | 274.262   | 38   | 456.730  | 915.905   | 39   | 461.749  | 215.266   | 40   | 480.681  | 159.437   |
| 41   | 503.753  | 1167.013  | 42   | 508.712  | 227.421   | 43   | 510.749  | 186.775   | 44   | 534.723  | 142.266   | 45   | 567.820  | 511.059   |
| 46   | 574.803  | 148.092   | 47   | 591.805  | 199.786   | 48   | 616.795  | 152.153   | 49   | 619.801  | 366.533   | 50   | 632.836  | 387.671   |
| 51   | 692.823  | 238.330   | 52   | 749.837  | 222.777   | 53   | 778.801  | 236.575   | 54   | 795.986  | 302.993   | 55   | 798.106  | 297.631   |
| 56   | 834.961  | 144.367   | 57   | 909.143  | 277.815   | 58   | 927.356  | 192.851   | 59   | 1000.338 | 209.194   | 60   | 1094.341 | 171.618   |
| 61   | 1114.832 | 187.700   | 62   | 1206.482 | 169.273   | 63   | 1208.635 | 137.338   | 64   | 1252.605 | 1268.629  |      |          |           |

Calculated Masses:  
SAGOLYEESLR

| N-Term | Ion | a               | a-17           | a-18           | b              | b-17           | b-18           | b+18            | c              | i              | x              | y               | z              | C-Term | Ion |
|--------|-----|-----------------|----------------|----------------|----------------|----------------|----------------|-----------------|----------------|----------------|----------------|-----------------|----------------|--------|-----|
| 1      | S   | 60.044          | 43.018         | 42.034         | 88.039         | 71.013         | <b>70.029</b>  | 106.050         | 105.068        | 60.044         | <b>201.098</b> | <b>175.119</b>  | <b>158.092</b> | 11     | R   |
| 2      | A   | <b>131.682</b>  | 114.055        | 113.071        | <b>159.078</b> | 142.050        | 141.068        | 177.087         | 176.103        | 44.049         | 314.182        | <b>288.263</b>  | <b>271.176</b> | 10     | L   |
| 3      | G   | 188.103         | 171.076        | 170.092        | <b>216.098</b> | 199.071        | 198.087        | 234.108         | <b>233.124</b> | 30.034         | 401.214        | <b>375.235</b>  | <b>358.208</b> | 9      | S   |
| 4      | Q   | <b>316.162</b>  | <b>298.135</b> | <b>296.151</b> | <b>344.156</b> | <b>327.130</b> | 326.146        | 362.167         | 361.183        | <b>101.071</b> | 530.257        | <b>504.278</b>  | 487.251        | 8      | E   |
| 5      | L   | <b>429.246</b>  | <b>412.219</b> | <b>411.235</b> | <b>457.241</b> | <b>440.214</b> | <b>439.230</b> | 475.251         | 474.267        | <b>85.096</b>  | 659.299        | <b>633.320</b>  | <b>616.294</b> | 7      | E   |
| 6      | Y   | <b>592.309</b>  | <b>575.282</b> | <b>574.298</b> | <b>620.304</b> | <b>603.277</b> | 602.293        | 638.314         | 637.330        | <b>136.076</b> | 822.363        | <b>796.384</b>  | <b>779.357</b> | 6      | Y   |
| 7      | E   | 721.352         | 704.325        | 703.341        | <b>749.346</b> | 732.320        | 731.336        | 767.357         | 766.373        | 102.055        | 935.447        | <b>909.468</b>  | 892.441        | 5      | L   |
| 8      | E   | 850.394         | 833.368        | 832.384        | 878.389        | 861.362        | 860.378        | 896.400         | 895.416        | 102.055        | 1063.505       | 1037.526        | 1020.500       | 4      | Q   |
| 9      | S   | 937.426         | 920.400        | 919.416        | 965.421        | 948.395        | 947.411        | 983.432         | 982.448        | 60.044         | 1120.527       | <b>1094.548</b> | 1077.521       | 3      | G   |
| 10     | L   | 1050.510        | 1033.484       | 1032.500       | 1078.505       | 1061.479       | 1060.495       | 1096.516        | 1095.532       | <b>86.096</b>  | 1191.564       | 1165.585        | 1148.558       | 2      | A   |
| 11     | R   | <b>1206.611</b> | 1189.585       | 1188.601       | 1234.606       | 1217.580       | 1216.596       | <b>1252.617</b> | 1251.633       | <b>129.113</b> | 1278.596       | <b>1252.617</b> | 1235.590       | 1      | S   |

BioTools Version 3.2 Copyright © 1999-2008 Bruker Daltonik GmbH Page -2-

## Area 3. Annotated MS/MS spectrum of ion 1064.508 m/z.

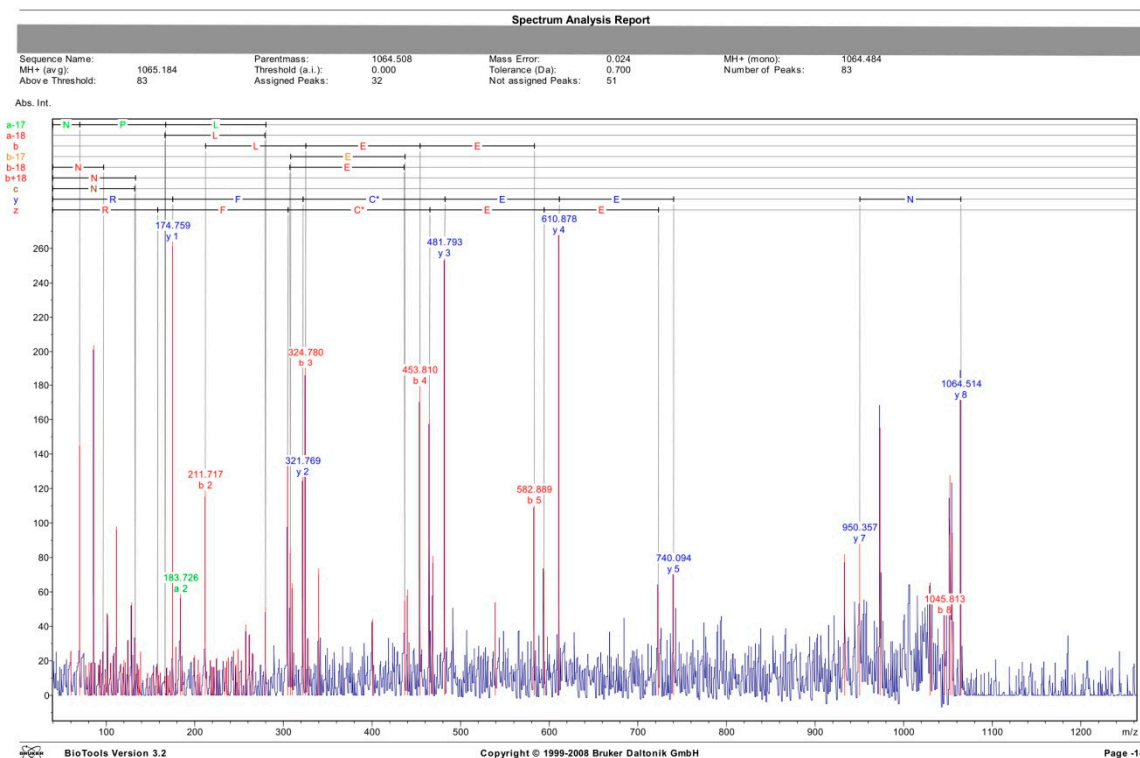

**Spectrum Analysis Report**

Display Parameter:      Parentmass: 1064.508      Mass Error: 0.024      MH+ (mono): 1064.484      MH+ (avg): 1065.184  
 Threshold (a.i.): 0.000      Tolerance (Da): 0.700      Number of Peaks: 83      Above Threshold: 83  
 Assigned Peaks: 32      Not assigned Peaks: 51

**Peaklist:**

| Peak | Mass     | Intensity | Peak | Mass     | Intensity | Peak | Mass     | Intensity | Peak | Mass     | Intensity | Peak | Mass     | Intensity |
|------|----------|-----------|------|----------|-----------|------|----------|-----------|------|----------|-----------|------|----------|-----------|
| 1    | 60.244   | 25.829    | 2    | 69.831   | 146.353   | 3    | 76.808   | 17.785    | 4    | 80.478   | 19.302    | 5    | 83.242   | 19.259    |
| 6    | 85.843   | 203.847   | 7    | 92.069   | 17.536    | 8    | 93.560   | 20.800    | 9    | 96.481   | 26.940    | 10   | 99.095   | 13.705    |
| 11   | 101.773  | 46.706    | 12   | 105.260  | 18.978    | 13   | 108.103  | 23.720    | 14   | 111.774  | 98.051    | 15   | 116.275  | 17.429    |
| 16   | 119.758  | 20.607    | 17   | 121.422  | 19.005    | 18   | 124.745  | 32.325    | 19   | 128.781  | 53.917    | 20   | 132.729  | 31.032    |
| 21   | 135.837  | 17.423    | 22   | 138.896  | 16.450    | 23   | 138.787  | 28.555    | 24   | 148.706  | 13.223    | 25   | 152.650  | 13.314    |
| 26   | 156.336  | 16.739    | 27   | 157.744  | 18.637    | 28   | 161.242  | 12.627    | 29   | 168.403  | 11.393    | 30   | 168.359  | 16.344    |
| 31   | 169.859  | 11.886    | 32   | 172.148  | 13.538    | 33   | 174.759  | 264.002   | 34   | 178.747  | 28.279    | 35   | 183.726  | 58.898    |
| 36   | 186.071  | 14.588    | 37   | 189.770  | 23.572    | 38   | 203.843  | 20.876    | 39   | 205.622  | 13.133    | 40   | 211.717  | 118.753   |
| 41   | 217.731  | 20.555    | 42   | 219.858  | 16.293    | 43   | 222.124  | 16.535    | 44   | 224.745  | 22.043    | 45   | 233.432  | 16.590    |
| 46   | 235.771  | 20.259    | 47   | 237.850  | 22.170    | 48   | 243.706  | 25.953    | 49   | 246.428  | 18.179    | 50   | 248.732  | 27.237    |
| 51   | 252.810  | 20.279    | 52   | 257.655  | 41.150    | 53   | 261.741  | 35.557    | 54   | 263.778  | 23.887    | 55   | 279.713  | 51.611    |
| 56   | 304.734  | 138.202   | 57   | 307.737  | 85.650    | 58   | 309.800  | 65.216    | 59   | 321.769  | 126.729   | 60   | 324.780  | 190.096   |
| 61   | 327.729  | 33.494    | 62   | 339.747  | 73.822    | 63   | 400.719  | 44.322    | 64   | 436.799  | 55.904    | 65   | 439.775  | 61.426    |
| 66   | 453.810  | 179.437   | 67   | 464.758  | 160.465   | 68   | 468.796  | 80.861    | 69   | 481.793  | 254.271   | 70   | 538.869  | 54.192    |
| 71   | 582.889  | 110.102   | 72   | 593.890  | 72.511    | 73   | 610.878  | 267.784   | 74   | 722.907  | 62.891    | 75   | 740.094  | 70.207    |
| 76   | 933.296  | 81.916    | 77   | 950.357  | 87.996    | 78   | 973.299  | 155.280   | 79   | 1029.648 | 65.588    | 80   | 1045.813 | 46.454    |
| 81   | 1052.186 | 127.770   | 82   | 1054.765 | 94.357    | 83   | 1064.514 | 171.377   |      |          |           |      |          |           |

**Calculated Masses:**  
 NPLEEFR b. Carbamidomethyl (C)

| N-Term | Ion | a        | a-17     | a-16     | b        | b-17     | b-16     | b-15     | b-14     | c       | i        | x        | y        | z       | C-Term | Ion |
|--------|-----|----------|----------|----------|----------|----------|----------|----------|----------|---------|----------|----------|----------|---------|--------|-----|
| 1      | N   | 87.055   | 78.029   | 69.045   | 115.050  | 98.024   | 97.040   | 133.061  | 132.077  | 87.055  | 201.098  | 348.167  | 175.119  | 158.092 | 6      | R   |
| 2      | P   | 184.108  | 167.082  | 166.097  | 212.103  | 195.076  | 194.092  | 230.114  | 229.130  | 70.065  | 348.167  | 322.187  | 305.161  | 7       | F      |     |
| 3      | L   | 297.192  | 280.166  | 279.182  | 325.187  | 308.160  | 307.176  | 343.198  | 342.214  | 86.096  | 508.197  | 482.218  | 465.191  | 8       | C*     |     |
| 4      | E   | 428.235  | 409.208  | 408.224  | 454.230  | 437.203  | 436.219  | 472.240  | 471.256  | 102.055 | 637.240  | 611.261  | 594.234  | 9       | E      |     |
| 5      | E   | 555.277  | 538.251  | 537.267  | 583.272  | 566.246  | 565.262  | 601.283  | 600.299  | 102.055 | 786.282  | 740.303  | 723.277  | 4       | E      |     |
| 6      | C*  | 715.308  | 696.281  | 695.297  | 743.303  | 726.276  | 725.292  | 761.313  | 760.329  | 133.043 | 879.367  | 853.387  | 836.361  | 3       | L      |     |
| 7      | F   | 862.376  | 845.350  | 844.366  | 890.371  | 873.345  | 872.361  | 908.382  | 907.398  | 120.051 | 976.419  | 950.440  | 933.413  | 2       | P      |     |
| 8      | R   | 1018.477 | 1001.451 | 1000.467 | 1046.472 | 1029.446 | 1028.462 | 1064.483 | 1063.499 | 129.113 | 1090.462 | 1064.483 | 1047.456 | 1       | N      |     |

BioTools Version 3.2      Copyright © 1999-2008 Bruker Daltonik GmbH      Page 2-

### Area 3. Annotated MS/MS spectrum of ion 1137.599 m/z.

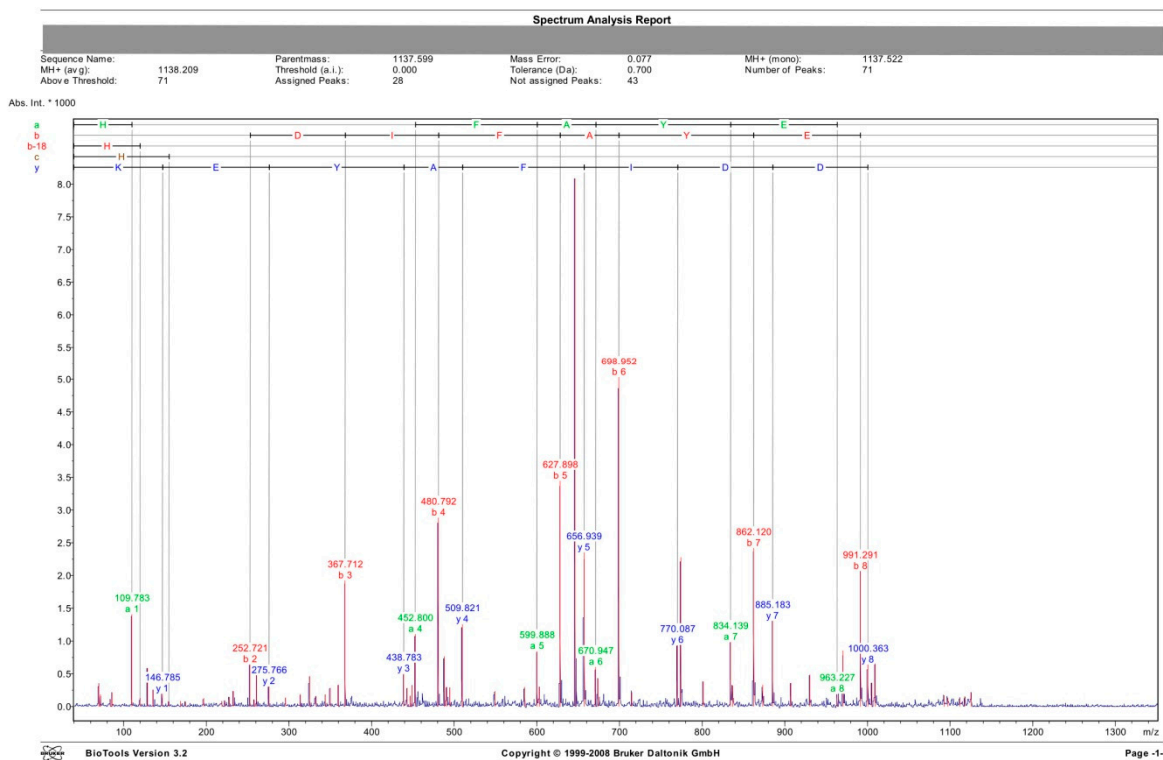

**Spectrum Analysis Report**

**Display Parameter:**

|                   |          |                     |       |                  |          |                  |          |
|-------------------|----------|---------------------|-------|------------------|----------|------------------|----------|
| Parentmass:       | 1137.599 | Mass Error:         | 0.077 | MH+ (mono):      | 1137.522 | MH+ (avg):       | 1138.209 |
| Threshold (a.i.): | 0.000    | Tolerance (Da):     | 0.700 | Number of Peaks: | 71       | Above Threshold: | 71       |
| Assigned Peaks:   | 28       | Not assigned Peaks: | 43    |                  |          |                  |          |

**Peaklist:**

| Peak | Mass     | Intensity | Peak | Mass     | Intensity | Peak | Mass     | Intensity | Peak | Mass     | Intensity | Peak | Mass     | Intensity |
|------|----------|-----------|------|----------|-----------|------|----------|-----------|------|----------|-----------|------|----------|-----------|
| 1    | 69.816   | 343.836   | 2    | 71.826   | 189.351   | 3    | 83.828   | 113.505   | 4    | 85.829   | 216.619   | 5    | 109.783  | 1410.460  |
| 6    | 119.786  | 127.164   | 7    | 128.786  | 588.410   | 8    | 135.784  | 256.266   | 9    | 146.785  | 196.534   | 10   | 154.743  | 80.691    |
| 11   | 168.819  | 82.002    | 12   | 174.764  | 77.173    | 13   | 196.786  | 131.240   | 14   | 218.746  | 83.513    | 15   | 222.754  | 93.353    |
| 16   | 227.822  | 147.788   | 17   | 232.785  | 238.738   | 18   | 252.721  | 645.376   | 19   | 257.774  | 107.832   | 20   | 260.760  | 643.451   |
| 21   | 275.766  | 311.945   | 22   | 285.766  | 137.382   | 23   | 313.777  | 193.026   | 24   | 324.846  | 446.919   | 25   | 332.818  | 161.681   |
| 26   | 343.741  | 187.793   | 27   | 349.788  | 284.947   | 28   | 359.808  | 334.088   | 29   | 367.712  | 1927.375  | 30   | 438.783  | 501.639   |
| 31   | 442.828  | 285.223   | 32   | 446.796  | 167.186   | 33   | 448.823  | 318.048   | 34   | 452.800  | 1107.542  | 35   | 480.792  | 2886.692  |
| 36   | 487.839  | 769.128   | 37   | 490.794  | 299.923   | 38   | 494.721  | 291.238   | 39   | 509.821  | 1258.117  | 40   | 548.937  | 238.976   |
| 41   | 584.968  | 301.358   | 42   | 599.888  | 846.409   | 43   | 602.952  | 307.497   | 44   | 627.898  | 3449.228  | 45   | 646.015  | 8251.069  |
| 46   | 656.939  | 2354.501  | 47   | 670.947  | 604.765   | 48   | 673.901  | 426.309   | 49   | 698.952  | 5032.405  | 50   | 714.705  | 219.482   |
| 51   | 770.087  | 938.651   | 52   | 774.153  | 2281.561  | 53   | 801.863  | 384.730   | 54   | 834.139  | 686.599   | 55   | 836.802  | 323.125   |
| 56   | 862.120  | 2420.739  | 57   | 873.230  | 335.233   | 58   | 885.183  | 1308.410  | 59   | 907.301  | 361.966   | 60   | 930.213  | 489.515   |
| 61   | 963.227  | 193.910   | 62   | 970.304  | 857.672   | 63   | 991.291  | 2068.049  | 64   | 1000.363 | 639.914   | 65   | 1005.259 | 363.334   |
| 66   | 1009.321 | 659.582   | 67   | 1082.536 | 172.839   | 68   | 1097.087 | 136.056   | 69   | 1111.640 | 131.236   | 70   | 1117.472 | 157.670   |
| 71   | 1125.811 | 210.636   |      |          |           |      |          |           |      |          |           |      |          |           |

**Calculated Masses:**  
HDDIFAYEK

| N-Term | Ion | a        | a-17     | a-18     | b        | b-17     | b-18     | b+18     | c        | i       | x        | y        | z        | C-Term | Ion |
|--------|-----|----------|----------|----------|----------|----------|----------|----------|----------|---------|----------|----------|----------|--------|-----|
| 1      | H   | 110.071  | 93.045   | 92.061   | 138.066  | 121.040  | 120.056  | 156.077  | 155.093  | 110.071 | 173.092  | 147.113  | 130.086  | 9      | K   |
| 2      | D   | 225.098  | 208.072  | 207.088  | 253.093  | 236.067  | 235.083  | 271.104  | 270.120  | 88.039  | 302.135  | 276.155  | 259.129  | 8      | E   |
| 3      | D   | 340.125  | 323.099  | 322.115  | 368.120  | 351.094  | 350.110  | 386.131  | 385.147  | 83.059  | 465.198  | 439.219  | 422.192  | 7      | Y   |
| 4      | I   | 453.209  | 436.183  | 435.199  | 481.204  | 464.178  | 463.194  | 499.215  | 498.231  | 86.096  | 536.235  | 510.256  | 493.229  | 6      | A   |
| 5      | F   | 600.278  | 583.251  | 582.267  | 628.273  | 611.246  | 610.262  | 646.283  | 645.299  | 120.081 | 683.304  | 657.324  | 640.298  | 5      | F   |
| 6      | A   | 671.315  | 654.289  | 653.304  | 699.310  | 682.283  | 681.299  | 717.320  | 716.336  | 44.049  | 796.388  | 770.408  | 753.382  | 4      | I   |
| 7      | Y   | 834.378  | 817.352  | 816.368  | 862.373  | 845.346  | 844.362  | 880.384  | 879.400  | 136.076 | 911.415  | 885.435  | 868.409  | 3      | D   |
| 8      | E   | 963.421  | 946.394  | 945.410  | 991.416  | 974.389  | 973.405  | 1009.426 | 1008.442 | 102.055 | 1028.441 | 1000.462 | 983.436  | 2      | D   |
| 9      | K   | 1091.516 | 1074.489 | 1073.505 | 1119.511 | 1102.484 | 1101.500 | 1137.521 | 1136.537 | 101.107 | 1163.500 | 1137.521 | 1120.495 | 1      | H   |

BioTools Version 3.2 Copyright © 1999-2008 Bruker Daltonik GmbH Page -2-

Area 3. Annotated MS/MS spectrum of ion 1493.766 m/z.

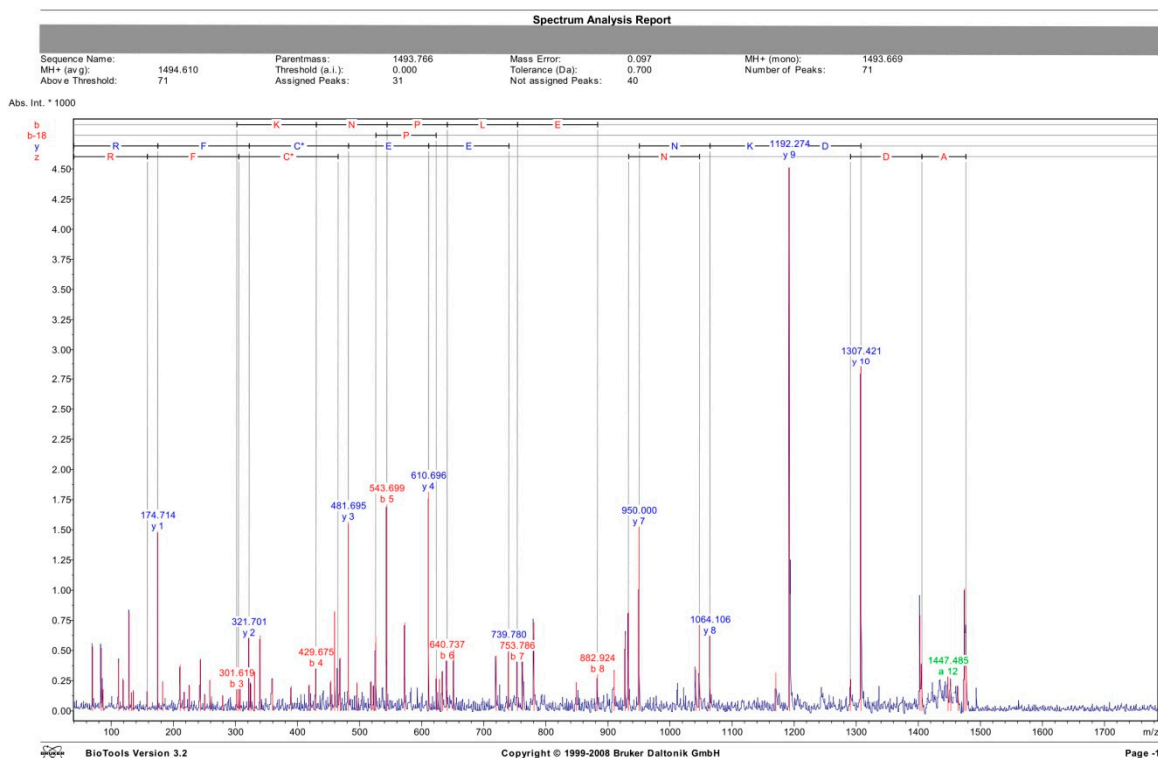

Spectrum Analysis Report

Display Parameter: Parentmass: 1493.766 Mass Error: 0.097 MH+ (mono): 1493.669 MH+ (avg): 1494.610  
 Threshold (a.i.): 0.000 Tolerance (Da): 0.700 Number of Peaks: 71  
 Assigned Peaks: 31 Not assigned Peaks: 40 Above Threshold: 71

| Peak | Mass     | Intensity | Peak | Mass     | Intensity | Peak | Mass     | Intensity | Peak | Mass     | Intensity | Peak | Mass     | Intensity |
|------|----------|-----------|------|----------|-----------|------|----------|-----------|------|----------|-----------|------|----------|-----------|
| 1    | 69.786   | 535.000   | 2    | 83.780   | 522.353   | 3    | 86.759   | 179.815   | 4    | 111.736  | 404.479   | 5    | 119.744  | 252.616   |
| 6    | 126.742  | 814.149   | 7    | 132.718  | 147.264   | 8    | 135.679  | 158.545   | 9    | 157.700  | 157.081   | 10   | 174.714  | 1487.122  |
| 11   | 182.743  | 245.937   | 12   | 210.719  | 383.533   | 13   | 217.698  | 158.171   | 14   | 225.698  | 215.399   | 15   | 243.679  | 433.203   |
| 16   | 250.686  | 137.867   | 17   | 258.613  | 259.311   | 18   | 279.669  | 122.667   | 19   | 301.619  | 179.997   | 20   | 304.683  | 379.614   |
| 21   | 307.668  | 225.272   | 22   | 321.701  | 603.562   | 23   | 324.723  | 223.328   | 24   | 330.746  | 321.783   | 25   | 338.707  | 625.370   |
| 26   | 359.608  | 270.042   | 27   | 389.695  | 206.157   | 28   | 418.643  | 220.812   | 29   | 429.675  | 352.456   | 30   | 453.716  | 251.210   |
| 31   | 459.744  | 828.781   | 32   | 464.678  | 349.062   | 33   | 466.696  | 441.304   | 34   | 481.695  | 1565.615  | 35   | 495.677  | 238.176   |
| 36   | 518.698  | 248.053   | 37   | 522.642  | 214.592   | 38   | 525.687  | 616.799   | 39   | 543.699  | 1710.060  | 40   | 572.607  | 731.432   |
| 41   | 610.696  | 1816.242  | 42   | 623.742  | 299.958   | 43   | 628.750  | 265.302   | 44   | 633.667  | 331.401   | 45   | 640.737  | 414.690   |
| 46   | 651.638  | 951.091   | 47   | 719.840  | 457.348   | 48   | 739.780  | 497.298   | 49   | 753.786  | 406.528   | 50   | 762.730  | 503.373   |
| 51   | 780.748  | 735.241   | 52   | 848.942  | 238.046   | 53   | 882.024  | 303.847   | 54   | 909.848  | 324.258   | 55   | 927.860  | 628.996   |
| 56   | 932.935  | 832.334   | 57   | 950.000  | 1527.053  | 58   | 1041.118 | 341.143   | 59   | 1047.057 | 738.955   | 60   | 1064.106 | 622.161   |
| 61   | 1170.363 | 319.204   | 62   | 1192.274 | 4574.991  | 63   | 1290.335 | 265.616   | 64   | 1307.421 | 2854.830  | 65   | 1402.620 | 791.963   |
| 66   | 1405.563 | 368.177   | 67   | 1447.485 | 262.744   | 68   | 1452.054 | 245.644   | 69   | 1463.647 | 204.076   | 70   | 1474.443 | 1016.820  |
| 71   | 1477.958 | 407.507   |      |          |           |      |          |           |      |          |           |      |          |           |

Calculated Masses:  
 ADDKNPLEECFR 10: Carbamidomethyl (C)

| N-Term | Ion | a        | a-17     | a-18     | b        | b-17     | b-18     | b+18     | c        | i       | x        | y        | z        | C-Term | Ion |
|--------|-----|----------|----------|----------|----------|----------|----------|----------|----------|---------|----------|----------|----------|--------|-----|
| 1      | A   | 44.049   | 27.023   | 26.039   | 72.044   | 55.018   | 54.034   | 90.055   | 89.071   | 44.049  | 201.088  | 175.119  | 158.092  | 12     | R   |
| 2      | D   | 159.076  | 142.050  | 141.066  | 187.071  | 170.045  | 169.061  | 205.082  | 204.098  | 88.039  | 348.167  | 322.187  | 305.161  | 11     | F   |
| 3      | D   | 214.103  | 257.077  | 256.093  | 302.098  | 285.072  | 284.088  | 320.109  | 319.125  | 88.039  | 508.197  | 482.216  | 465.191  | 10     | C*  |
| 4      | K   | 402.198  | 385.172  | 384.188  | 430.193  | 413.167  | 412.183  | 448.204  | 447.220  | 101.107 | 637.240  | 611.261  | 594.234  | 9      | E   |
| 5      | N   | 516.241  | 499.215  | 498.231  | 544.236  | 527.210  | 526.226  | 562.247  | 561.263  | 87.055  | 766.282  | 740.303  | 723.277  | 8      | E   |
| 6      | P   | 613.294  | 596.267  | 595.283  | 641.289  | 624.262  | 623.278  | 659.299  | 658.315  | 70.065  | 879.307  | 853.327  | 836.301  | 7      | L   |
| 7      | L   | 726.378  | 709.352  | 708.368  | 754.373  | 737.346  | 736.362  | 772.384  | 771.400  | 86.096  | 976.419  | 950.440  | 933.413  | 6      | P   |
| 8      | E   | 855.421  | 838.394  | 837.410  | 883.416  | 866.389  | 865.405  | 901.426  | 900.442  | 102.055 | 1090.462 | 1064.483 | 1047.456 | 5      | N   |
| 9      | E   | 984.463  | 967.437  | 966.453  | 1012.458 | 995.432  | 994.448  | 1030.469 | 1029.485 | 102.055 | 1218.537 | 1192.578 | 1175.551 | 4      | K   |
| 10     | C*  | 1144.494 | 1127.467 | 1126.483 | 1172.489 | 1155.462 | 1154.478 | 1190.499 | 1189.515 | 133.043 | 1333.584 | 1307.605 | 1290.578 | 3      | D   |
| 11     | F   | 1291.562 | 1274.536 | 1273.552 | 1319.557 | 1302.531 | 1301.547 | 1337.568 | 1336.584 | 120.081 | 1448.611 | 1422.632 | 1405.605 | 2      | D   |
| 12     | R   | 1447.663 | 1430.637 | 1429.653 | 1475.658 | 1458.632 | 1457.648 | 1493.669 | 1492.685 | 129.113 | 1519.648 | 1493.669 | 1476.642 | 1      | A   |

Area 3. Annotated MS/MS spectrum of ion 1260.623 m/z.

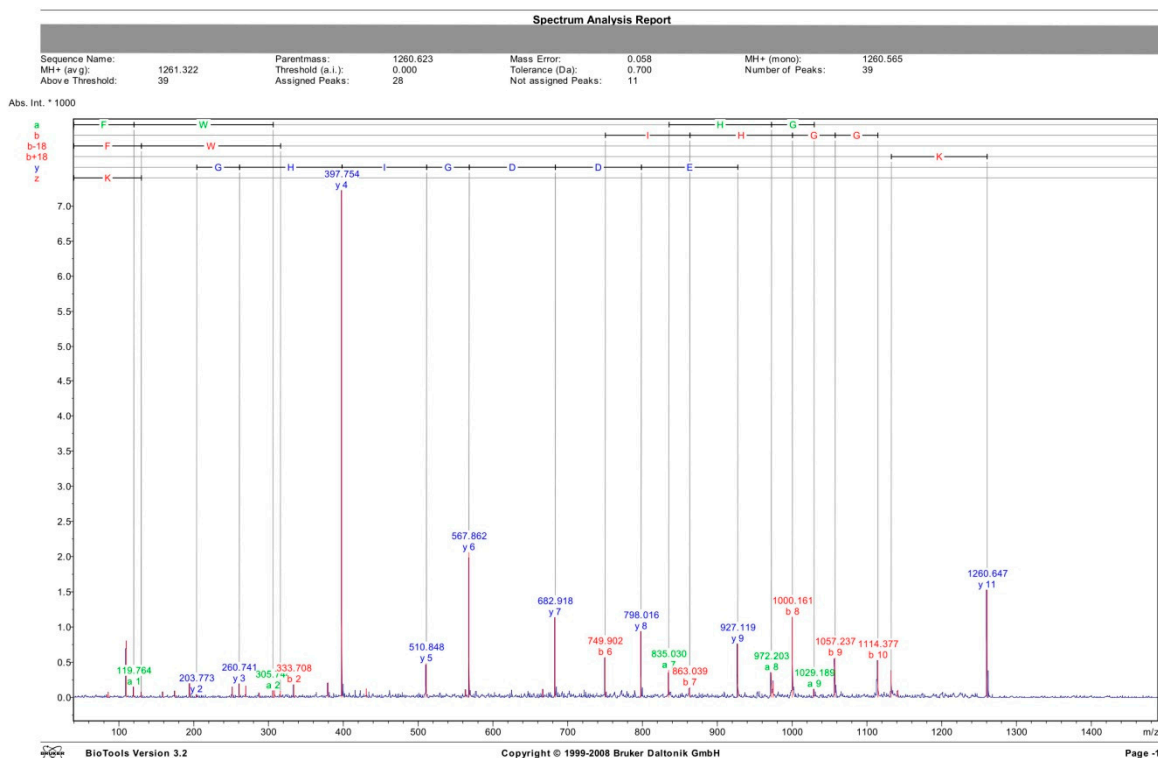

**Spectrum Analysis Report**

|                           |  |                   |          |                     |       |                  |          |                  |          |
|---------------------------|--|-------------------|----------|---------------------|-------|------------------|----------|------------------|----------|
| <b>Display Parameter:</b> |  | Parentmass:       | 1260.623 | Mass Error:         | 0.058 | MH+ (mono):      | 1260.565 | MH+ (avg):       | 1261.322 |
|                           |  | Threshold (a.i.): | 0.000    | Tolerance (Da):     | 0.700 | Number of Peaks: | 39       | Above Threshold: | 39       |
|                           |  | Assigned Peaks:   | 28       | Not assigned Peaks: | 11    |                  |          |                  |          |

**Peaklist:**

| Peak | Mass     | Intensity | Peak | Mass     | Intensity | Peak | Mass     | Intensity | Peak | Mass     | Intensity | Peak | Mass     | Intensity |
|------|----------|-----------|------|----------|-----------|------|----------|-----------|------|----------|-----------|------|----------|-----------|
| 1    | 83.763   | 41.274    | 2    | 85.811   | 76.589    | 3    | 109.761  | 809.766   | 4    | 119.764  | 153.613   | 5    | 129.722  | 78.582    |
| 6    | 158.744  | 83.771    | 7    | 174.703  | 97.548    | 8    | 194.716  | 242.710   | 9    | 203.773  | 44.434    | 10   | 251.676  | 152.532   |
| 11   | 260.741  | 197.775   | 12   | 269.701  | 167.081   | 13   | 287.677  | 67.138    | 14   | 305.744  | 97.987    | 15   | 307.727  | 139.552   |
| 16   | 315.684  | 94.405    | 17   | 333.708  | 187.865   | 18   | 379.733  | 216.777   | 19   | 397.754  | 7226.385  | 20   | 430.733  | 127.606   |
| 21   | 510.848  | 484.471   | 22   | 563.788  | 114.094   | 23   | 567.862  | 2363.657  | 24   | 666.890  | 121.382   | 25   | 862.918  | 1142.320  |
| 26   | 749.902  | 573.819   | 27   | 798.016  | 940.423   | 28   | 835.030  | 389.138   | 29   | 863.039  | 142.839   | 30   | 927.119  | 765.625   |
| 31   | 972.203  | 358.851   | 32   | 974.751  | 206.653   | 33   | 1000.161 | 1145.100  | 34   | 1029.189 | 120.803   | 35   | 1057.237 | 567.054   |
| 38   | 1114.377 | 529.165   | 37   | 1132.371 | 380.499   | 38   | 1141.247 | 108.700   | 39   | 1260.647 | 1530.961  |      |          |           |

**Calculated Masses:**  
FWDDGHHGK

| N-Term | Ion | a        | a-17     | a-18     | b        | b-17     | b-18     | b+18     | c        | i       | x        | y        | z        | C-Term | Ion |
|--------|-----|----------|----------|----------|----------|----------|----------|----------|----------|---------|----------|----------|----------|--------|-----|
| 1      | F   | 120.081  | 103.054  | 102.070  | 148.076  | 131.049  | 130.065  | 166.086  | 165.102  | 120.081 | 173.092  | 147.113  | 130.086  | 11     | K   |
| 2      | W   | 306.160  | 289.134  | 288.150  | 334.155  | 317.128  | 316.144  | 352.166  | 351.182  | 199.092 | 230.114  | 204.134  | 187.108  | 10     | G   |
| 3      | E   | 435.203  | 418.176  | 417.192  | 463.198  | 446.171  | 445.187  | 481.208  | 480.224  | 102.055 | 287.135  | 261.156  | 244.129  | 9      | G   |
| 4      | D   | 550.230  | 533.203  | 532.219  | 578.225  | 561.198  | 560.214  | 596.235  | 595.251  | 88.039  | 424.194  | 398.215  | 381.188  | 8      | H   |
| 5      | D   | 665.257  | 648.230  | 647.246  | 693.251  | 676.225  | 675.241  | 711.262  | 710.278  | 88.039  | 537.278  | 511.299  | 494.272  | 7      | I   |
| 6      | G   | 722.278  | 705.251  | 704.267  | 750.273  | 733.246  | 732.262  | 768.284  | 767.299  | 30.034  | 594.299  | 568.320  | 551.294  | 6      | G   |
| 7      | I   | 835.302  | 818.275  | 817.292  | 863.307  | 846.280  | 845.296  | 881.308  | 880.324  | 88.096  | 709.326  | 683.347  | 666.321  | 5      | D   |
| 8      | H   | 972.421  | 955.394  | 954.410  | 1000.416 | 983.389  | 982.405  | 1018.426 | 1017.442 | 110.071 | 824.353  | 798.374  | 781.348  | 4      | D   |
| 9      | G   | 1029.442 | 1012.415 | 1011.432 | 1057.437 | 1040.411 | 1039.427 | 1075.448 | 1074.464 | 30.034  | 953.396  | 927.417  | 910.390  | 3      | E   |
| 10     | G   | 1086.454 | 1069.427 | 1068.443 | 1114.459 | 1097.432 | 1096.448 | 1132.469 | 1131.485 | 30.034  | 1139.475 | 1113.496 | 1096.469 | 2      | W   |
| 11     | K   | 1214.559 | 1197.532 | 1196.548 | 1242.554 | 1225.527 | 1224.543 | 1260.564 | 1259.580 | 101.107 | 1286.544 | 1260.564 | 1243.538 | 1      | F   |

BioTools Version 3.2 Copyright © 1999-2008 Bruker Daltonik GmbH Page -2-

### Area 3. Annotated MS spectrum 1.

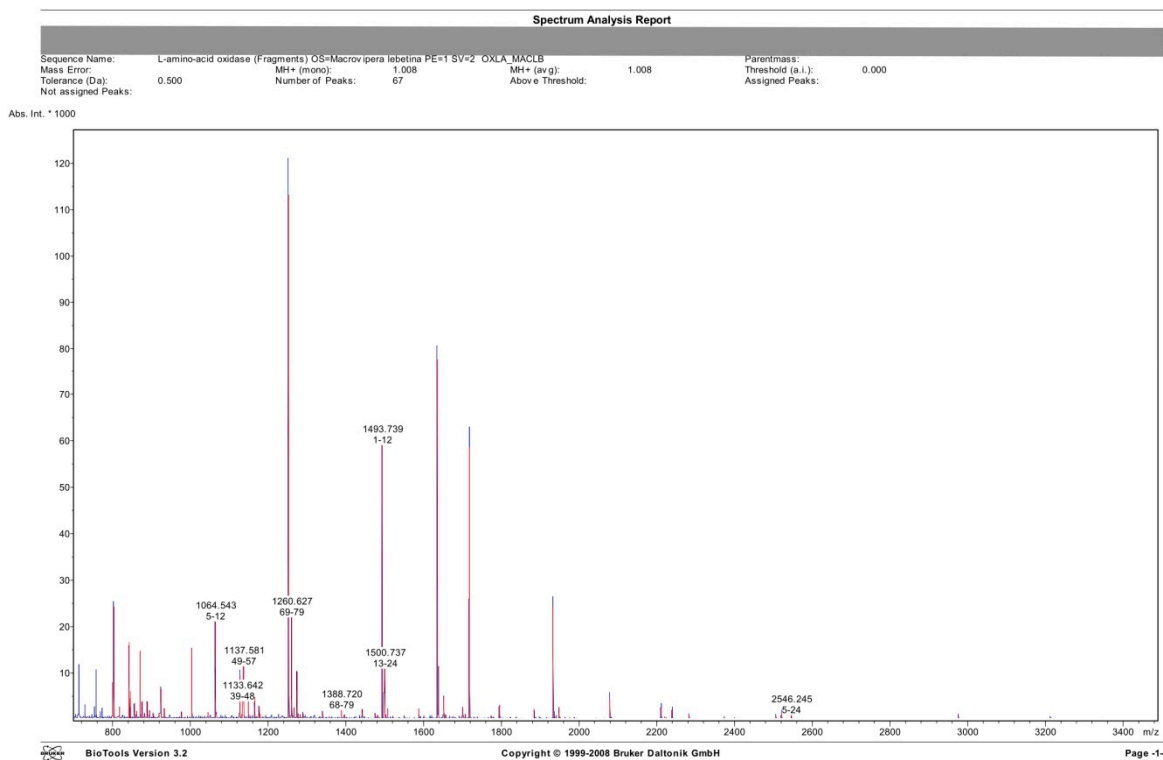

**Spectrum Analysis Report**

---

**Sequence data:**  
 L-amino-acid oxidase (Fragments) OS=Macrospira lebetina PE=1 SV=2 OXLA\_MACLB  
 Intensity Coverage: 21.5 % (131184 cnts) Sequence Coverage MS: 51.4%  
 Sequence Coverage MS/MS: 0.0% pl (isoelectric point): 4.4

|                                                                                                                                                                                                                                                                                                                                                                                                                                                                                                                                                                                                                                                                                                                                                                                                                                                                                                                                                                                                                                                                                                                                                                                                                                                                                                                                                                                                                                                                                                                                                                                                                                                                                                                                                                                                                                                                                                                                                                                                                                                                                                                                                                                                                                                                                                                                                                                                                                                                                                                                                                                                                                                                                                                                                                                                                                                                                                                                                                                                                                                                                                                                                                                                                                                                                                                                                                                                                                                                                                                                                                                                          |    |    |    |    |    |    |    |    |     |     |
|----------------------------------------------------------------------------------------------------------------------------------------------------------------------------------------------------------------------------------------------------------------------------------------------------------------------------------------------------------------------------------------------------------------------------------------------------------------------------------------------------------------------------------------------------------------------------------------------------------------------------------------------------------------------------------------------------------------------------------------------------------------------------------------------------------------------------------------------------------------------------------------------------------------------------------------------------------------------------------------------------------------------------------------------------------------------------------------------------------------------------------------------------------------------------------------------------------------------------------------------------------------------------------------------------------------------------------------------------------------------------------------------------------------------------------------------------------------------------------------------------------------------------------------------------------------------------------------------------------------------------------------------------------------------------------------------------------------------------------------------------------------------------------------------------------------------------------------------------------------------------------------------------------------------------------------------------------------------------------------------------------------------------------------------------------------------------------------------------------------------------------------------------------------------------------------------------------------------------------------------------------------------------------------------------------------------------------------------------------------------------------------------------------------------------------------------------------------------------------------------------------------------------------------------------------------------------------------------------------------------------------------------------------------------------------------------------------------------------------------------------------------------------------------------------------------------------------------------------------------------------------------------------------------------------------------------------------------------------------------------------------------------------------------------------------------------------------------------------------------------------------------------------------------------------------------------------------------------------------------------------------------------------------------------------------------------------------------------------------------------------------------------------------------------------------------------------------------------------------------------------------------------------------------------------------------------------------------------------------|----|----|----|----|----|----|----|----|-----|-----|
| 10                                                                                                                                                                                                                                                                                                                                                                                                                                                                                                                                                                                                                                                                                                                                                                                                                                                                                                                                                                                                                                                                                                                                                                                                                                                                                                                                                                                                                                                                                                                                                                                                                                                                                                                                                                                                                                                                                                                                                                                                                                                                                                                                                                                                                                                                                                                                                                                                                                                                                                                                                                                                                                                                                                                                                                                                                                                                                                                                                                                                                                                                                                                                                                                                                                                                                                                                                                                                                                                                                                                                                                                                       | 20 | 30 | 40 | 50 | 60 | 70 | 80 | 90 | 100 | 110 |
| <span style="color: red;">A</span> <span style="color: red;">D</span> <span style="color: red;">D</span> <span style="color: red;">P</span> <span style="color: red;">N</span> <span style="color: red;">P</span> <span style="color: red;">L</span> <span style="color: red;">E</span> <span style="color: red;">E</span> <span style="color: red;">C</span> <span style="color: red;">F</span> <span style="color: red;">R</span> <span style="color: red;">E</span> <span style="color: red;">D</span> <span style="color: red;">D</span> <span style="color: red;">T</span> <span style="color: red;">E</span> <span style="color: red;">F</span> <span style="color: red;">L</span> <span style="color: red;">E</span> <span style="color: red;">I</span> <span style="color: red;">A</span> <span style="color: red;">N</span> <span style="color: red;">G</span> <span style="color: red;">L</span> <span style="color: red;">E</span> <span style="color: red;">G</span> <span style="color: red;">W</span> <span style="color: red;">Y</span> <span style="color: red;">A</span> <span style="color: red;">N</span> <span style="color: red;">L</span> <span style="color: red;">G</span> <span style="color: red;">P</span> <span style="color: red;">N</span> <span style="color: red;">R</span> <span style="color: red;">Y</span> <span style="color: red;">V</span> <span style="color: red;">R</span> <span style="color: red;">P</span> <span style="color: red;">E</span> <span style="color: red;">E</span> <span style="color: red;">G</span> <span style="color: red;">E</span> <span style="color: red;">H</span> <span style="color: red;">D</span> <span style="color: red;">D</span> <span style="color: red;">I</span> <span style="color: red;">F</span> <span style="color: red;">A</span> <span style="color: red;">Y</span> <span style="color: red;">E</span> <span style="color: red;">F</span> <span style="color: red;">D</span> <span style="color: red;">E</span> <span style="color: red;">I</span> <span style="color: red;">V</span> <span style="color: red;">G</span> <span style="color: red;">H</span> <span style="color: red;">D</span> <span style="color: red;">K</span> <span style="color: red;">K</span> <span style="color: red;">F</span> <span style="color: red;">W</span> <span style="color: red;">E</span> <span style="color: red;">D</span> <span style="color: red;">D</span> <span style="color: red;">I</span> <span style="color: red;">H</span> <span style="color: red;">O</span> <span style="color: red;">O</span> <span style="color: red;">R</span> <span style="color: red;">E</span> <span style="color: red;">T</span> <span style="color: red;">F</span> <span style="color: red;">C</span> <span style="color: red;">Y</span> <span style="color: red;">S</span> <span style="color: red;">P</span> <span style="color: red;">M</span> <span style="color: red;">I</span> <span style="color: red;">Q</span> <span style="color: red;">K</span> <span style="color: red;">P</span> <span style="color: red;">Y</span> <span style="color: red;">Q</span> <span style="color: red;">P</span> <span style="color: red;">H</span> <span style="color: red;">F</span> <span style="color: red;">S</span> <span style="color: red;">E</span> <span style="color: red;">A</span> <span style="color: red;">L</span> <span style="color: red;">T</span> <span style="color: red;">A</span> <span style="color: red;">P</span> <span style="color: red;">V</span> <span style="color: red;">G</span> <span style="color: red;">R</span> |    |    |    |    |    |    |    |    |     |     |

**Display Parameter:**  
 Sequence Name: L-amino-acid oxidase (Fragments) OS=Macrospira lebetina PE=1 SV=2 OXLA\_MACLB  
 MH+ (avg): 1.008 Threshold (a.l.): 0.000 Tolerance (Da): 0.500 MH+ (mono): 1.008  
 Number of Peaks: 67

| Peak | Mass     | Intensity | Peak | Mass     | Intensity | Peak | Mass     | Intensity | Peak | Mass     | Intensity  | Peak | Mass     | Intensity |
|------|----------|-----------|------|----------|-----------|------|----------|-----------|------|----------|------------|------|----------|-----------|
| 1    | 801.544  | 3154.699  | 2    | 803.477  | 24198.183 | 3    | 817.521  | 2388.171  | 4    | 842.562  | 16942.805  | 5    | 844.535  | 4548.800  |
| 6    | 845.570  | 6055.236  | 7    | 856.578  | 3534.049  | 8    | 861.549  | 1715.237  | 9    | 870.597  | 14836.669  | 10   | 876.492  | 3665.253  |
| 11   | 882.522  | 1181.345  | 12   | 889.600  | 3842.561  | 13   | 895.526  | 1919.414  | 14   | 905.572  | 1229.809   | 15   | 918.540  | 1147.030  |
| 16   | 924.576  | 6562.769  | 17   | 933.630  | 2404.758  | 18   | 977.659  | 1574.993  | 19   | 1003.602 | 12566.076  | 20   | 1045.620 | 1523.909  |
| 21   | 1064.543 | 21060.262 | 22   | 1127.640 | 9495.382  | 23   | 1133.642 | 3880.082  | 24   | 1137.581 | 11422.342  | 25   | 1149.583 | 6874.682  |
| 26   | 1165.761 | 4850.660  | 27   | 1177.647 | 2751.347  | 28   | 1179.667 | 1220.383  | 29   | 1252.681 | 113235.987 | 30   | 1260.627 | 21960.865 |
| 31   | 1266.694 | 2382.128  | 32   | 1274.651 | 10294.676 | 33   | 1282.612 | 925.895   | 34   | 1290.638 | 1527.183   | 35   | 1340.685 | 1537.644  |
| 36   | 1388.720 | 1981.743  | 37   | 1396.814 | 878.548   | 38   | 1442.764 | 2144.462  | 39   | 1475.749 | 1213.376   | 40   | 1482.748 | 829.603   |
| 41   | 1493.739 | 59010.808 | 42   | 1500.737 | 10912.461 | 43   | 1507.750 | 1951.552  | 44   | 1587.834 | 2225.570   | 45   | 1636.834 | 77655.189 |
| 46   | 1651.825 | 4656.694  | 47   | 1657.845 | 380.359   | 48   | 1700.863 | 2457.596  | 49   | 1707.851 | 680.602    | 50   | 1717.908 | 36538.424 |
| 51   | 1774.922 | 757.596   | 52   | 1784.888 | 2825.612  | 53   | 1884.888 | 1898.947  | 54   | 1932.977 | 24085.264  | 55   | 1941.005 | 663.420   |
| 56   | 1948.969 | 2276.209  | 57   | 2079.979 | 4356.947  | 58   | 2211.188 | 2466.645  | 59   | 2221.206 | 423.256    | 60   | 2238.218 | 2044.002  |
| 61   | 2293.256 | 843.197   | 62   | 2313.263 | 402.427   | 63   | 2506.283 | 679.562   | 64   | 2521.318 | 1335.951   | 65   | 2546.245 | 935.866   |
| 66   | 2975.413 | 620.349   | 67   | 3212.642 | 295.400   |      |          |           |      |          |            |      |          |           |

BioTools Version 3.2 Copyright © 1999-2008 Bruker Daltonik GmbH Page -2-



### Area 3. Annotated MS spectrum 2.

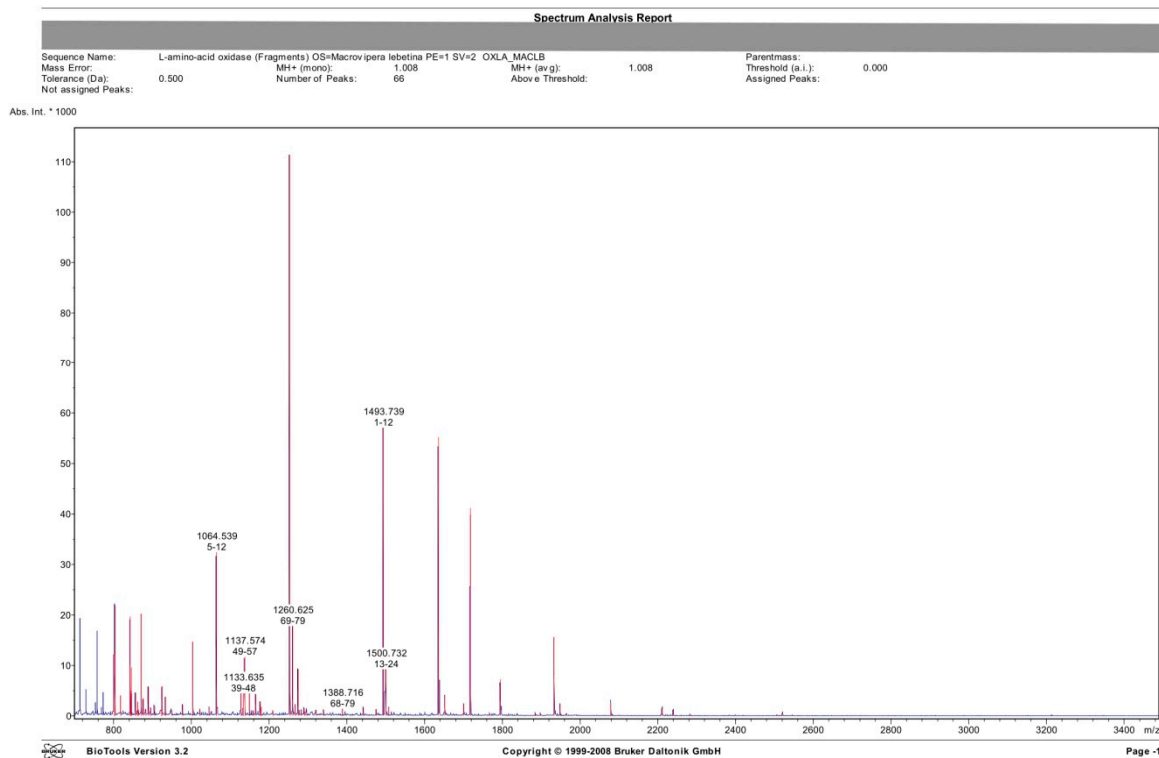

**Spectrum Analysis Report**

---

**Sequence data:**  
 L-amino-acid oxidase (Fragments) OS=Macropira lebetina PE=1 SV=2 OXLA\_MACLB  
 Intensity Coverage: 23.1 % (134117 cnts) Sequence Coverage MS: 51.4%  
 Sequence Coverage MS/MS: 0.0% pl (isoelectric point): 4.4

|                                                                                                                |    |    |    |    |    |    |    |    |     |     |
|----------------------------------------------------------------------------------------------------------------|----|----|----|----|----|----|----|----|-----|-----|
| 10                                                                                                             | 20 | 30 | 40 | 50 | 60 | 70 | 80 | 90 | 100 | 110 |
| ADDYMPLEEC FREDDEYFL KIAENGLGV YANLGNRP VPRSEGGND DIFAYEYDE IVGGHDKRYV EDDGIHQRE TFCYSPMIQR FYQGFHSEA LTAIPVGR |    |    |    |    |    |    |    |    |     |     |

**Display Parameter:**  
 Sequence Name: L-amino-acid oxidase (Fragments) OS=Macropira lebetina PE=1 SV=2 OXLA\_MACLB MH+ (mono): 1.008  
 MH+ (avg): 1.008 Threshold (a.i.): 0.000 Tolerance (Da): 0.500 MH+ (mono): 1.008  
 Number of Peaks: 66

| Peak | Mass     | Intensity | Peak | Mass     | Intensity | Peak | Mass     | Intensity | Peak | Mass     | Intensity  | Peak | Mass     | Intensity |
|------|----------|-----------|------|----------|-----------|------|----------|-----------|------|----------|------------|------|----------|-----------|
| 1    | 801.539  | 12485.222 | 2    | 803.469  | 21929.975 | 3    | 817.517  | 4051.369  | 4    | 842.557  | 19704.285  | 5    | 844.522  | 5000.734  |
| 6    | 845.566  | 9625.394  | 7    | 856.572  | 4644.810  | 8    | 861.541  | 2813.328  | 9    | 864.542  | 1327.577   | 10   | 870.594  | 20315.984 |
| 11   | 876.490  | 3599.005  | 12   | 882.611  | 1308.186  | 13   | 889.601  | 5601.339  | 14   | 895.521  | 1628.658   | 15   | 906.568  | 2017.214  |
| 16   | 922.570  | 1153.900  | 17   | 924.571  | 5911.921  | 18   | 933.628  | 3829.197  | 19   | 949.597  | 1224.110   | 20   | 977.656  | 2239.856  |
| 21   | 1003.599 | 14751.471 | 22   | 1021.685 | 1323.635  | 23   | 1045.676 | 1803.749  | 24   | 1064.539 | 32428.353  | 25   | 1127.635 | 8299.172  |
| 26   | 1133.635 | 4451.103  | 27   | 1137.574 | 11719.966 | 28   | 1145.577 | 4776.456  | 29   | 1159.568 | 685.724    | 30   | 1165.756 | 4264.772  |
| 31   | 1177.641 | 2892.538  | 32   | 1179.655 | 1865.111  | 33   | 1209.678 | 983.587   | 34   | 1252.676 | 114487.674 | 35   | 1260.625 | 17794.880 |
| 36   | 1266.689 | 2196.371  | 37   | 1274.646 | 9249.011  | 38   | 1282.609 | 1237.011  | 39   | 1290.634 | 1577.765   | 40   | 1296.629 | 1263.277  |
| 41   | 1320.650 | 1198.349  | 42   | 1340.676 | 1103.543  | 43   | 1389.716 | 1416.180  | 44   | 1442.767 | 1607.002   | 45   | 1475.763 | 1394.902  |
| 46   | 1493.739 | 57068.551 | 47   | 1500.732 | 9239.986  | 48   | 1507.746 | 1641.049  | 49   | 1635.830 | 55216.924  | 50   | 1657.823 | 3967.873  |
| 51   | 1700.875 | 2502.849  | 52   | 1717.907 | 41154.163 | 53   | 1766.840 | 601.329   | 54   | 1794.882 | 7257.849   | 55   | 1884.971 | 544.302   |
| 56   | 1897.770 | 666.198   | 57   | 1932.976 | 15665.156 | 58   | 1948.968 | 2344.735  | 59   | 1964.968 | 456.660    | 60   | 2079.079 | 2622.723  |
| 61   | 2211.181 | 1551.388  | 62   | 2239.215 | 1123.448  | 63   | 2283.240 | 333.280   | 64   | 2506.269 | 191.921    | 65   | 2521.315 | 644.461   |
| 66   | 3212.620 | 96.315    |      |          |           |      |          |           |      |          |            |      |          |           |

BioTools Version 3.2 Copyright © 1999-2008 Bruker Daltonik GmbH Page -2-

### Area 3. Annotated MS spectrum 3.

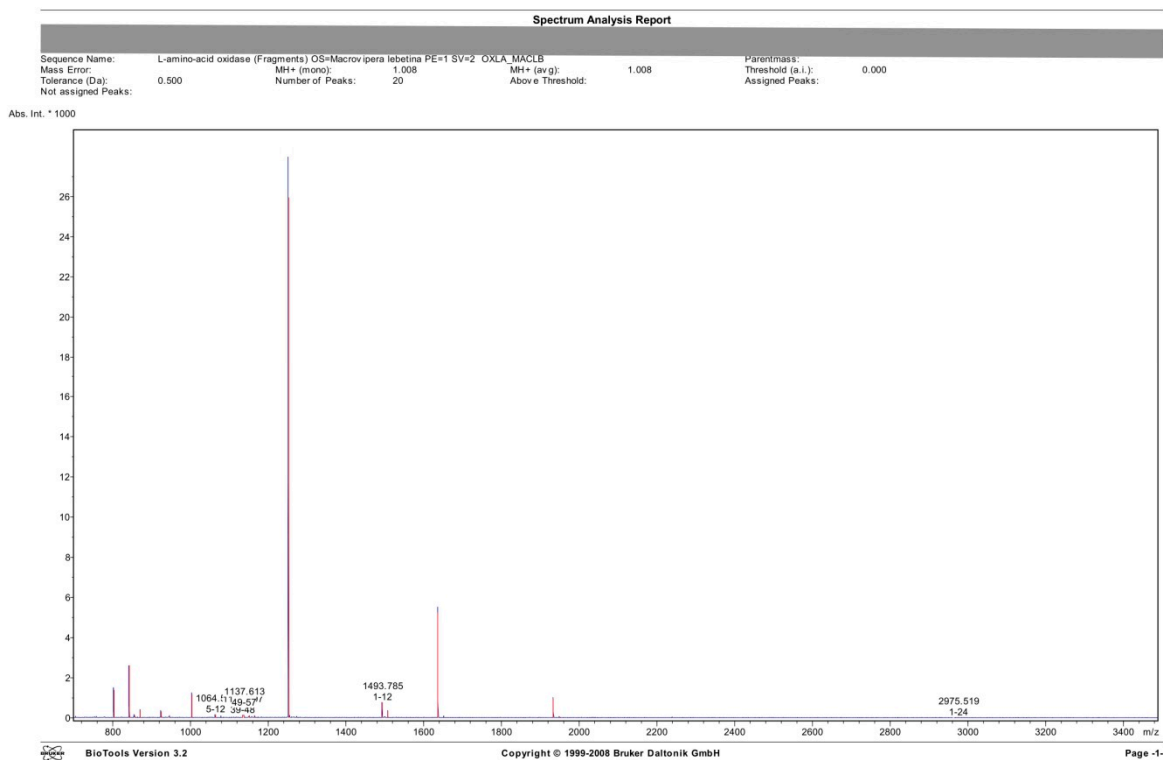

**Spectrum Analysis Report**

---

**Sequence data:**  
 L-amino-acid oxidase (Fragments) OS=Macropipera lebetina PE=1 SV=2 OXLA\_MACLB  
 Intensity Coverage: 4.1% (1659 cnts) Sequence Coverage MS: 40.2%  
 Sequence Coverage MS/MS: 0.0% pI (isoelectric point): 4.4

|           |            |           |           |           |        |     |           |            |            |           |          |
|-----------|------------|-----------|-----------|-----------|--------|-----|-----------|------------|------------|-----------|----------|
| 10        | 20         | 30        | 40        | 50        | 60     | 70  | 80        | 90         | 100        | 110       |          |
| ADDNPLEEC | FREDDYEEFL | KIANKLEGW | YANLGNRYP | VKPEEGEHD | DIFAYE | FDE | IVGGNDKFW | EDDGIROGKE | TFCYSPMIQR | PYQGFHSEA | LTAIPVGR |

**Display Parameter:**  
 Sequence Name: L-amino-acid oxidase (Fragments) OS=Macropipera lebetina PE=1 SV=2 OXLA\_MACLB  
 MH+ (avg): 1.008 Threshold (a.l.): 0.000 Tolerance (Da): 0.500 MH+ (mono): 1.008  
 Number of Peaks: 20

| Peak | Mass     | Intensity | Peak | Mass     | Intensity | Peak | Mass     | Intensity | Peak | Mass     | Intensity | Peak | Mass     | Intensity |
|------|----------|-----------|------|----------|-----------|------|----------|-----------|------|----------|-----------|------|----------|-----------|
| 1    | 803.479  | 1395.612  | 2    | 842.578  | 2929.728  | 3    | 856.593  | 140.920   | 4    | 870.614  | 388.020   | 5    | 924.593  | 337.792   |
| 6    | 946.556  | 64.000    | 7    | 1003.629 | 1171.226  | 8    | 1064.576 | 177.243   | 9    | 1078.378 | 22.000    | 10   | 1133.697 | 143.000   |
| 11   | 1137.613 | 518.253   | 12   | 1151.685 | 118.000   | 13   | 1165.750 | 86.000    | 14   | 1252.718 | 25956.205 | 15   | 1493.785 | 784.806   |
| 16   | 1507.802 | 341.611   | 17   | 1635.673 | 5246.347  | 18   | 1933.017 | 965.499   | 19   | 1948.993 | 69.000    | 20   | 2975.519 | 36.000    |

BioTools Version 3.2 Copyright © 1999-2008 Bruker Daltonik GmbH Page -2-



### Area 4. Annotated MS/MS spectrum of ion 2250.354 m/z.

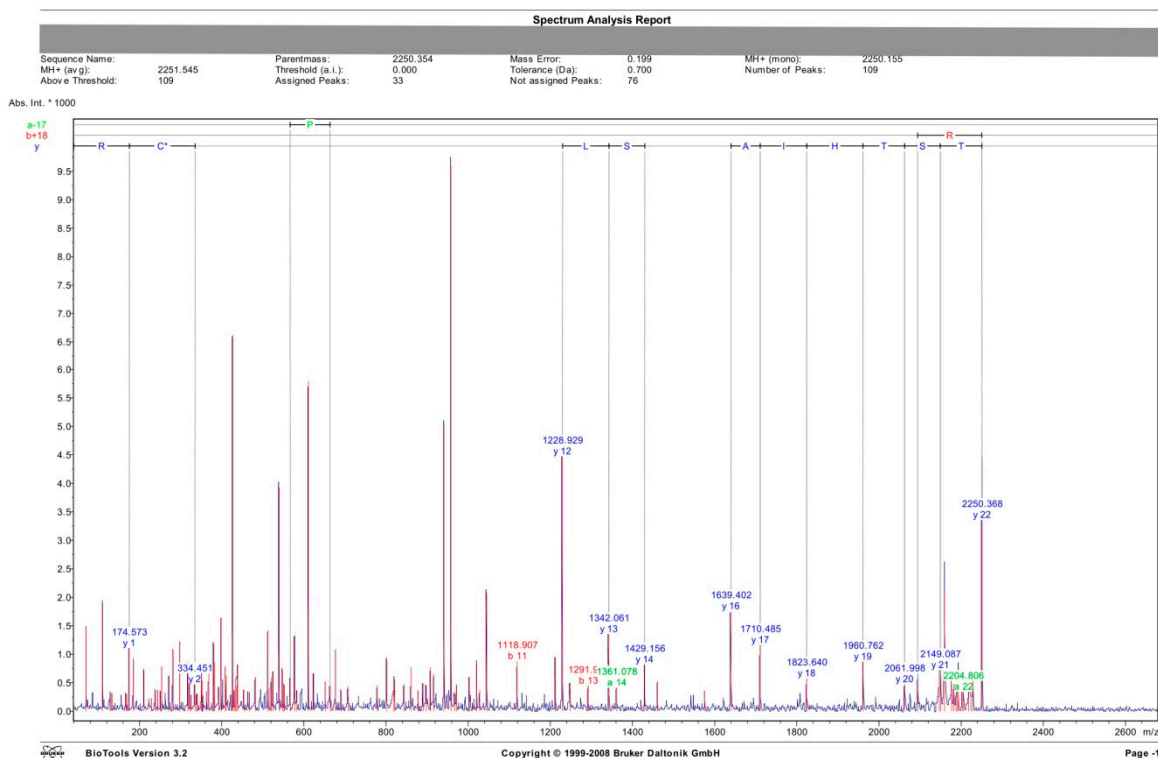

**Spectrum Analysis Report**

Display Parameter: Parentmass: 2250.354 Mass Error: 0.199 MH+ (mono): 2250.155 MH+ (avg): 2251.545  
 Threshold (a.i.): 0.000 Tolerance (Da): 0.700 Number of Peaks: 109 Above Threshold: 109  
 Assigned Peaks: 33 Not assigned Peaks: 76

**Peaklist:**

| Peak | Mass     | Intensity | Peak | Mass     | Intensity | Peak | Mass     | Intensity | Peak | Mass     | Intensity | Peak | Mass     | Intensity |
|------|----------|-----------|------|----------|-----------|------|----------|-----------|------|----------|-----------|------|----------|-----------|
| 1    | 69.704   | 1402.245  | 2    | 109.631  | 1899.934  | 3    | 126.623  | 318.672   | 4    | 132.588  | 298.546   | 5    | 166.582  | 310.720   |
| 6    | 168.570  | 304.675   | 7    | 174.573  | 1104.464  | 8    | 184.542  | 688.851   | 9    | 210.651  | 714.933   | 10   | 228.538  | 231.631   |
| 11   | 238.497  | 359.046   | 12   | 243.499  | 367.326   | 13   | 290.529  | 357.402   | 14   | 253.493  | 770.492   | 15   | 271.469  | 616.343   |
| 16   | 281.494  | 1070.004  | 17   | 297.502  | 1214.483  | 18   | 317.452  | 853.382   | 19   | 321.498  | 496.208   | 20   | 325.486  | 286.637   |
| 21   | 334.451  | 474.168   | 22   | 338.473  | 283.125   | 23   | 340.486  | 305.825   | 24   | 350.487  | 724.860   | 25   | 352.513  | 541.741   |
| 26   | 362.469  | 341.713   | 27   | 368.486  | 755.814   | 28   | 380.486  | 1186.028  | 29   | 382.476  | 857.763   | 30   | 392.518  | 427.618   |
| 31   | 398.473  | 1643.776  | 32   | 408.472  | 792.260   | 33   | 410.581  | 627.543   | 34   | 422.484  | 291.014   | 35   | 426.458  | 6622.632  |
| 36   | 430.504  | 367.853   | 37   | 433.460  | 560.535   | 38   | 435.601  | 448.353   | 39   | 438.469  | 822.118   | 40   | 453.548  | 388.854   |
| 41   | 467.504  | 341.025   | 42   | 481.546  | 598.301   | 43   | 511.514  | 1417.175  | 44   | 514.999  | 395.773   | 45   | 520.466  | 592.171   |
| 46   | 524.506  | 707.346   | 47   | 539.502  | 3926.901  | 48   | 547.595  | 728.977   | 49   | 550.518  | 487.312   | 50   | 552.496  | 457.340   |
| 51   | 586.521  | 811.199   | 52   | 577.487  | 1334.752  | 53   | 582.529  | 370.241   | 54   | 610.534  | 5796.174  | 55   | 623.550  | 660.622   |
| 56   | 651.535  | 528.745   | 57   | 663.625  | 455.657   | 58   | 676.547  | 1091.556  | 59   | 690.638  | 359.435   | 60   | 707.580  | 437.191   |
| 61   | 778.621  | 456.505   | 62   | 801.590  | 903.004   | 63   | 816.688  | 410.378   | 64   | 820.695  | 564.197   | 65   | 843.633  | 477.132   |
| 66   | 880.668  | 767.027   | 67   | 877.687  | 367.342   | 68   | 889.713  | 483.388   | 69   | 897.664  | 450.252   | 70   | 907.726  | 771.392   |
| 71   | 915.692  | 655.178   | 72   | 940.699  | 5027.423  | 73   | 957.700  | 9601.370  | 74   | 966.892  | 348.471   | 75   | 971.672  | 469.104   |
| 76   | 1002.803 | 592.671   | 77   | 1020.775 | 819.767   | 78   | 1027.733 | 378.584   | 79   | 1044.746 | 2082.606  | 80   | 1118.907 | 877.623   |
| 81   | 1211.878 | 945.787   | 82   | 1228.929 | 4471.034  | 83   | 1247.898 | 502.335   | 84   | 1291.986 | 447.530   | 85   | 1342.061 | 1353.576  |
| 86   | 1361.078 | 414.893   | 87   | 1429.156 | 819.754   | 88   | 1460.105 | 519.880   | 89   | 1575.079 | 346.818   | 90   | 1638.402 | 1755.679  |
| 91   | 1710.485 | 1163.936  | 92   | 1823.640 | 576.833   | 93   | 1960.762 | 870.423   | 94   | 2061.998 | 472.485   | 95   | 2093.930 | 546.367   |
| 96   | 2146.371 | 509.175   | 97   | 2149.087 | 720.897   | 98   | 2159.272 | 2115.605  | 99   | 2176.358 | 472.940   | 100  | 2181.962 | 455.090   |
| 101  | 2187.216 | 287.295   | 102  | 2190.309 | 559.340   | 103  | 2192.759 | 395.250   | 104  | 2202.682 | 337.659   | 105  | 2204.806 | 339.764   |
| 106  | 2218.044 | 620.860   | 107  | 2223.850 | 242.034   | 108  | 2229.079 | 541.812   | 109  | 2250.368 | 3356.849  |      |          |           |

**Calculated Masses:**  
 TSTHIAFLSLPSSPPSVGSVCR 21: Carbamidomethyl (C)

| N-Term. | Ion | a        | a-17     | a-18     | b        | b-17     | b-18     | b+18     | c        | i       | x        | y        | z        | C-Term. | Ion |
|---------|-----|----------|----------|----------|----------|----------|----------|----------|----------|---------|----------|----------|----------|---------|-----|
| 1       | T   | 74.060   | 57.033   | 56.049   | 102.055  | 85.028   | 84.044   | 120.066  | 119.082  | 74.060  | 201.098  | 175.119  | 158.092  | 22      | R   |
| 2       | S   | 161.092  | 144.066  | 143.082  | 189.087  | 172.060  | 171.076  | 207.098  | 206.114  | 60.044  | 361.129  | 335.150  | 318.133  | 21      | C*  |
| 3       | T   | 262.140  | 245.113  | 244.129  | 290.135  | 273.108  | 272.124  | 308.145  | 307.161  | 74.060  | 460.197  | 434.218  | 417.191  | 20      | V   |
| 4       | H   | 399.199  | 382.172  | 381.188  | 427.194  | 410.167  | 409.183  | 445.204  | 444.220  | 110.071 | 547.229  | 521.250  | 504.223  | 19      | S   |
| 5       | I   | 512.263  | 495.236  | 494.252  | 540.278  | 523.251  | 522.267  | 558.288  | 557.304  | 86.096  | 694.251  | 678.272  | 661.245  | 18      | G   |
| 6       | A   | 583.320  | 566.293  | 565.309  | 611.315  | 594.288  | 593.304  | 629.325  | 628.341  | 44.040  | 703.319  | 677.340  | 660.313  | 17      | V   |
| 7       | P   | 680.373  | 663.346  | 662.362  | 708.368  | 691.341  | 690.357  | 726.378  | 725.394  | 70.065  | 790.351  | 764.372  | 747.345  | 16      | S   |
| 8       | L   | 793.457  | 776.430  | 775.446  | 821.452  | 804.425  | 803.441  | 839.462  | 838.478  | 86.096  | 887.404  | 861.425  | 844.398  | 15      | P   |
| 9       | S   | 880.489  | 863.462  | 862.478  | 908.484  | 891.457  | 890.473  | 926.494  | 925.510  | 60.044  | 984.457  | 958.477  | 941.451  | 14      | P   |
| 10      | L   | 993.573  | 976.546  | 975.562  | 1021.568 | 1004.541 | 1003.557 | 1039.578 | 1038.594 | 86.096  | 1071.489 | 1045.510 | 1028.483 | 13      | S   |
| 11      | P   | 1060.626 | 1043.599 | 1042.615 | 1116.620 | 1101.594 | 1100.610 | 1136.631 | 1135.647 | 70.065  | 1158.621 | 1132.642 | 1115.615 | 12      | S   |
| 12      | S   | 1174.688 | 1160.631 | 1159.647 | 1205.652 | 1189.626 | 1187.642 | 1223.663 | 1222.679 | 60.044  | 1255.674 | 1229.694 | 1212.668 | 11      | P   |
| 13      | S   | 1264.690 | 1247.663 | 1246.679 | 1292.684 | 1275.658 | 1274.674 | 1310.695 | 1309.711 | 60.044  | 1368.658 | 1342.678 | 1325.652 | 10      | L   |
| 14      | P   | 1361.742 | 1344.716 | 1343.732 | 1389.737 | 1372.711 | 1371.727 | 1407.748 | 1406.764 | 70.065  | 1455.690 | 1429.710 | 1412.684 | 9       | S   |
| 15      | P   | 1458.795 | 1441.769 | 1440.785 | 1486.790 | 1469.763 | 1468.779 | 1504.791 | 1503.807 | 70.065  | 1568.774 | 1542.794 | 1525.768 | 8       | L   |
| 16      | S   | 1545.827 | 1528.801 | 1527.817 | 1573.822 | 1556.795 | 1555.811 | 1591.833 | 1590.849 | 60.044  | 1665.826 | 1639.847 | 1622.821 | 7       | P   |
| 17      | V   | 1644.896 | 1627.869 | 1626.885 | 1672.890 | 1655.864 | 1654.880 | 1690.901 | 1689.917 | 72.081  | 1736.864 | 1710.884 | 1693.858 | 6       | A   |
| 18      | G   | 1701.917 | 1684.890 | 1683.906 | 1729.912 | 1712.885 | 1711.901 | 1747.922 | 1746.938 | 30.034  | 1849.848 | 1823.868 | 1806.842 | 5       | I   |
| 19      | S   | 1788.949 | 1771.922 | 1770.938 | 1816.944 | 1799.917 | 1798.933 | 1834.955 | 1833.971 | 60.044  | 1987.007 | 1961.027 | 1944.001 | 4       | H   |
| 20      | V   | 1888.017 | 1871.991 | 1870.007 | 1916.012 | 1898.986 | 1898.002 | 1934.023 | 1933.039 | 72.081  | 2098.054 | 2062.074 | 2045.048 | 3       | T   |
| 21      | C*  | 2048.048 | 2031.022 | 2030.038 | 2076.043 | 2059.016 | 2058.032 | 2094.054 | 2093.070 | 133.043 | 2113.086 | 2109.107 | 2102.080 | 2       | S   |
| 22      | R   | 2204.149 | 2187.123 | 2186.139 | 2232.144 | 2215.118 | 2214.134 | 2250.155 | 2249.171 | 129.113 | 2276.134 | 2250.155 | 2233.128 | 1       | T   |

Area 4. Annotated MS/MS spectrum of ion 1174.611 m/z.

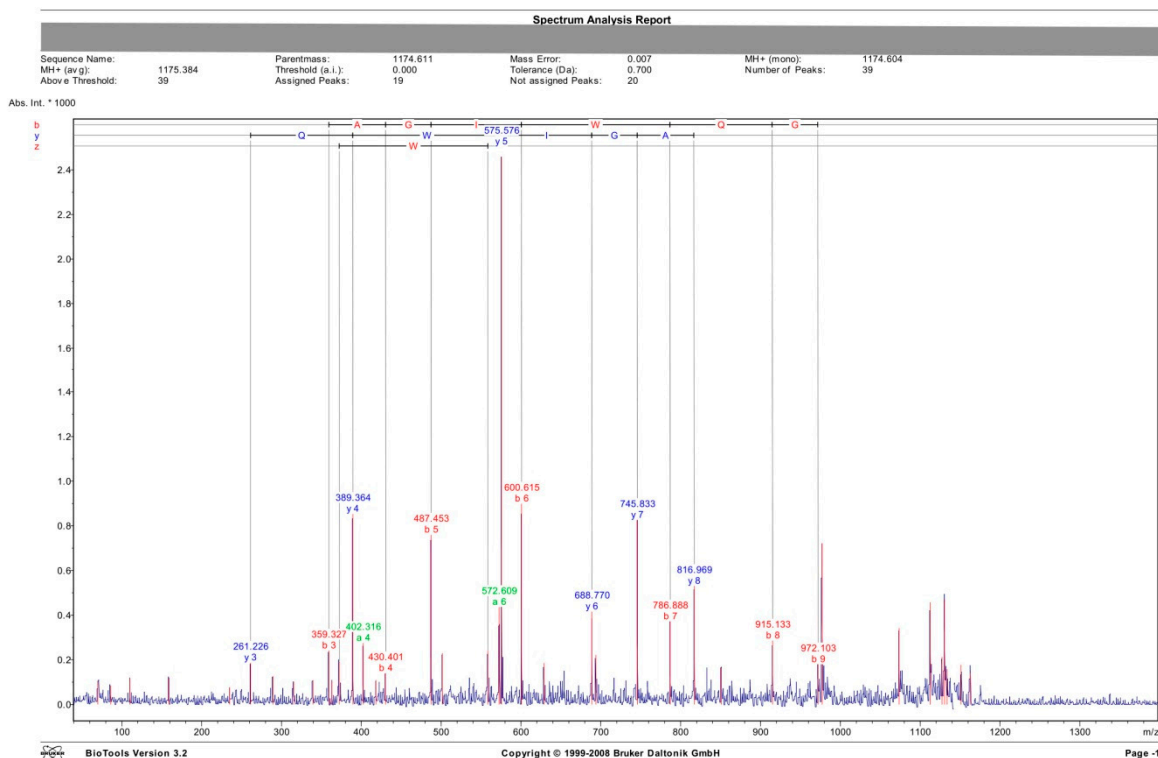

**Spectrum Analysis Report**

**Display Parameter:**

|                   |          |                     |       |                  |          |                  |          |
|-------------------|----------|---------------------|-------|------------------|----------|------------------|----------|
| Parentmass:       | 1174.611 | Mass Error:         | 0.007 | MH+ (mono):      | 1174.604 | MH+ (avg):       | 1175.384 |
| Threshold (a.i.): | 0.000    | Tolerance (Da):     | 0.700 | Number of Peaks: | 39       | Above Threshold: | 39       |
| Assigned Peaks:   | 19       | Not assigned Peaks: | 20    |                  |          |                  |          |

**Peaklist:**

| Peak | Mass     | Intensity | Peak | Mass     | Intensity | Peak | Mass     | Intensity | Peak | Mass     | Intensity | Peak | Mass     | Intensity |
|------|----------|-----------|------|----------|-----------|------|----------|-----------|------|----------|-----------|------|----------|-----------|
| 1    | 70.050   | 101.997   | 2    | 86.072   | 85.428    | 3    | 110.052  | 115.615   | 4    | 159.122  | 120.026   | 5    | 235.150  | 77.562    |
| 6    | 261.226  | 187.337   | 7    | 289.217  | 127.517   | 8    | 315.294  | 103.203   | 9    | 339.324  | 109.214   | 10   | 366.327  | 241.524   |
| 11   | 363.316  | 106.219   | 12   | 372.354  | 192.287   | 13   | 389.364  | 853.476   | 14   | 402.316  | 275.784   | 15   | 418.353  | 109.686   |
| 16   | 430.401  | 140.629   | 17   | 487.453  | 780.209   | 18   | 501.477  | 229.955   | 19   | 558.522  | 241.919   | 20   | 572.609  | 436.554   |
| 21   | 575.576  | 2504.424  | 22   | 600.615  | 899.837   | 23   | 628.666  | 185.865   | 24   | 688.770  | 416.275   | 25   | 693.785  | 222.439   |
| 26   | 745.833  | 825.995   | 27   | 786.888  | 372.179   | 28   | 816.969  | 530.552   | 29   | 851.051  | 166.463   | 30   | 915.133  | 286.600   |
| 31   | 972.103  | 180.034   | 32   | 977.216  | 722.841   | 33   | 1073.466 | 342.881   | 34   | 1112.526 | 457.598   | 35   | 1127.186 | 213.070   |
| 36   | 1130.557 | 470.899   | 37   | 1133.770 | 158.144   | 38   | 1151.241 | 177.595   | 39   | 1162.446 | 142.045   |      |          |           |

**Calculated Masses:**  
VVCAGINWGGK 3: Carbamidomethyl (C)

| N-Term | Ion | a        | a-17     | a-18     | b        | b-17     | b-18     | b+18     | c        | i       | x        | y        | z        | C-Term | Ion |
|--------|-----|----------|----------|----------|----------|----------|----------|----------|----------|---------|----------|----------|----------|--------|-----|
| 1      | V   | 72.081   | 55.054   | 54.070   | 100.076  | 83.049   | 82.065   | 118.086  | 117.102  | 72.081  | 173.092  | 147.113  | 130.086  | 11     | K   |
| 2      | V   | 171.149  | 154.123  | 153.139  | 199.144  | 182.118  | 181.134  | 217.155  | 216.171  | 72.081  | 230.114  | 204.134  | 187.108  | 10     | G   |
| 3      | C+  | 331.180  | 314.153  | 313.169  | 359.175  | 342.148  | 341.164  | 377.185  | 376.201  | 133.043 | 287.135  | 261.156  | 244.129  | 9      | G   |
| 4      | A   | 482.217  | 385.190  | 384.206  | 430.212  | 413.185  | 412.201  | 448.222  | 447.238  | 44.049  | 415.194  | 389.214  | 372.188  | 8      | Q   |
| 5      | G   | 459.238  | 442.212  | 441.228  | 487.233  | 470.207  | 469.223  | 505.244  | 504.260  | 30.034  | 601.273  | 575.294  | 558.267  | 7      | W   |
| 6      | I   | 572.322  | 555.296  | 554.312  | 600.317  | 583.291  | 582.307  | 618.328  | 617.344  | 86.096  | 714.357  | 688.378  | 671.351  | 6      | I   |
| 7      | W   | 758.402  | 741.375  | 740.391  | 786.397  | 769.370  | 768.386  | 804.407  | 803.423  | 159.092 | 771.376  | 745.399  | 728.373  | 5      | G   |
| 8      | Q   | 896.460  | 869.434  | 868.450  | 914.455  | 897.429  | 896.445  | 932.466  | 931.482  | 101.071 | 842.416  | 816.436  | 799.410  | 4      | A   |
| 9      | G   | 943.482  | 926.455  | 925.471  | 971.477  | 954.450  | 953.466  | 989.487  | 988.503  | 30.034  | 1002.446 | 976.467  | 959.440  | 3      | C+  |
| 10     | G   | 1000.503 | 983.477  | 982.493  | 1028.498 | 1011.472 | 1010.488 | 1046.509 | 1045.525 | 30.034  | 1101.515 | 1075.535 | 1058.508 | 2      | V   |
| 11     | K   | 1128.588 | 1111.572 | 1110.588 | 1156.593 | 1139.567 | 1138.583 | 1174.604 | 1173.620 | 101.107 | 1200.583 | 1174.604 | 1157.577 | 1      | V   |

BioTools Version 3.2 Copyright © 1999-2008 Bruker Daltonik GmbH Page -2-

Area 4. Annotated MS/MS spectrum of ion 1235.644 m/z.

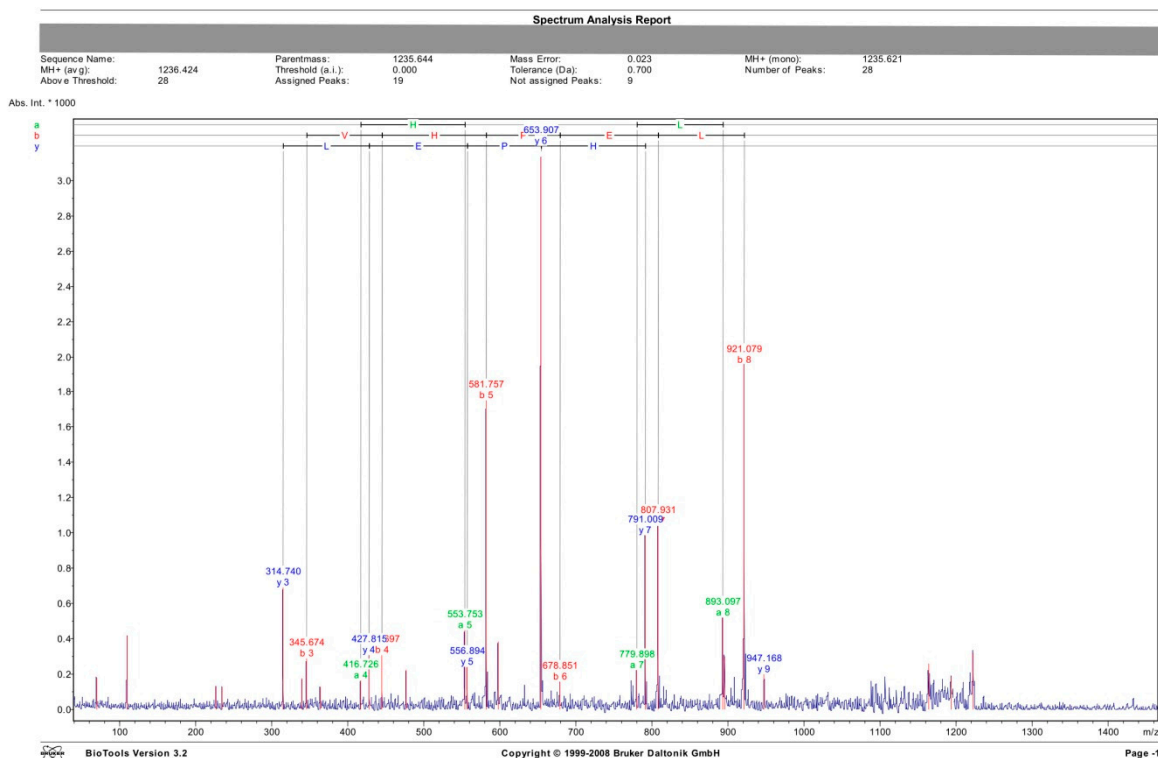

**Spectrum Analysis Report**

|                           |  |                   |          |                     |       |                  |          |                  |          |
|---------------------------|--|-------------------|----------|---------------------|-------|------------------|----------|------------------|----------|
| <b>Display Parameter:</b> |  | Parentmass:       | 1235.644 | Mass Error:         | 0.023 | MH+ (mono):      | 1235.621 | MH+ (avg):       | 1236.424 |
|                           |  | Threshold (a.i.): | 0.000    | Tolerance (Da):     | 0.700 | Number of Peaks: | 28       | Above Threshold: | 28       |
|                           |  | Assigned Peaks:   | 19       | Not assigned Peaks: | 9     |                  |          |                  |          |

| Peak | Mass     | Intensity | Peak | Mass     | Intensity | Peak | Mass     | Intensity | Peak | Mass    | Intensity | Peak | Mass    | Intensity |
|------|----------|-----------|------|----------|-----------|------|----------|-----------|------|---------|-----------|------|---------|-----------|
| 1    | 69.801   | 161.133   | 2    | 109.748  | 418.087   | 3    | 226.681  | 132.129   | 4    | 234.701 | 128.984   | 5    | 314.740 | 690.275   |
| 6    | 339.725  | 177.557   | 7    | 345.674  | 288.488   | 8    | 363.688  | 129.053   | 9    | 416.726 | 164.709   | 10   | 427.815 | 308.084   |
| 11   | 444.697  | 307.910   | 12   | 476.743  | 225.134   | 13   | 553.753  | 448.557   | 14   | 556.894 | 241.612   | 15   | 581.757 | 1749.883  |
| 16   | 597.762  | 385.589   | 17   | 653.907  | 3196.813  | 18   | 678.851  | 157.215   | 19   | 779.898 | 223.123   | 20   | 791.009 | 986.103   |
| 21   | 807.931  | 1038.627  | 22   | 893.097  | 518.896   | 23   | 896.815  | 301.869   | 24   | 921.079 | 1955.864  | 25   | 947.168 | 199.627   |
| 26   | 1163.943 | 259.224   | 27   | 1193.662 | 184.929   | 28   | 1222.296 | 321.576   |      |         |           |      |         |           |

**Calculated Masses:**  
CQGVHPELPAK 1: Carbamidomethyl (C)

| N-Term | Ion | a        | a-17     | a-18     | b        | b-17     | b-18     | b+18     | c        | i       | x        | y        | z        | C-Term | Ion |
|--------|-----|----------|----------|----------|----------|----------|----------|----------|----------|---------|----------|----------|----------|--------|-----|
| 1      | C*  | 133.043  | 116.016  | 115.032  | 161.038  | 144.011  | 143.027  | 179.048  | 178.064  | 133.043 | 173.092  | 147.113  | 130.086  | 11     | K   |
| 2      | Q   | 261.102  | 244.075  | 243.091  | 289.097  | 272.070  | 271.086  | 307.107  | 306.123  | 101.071 | 244.129  | 218.150  | 201.123  | 10     | A   |
| 3      | G   | 318.123  | 301.097  | 300.112  | 346.118  | 329.091  | 328.107  | 364.129  | 363.145  | 30.034  | 341.182  | 315.203  | 298.176  | 9      | P   |
| 4      | V   | 417.191  | 400.165  | 399.181  | 445.186  | 428.160  | 427.176  | 463.197  | 462.213  | 72.081  | 454.266  | 428.287  | 411.260  | 8      | L   |
| 5      | H   | 554.250  | 537.224  | 536.240  | 582.245  | 565.219  | 564.235  | 600.256  | 599.272  | 110.071 | 583.309  | 557.329  | 540.303  | 7      | E   |
| 6      | P   | 651.303  | 634.277  | 633.293  | 679.298  | 662.272  | 661.287  | 697.309  | 696.325  | 70.065  | 680.361  | 654.382  | 637.356  | 6      | P   |
| 7      | E   | 780.346  | 763.319  | 762.335  | 808.341  | 791.314  | 790.330  | 826.351  | 825.367  | 102.055 | 817.420  | 791.441  | 774.414  | 5      | H   |
| 8      | L   | 893.430  | 876.403  | 875.419  | 921.425  | 904.398  | 903.414  | 939.435  | 938.451  | 86.096  | 916.489  | 890.509  | 873.483  | 4      | V   |
| 9      | P   | 990.463  | 973.436  | 972.452  | 1018.477 | 1001.451 | 1000.467 | 1036.488 | 1035.504 | 70.065  | 973.510  | 947.531  | 930.504  | 3      | G   |
| 10     | A   | 1081.520 | 1064.493 | 1063.509 | 1089.515 | 1072.488 | 1071.504 | 1107.525 | 1106.541 | 44.049  | 1101.569 | 1075.589 | 1058.563 | 2      | Q   |
| 11     | K   | 1189.615 | 1172.588 | 1171.604 | 1217.610 | 1200.583 | 1199.599 | 1235.620 | 1234.636 | 101.107 | 1261.599 | 1235.620 | 1218.594 | 1      | C*  |

BioTools Version 3.2 Copyright © 1999-2008 Bruker Daltonik GmbH Page -2-

### Area 4. Annotated MS spectrum 1.

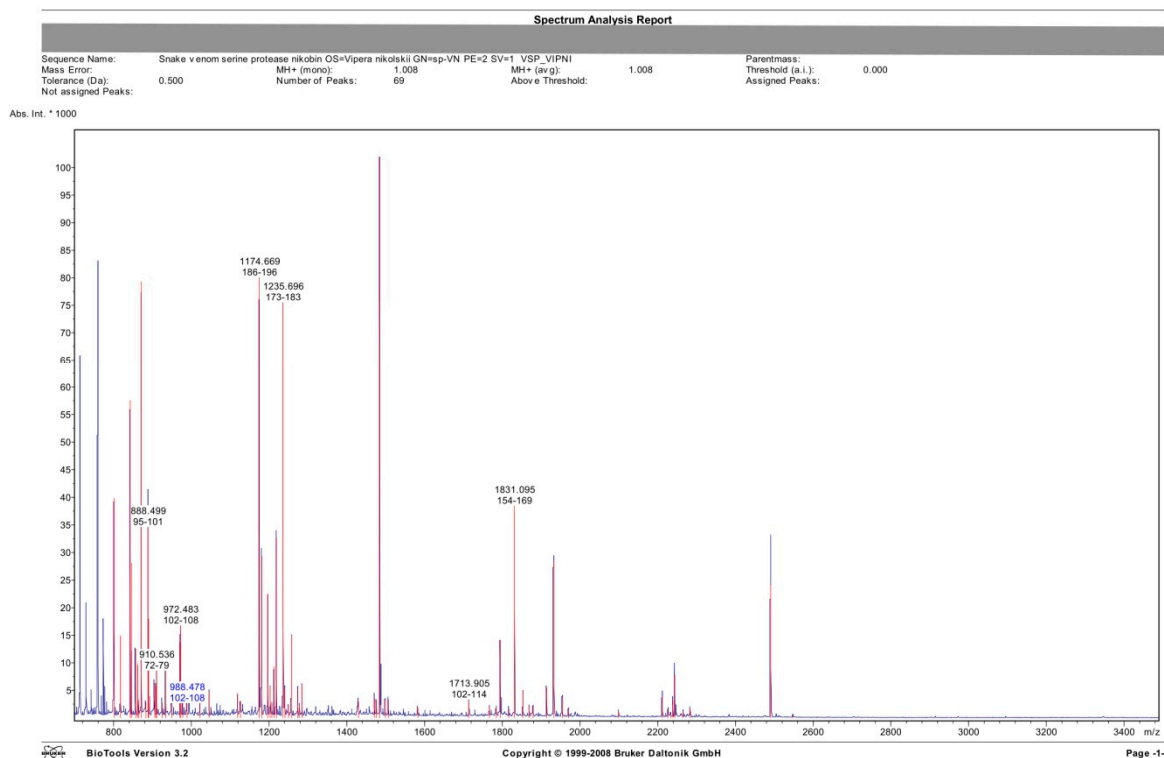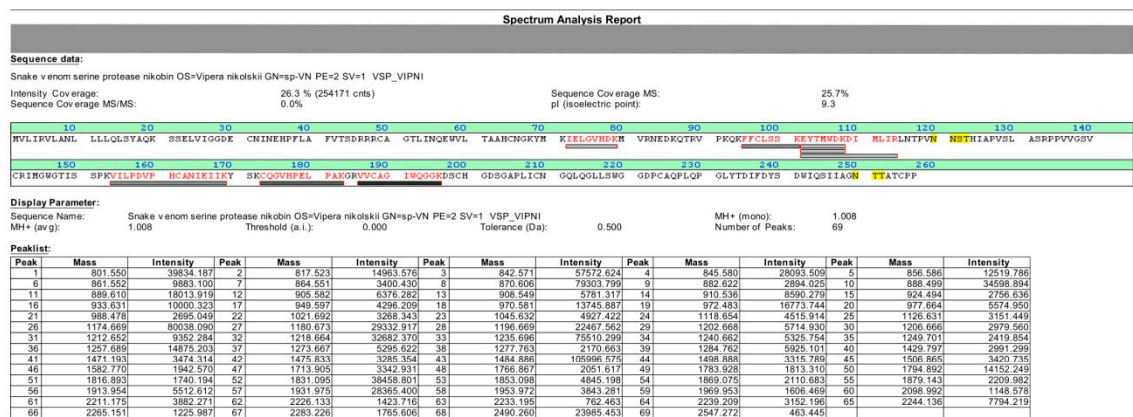

### Area 4. Annotated MS spectrum 2.

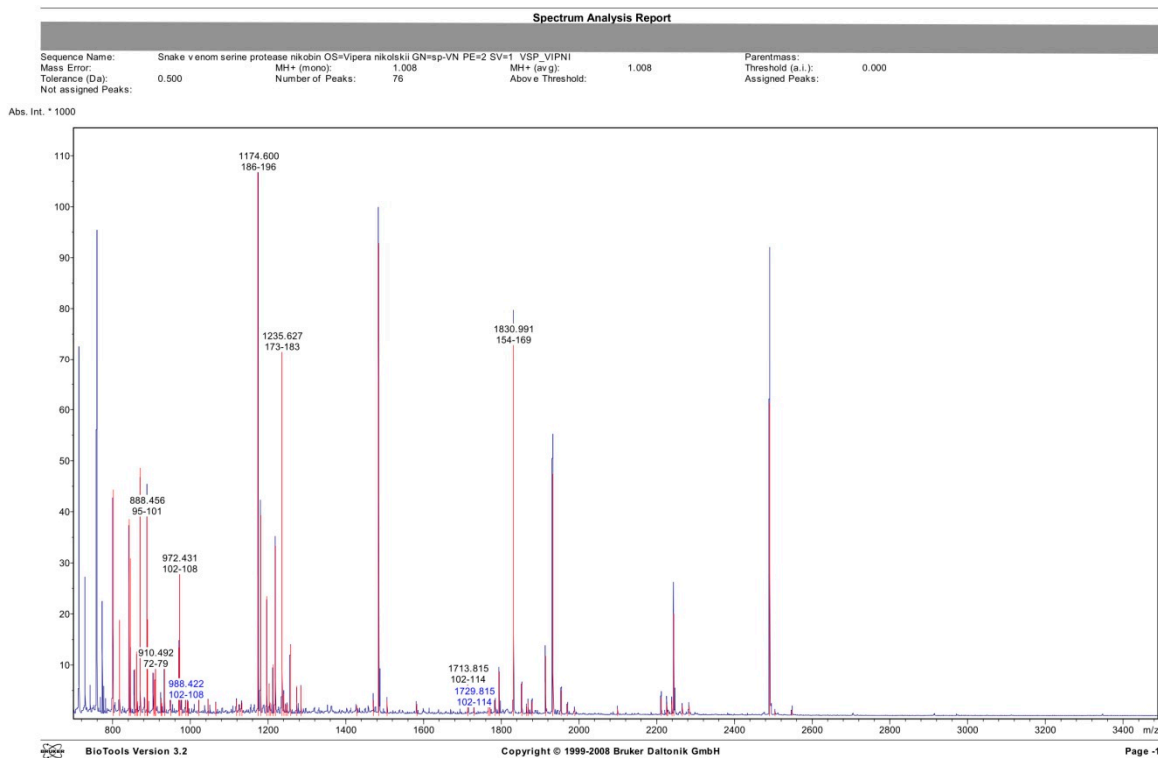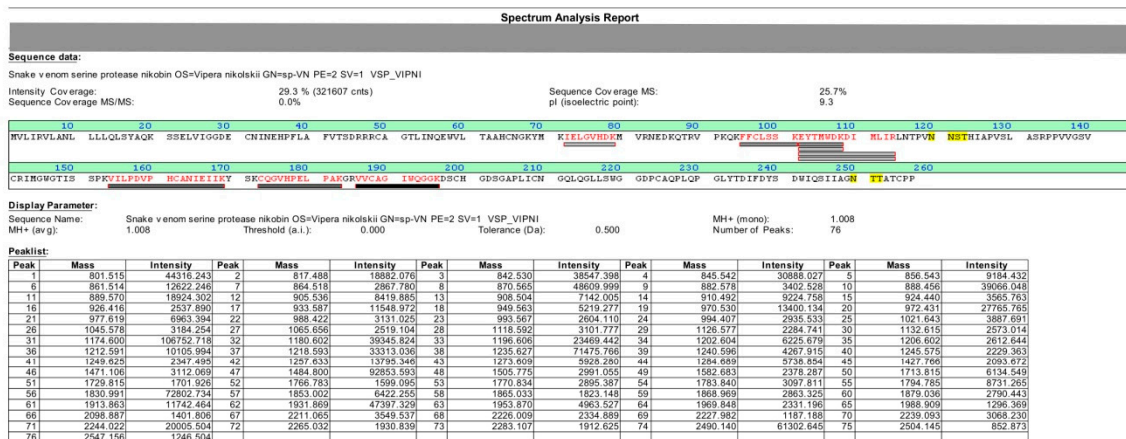

Area 4. Annotated MS/MS spectrum of ion 972.471 m/z.

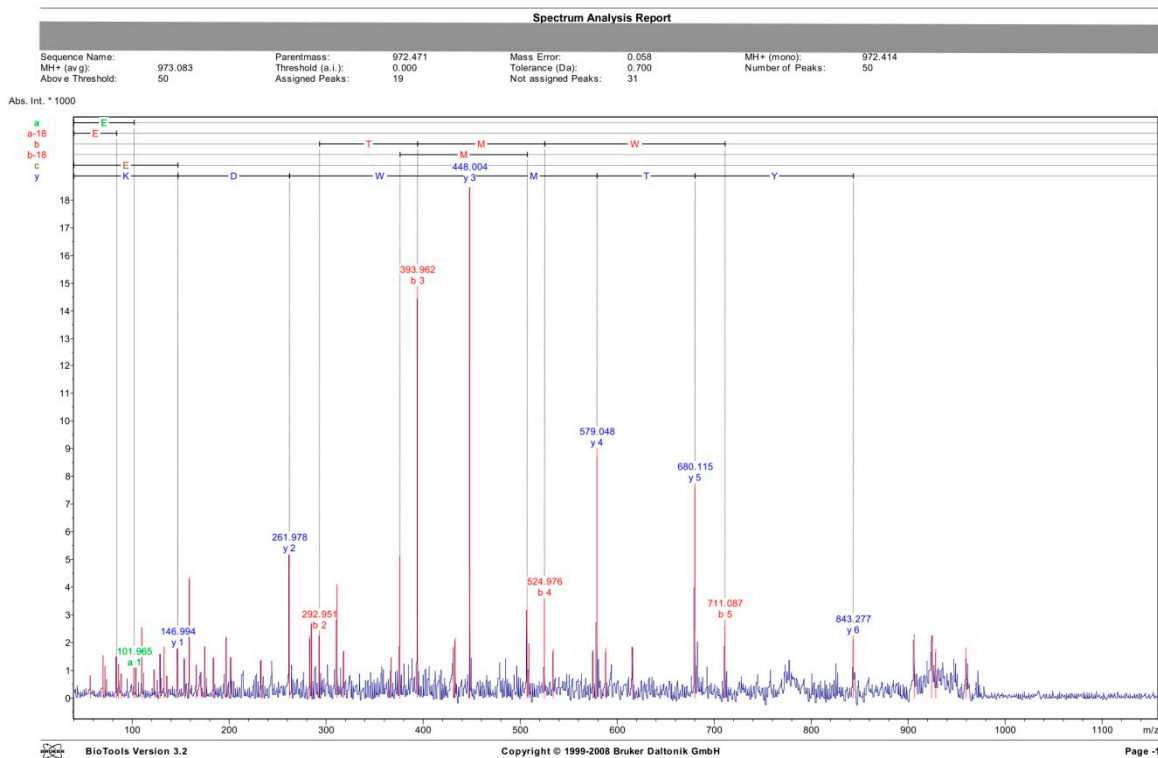

**Spectrum Analysis Report**

**Display Parameter:**

|                   |         |                     |       |                  |         |                  |         |
|-------------------|---------|---------------------|-------|------------------|---------|------------------|---------|
| Parentmass:       | 972.471 | Mass Error:         | 0.058 | MH+ (mono):      | 972.414 | MH+ (avg):       | 973.083 |
| Threshold (a.i.): | 0.000   | Tolerance (Da):     | 0.700 | Number of Peaks: | 50      | Above Threshold: | 50      |
| Assigned Peaks:   | 19      | Not assigned Peaks: | 31    |                  |         |                  |         |

**Peaklist:**

| Peak | Mass    | Intensity | Peak | Mass    | Intensity | Peak | Mass    | Intensity | Peak | Mass    | Intensity | Peak | Mass    | Intensity |
|------|---------|-----------|------|---------|-----------|------|---------|-----------|------|---------|-----------|------|---------|-----------|
| 1    | 56.973  | 829.496   | 2    | 69.981  | 1503.596  | 3    | 72.001  | 1155.524  | 4    | 83.980  | 1474.844  | 5    | 85.981  | 1169.402  |
| 6    | 88.982  | 888.984   | 7    | 101.985 | 1101.256  | 8    | 103.970 | 1549.259  | 9    | 109.983 | 2518.579  | 10   | 122.984 | 1031.981  |
| 11   | 128.998 | 1603.410  | 12   | 132.964 | 1862.959  | 13   | 135.971 | 802.770   | 14   | 148.994 | 1819.768  | 15   | 153.972 | 1441.114  |
| 16   | 158.975 | 4372.663  | 17   | 165.994 | 1217.130  | 18   | 170.963 | 961.834   | 19   | 174.975 | 1856.325  | 20   | 183.976 | 1486.099  |
| 21   | 198.994 | 2240.548  | 22   | 201.989 | 1494.273  | 23   | 232.968 | 1395.919  | 24   | 261.978 | 5217.831  | 25   | 283.982 | 2258.590  |
| 26   | 285.023 | 2745.510  | 27   | 292.951 | 2443.301  | 28   | 311.134 | 4119.538  | 29   | 317.993 | 1721.690  | 30   | 367.039 | 1492.483  |
| 31   | 375.980 | 5222.764  | 32   | 393.962 | 14905.571 | 33   | 431.000 | 1866.568  | 34   | 432.954 | 2174.708  | 35   | 448.004 | 18619.124 |
| 36   | 506.989 | 3104.571  | 37   | 508.993 | 1839.848  | 38   | 524.976 | 3821.844  | 39   | 533.975 | 1799.542  | 40   | 575.058 | 1741.696  |
| 41   | 579.048 | 9031.054  | 42   | 588.027 | 1820.581  | 43   | 616.031 | 1820.650  | 44   | 680.115 | 7760.318  | 45   | 711.087 | 2834.050  |
| 46   | 843.277 | 2264.893  | 47   | 906.090 | 2202.201  | 48   | 923.995 | 2249.990  | 49   | 928.423 | 1777.919  | 50   | 959.645 | 1828.821  |

**Calculated Masses:**  
EYTMWDK

| N-Term | Ion | a       | a-17    | a-18    | b       | b-17    | b-18    | b+18    | c       | i       | x       | y       | z       | C-Term | Ion |
|--------|-----|---------|---------|---------|---------|---------|---------|---------|---------|---------|---------|---------|---------|--------|-----|
| 1      | E   | 162.055 | 85.028  | 84.044  | 130.050 | 113.023 | 112.039 | 148.060 | 147.076 | 102.055 | 173.092 | 147.113 | 130.086 | 7      | K   |
| 2      | Y   | 285.118 | 248.082 | 247.108 | 393.113 | 278.087 | 275.103 | 311.124 | 310.140 | 106.076 | 288.119 | 282.140 | 245.113 | 6      | D   |
| 3      | Y   | 386.166 | 349.139 | 348.155 | 394.161 | 377.134 | 376.150 | 412.171 | 411.187 | 74.060  | 474.198 | 448.219 | 431.193 | 5      | W   |
| 4      | M   | 497.206 | 480.180 | 479.196 | 525.201 | 508.175 | 507.191 | 543.212 | 542.228 | 104.053 | 605.239 | 578.260 | 562.233 | 4      | M   |
| 5      | W   | 683.286 | 666.259 | 665.275 | 711.281 | 694.254 | 693.270 | 729.291 | 728.307 | 159.092 | 796.286 | 680.307 | 663.281 | 3      | Y   |
| 6      | D   | 798.313 | 781.286 | 780.302 | 826.308 | 809.281 | 808.297 | 844.318 | 843.334 | 88.039  | 889.350 | 843.371 | 826.344 | 2      | Y   |
| 7      | K   | 926.408 | 909.381 | 908.397 | 954.403 | 937.376 | 936.392 | 972.413 | 971.429 | 101.107 | 998.392 | 972.413 | 955.387 | 1      | E   |

BioTools Version 3.2 Copyright © 1999-2008 Bruker Daltonik GmbH Page -2-



Area 4. Annotated MS/MS spectrum of ion 1831.064 m/z.

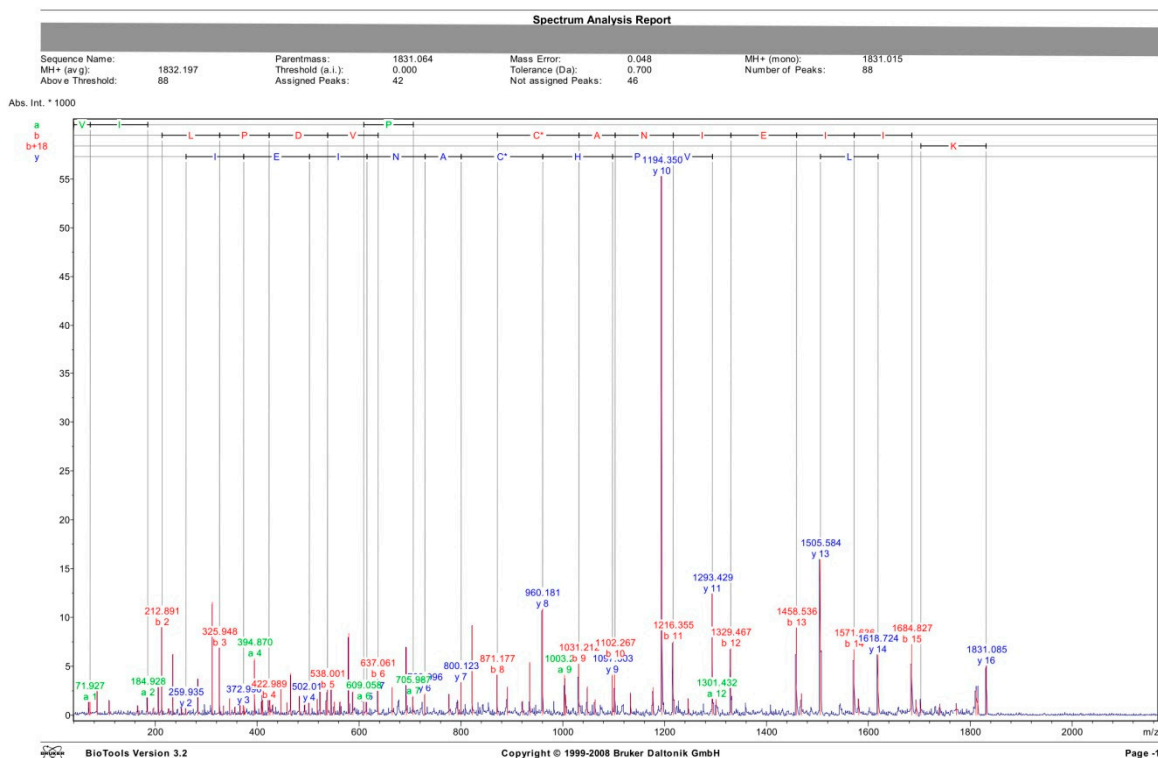

**Spectrum Analysis Report**

Display Parameter: Parentmass: 1831.064 Mass Error: 0.048 MH+ (mono): 1831.015 MH+ (avg): 1832.197  
 Threshold (a.i.): 0.000 Tolerance (Da): 0.700 Number of Peaks: 88 Above Threshold: 88  
 Assigned Peaks: 42 Not assigned Peaks: 46

**Peaklist:**

| Peak | Mass     | Intensity | Peak | Mass     | Intensity | Peak | Mass     | Intensity | Peak | Mass     | Intensity | Peak | Mass     | Intensity |  |
|------|----------|-----------|------|----------|-----------|------|----------|-----------|------|----------|-----------|------|----------|-----------|--|
| 1    | 69.907   | 1966.970  | 2    | 71.927   | 1351.950  | 3    | 85.934   | 3142.713  | 4    | 109.870  | 1481.515  | 5    | 166.834  | 960.110   |  |
| 6    | 184.926  | 1810.875  | 7    | 198.895  | 806.856   | 8    | 206.876  | 2861.971  | 9    | 212.891  | 8969.850  | 10   | 226.920  | 684.187   |  |
| 11   | 234.872  | 6288.193  | 12   | 251.891  | 1148.003  | 13   | 259.935  | 714.319   | 14   | 283.905  | 3763.893  | 15   | 311.868  | 11589.454 |  |
| 16   | 325.948  | 6902.517  | 17   | 333.911  | 912.807   | 18   | 345.849  | 1737.566  | 19   | 356.928  | 875.041   | 20   | 366.879  | 1967.455  |  |
| 21   | 372.966  | 1074.525  | 22   | 374.914  | 887.414   | 23   | 384.870  | 6798.055  | 24   | 408.927  | 1441.182  | 25   | 410.927  | 2142.645  |  |
| 26   | 422.989  | 1542.229  | 27   | 424.952  | 2625.377  | 28   | 430.896  | 1107.935  | 29   | 448.967  | 3578.328  | 30   | 458.881  | 1312.167  |  |
| 31   | 465.890  | 4306.174  | 32   | 462.906  | 1999.816  | 33   | 493.954  | 1093.310  | 34   | 502.019  | 1279.171  | 35   | 517.981  | 1675.845  |  |
| 36   | 523.997  | 3056.916  | 37   | 538.923  | 1475.297  | 38   | 538.001  | 2600.792  | 39   | 545.950  | 3315.117  | 40   | 551.930  | 1409.807  |  |
| 41   | 562.927  | 1410.641  | 42   | 579.907  | 8401.381  | 43   | 587.942  | 2445.924  | 44   | 609.058  | 1418.051  | 45   | 615.067  | 1363.506  |  |
| 46   | 637.061  | 3697.697  | 47   | 664.999  | 2908.010  | 48   | 692.992  | 6947.665  | 49   | 705.987  | 1966.974  | 50   | 729.996  | 2237.539  |  |
| 51   | 777.044  | 2149.433  | 52   | 794.060  | 1416.023  | 53   | 800.123  | 3384.932  | 54   | 822.032  | 9137.087  | 55   | 871.177  | 4135.491  |  |
| 56   | 891.061  | 2927.755  | 57   | 921.092  | 1470.341  | 58   | 935.112  | 5451.750  | 59   | 960.181  | 10875.962 | 60   | 1003.246 | 4128.474  |  |
| 61   | 1006.231 | 2143.709  | 62   | 1031.212 | 5278.714  | 63   | 1046.211 | 2974.510  | 64   | 1063.335 | 1603.712  | 65   | 1097.303 | 4151.842  |  |
| 66   | 1102.267 | 5750.599  | 67   | 1133.266 | 2166.408  | 68   | 1177.307 | 2883.056  | 69   | 1194.350 | 55309.862 | 70   | 1216.355 | 7562.069  |  |
| 71   | 1246.337 | 1641.877  | 72   | 1293.429 | 12425.309 | 73   | 1301.432 | 1656.863  | 74   | 1329.467 | 6849.995  | 75   | 1458.536 | 8963.918  |  |
| 76   | 1468.873 | 2235.222  | 77   | 1505.584 | 15980.754 | 78   | 1571.636 | 6769.149  | 79   | 1581.118 | 1655.940  | 80   | 1618.724 | 6205.549  |  |
| 81   | 1684.827 | 7240.957  | 82   | 1693.399 | 1482.703  | 83   | 1702.832 | 1381.715  | 84   | 1740.200 | 961.052   | 85   | 1772.879 | 956.534   |  |
| 86   | 1811.148 | 2635.460  | 87   | 1814.570 | 1710.355  | 88   | 1831.085 | 5062.948  |      |          |           |      |          |           |  |

**Calculated Masses:**  
 VILPDPVHCANIELIK 9: Carbamidomethyl (C)

| N-Term | Ion | a        | a-17     | a-18     | b        | b-17     | b-18     | b+18     | c        | i       | x        | y        | z        | C-Term | Ion |
|--------|-----|----------|----------|----------|----------|----------|----------|----------|----------|---------|----------|----------|----------|--------|-----|
| 1      | I   | 72.081   | 55.054   | 54.070   | 100.076  | 83.049   | 82.065   | 118.086  | 117.102  | 72.081  | 173.092  | 147.113  | 130.086  | 16     | K   |
| 2      | I   | 185.165  | 168.138  | 167.154  | 213.160  | 196.133  | 195.149  | 231.170  | 230.186  | 86.096  | 286.176  | 260.197  | 243.170  | 15     | I   |
| 3      | L   | 238.249  | 281.222  | 280.238  | 326.244  | 309.217  | 308.233  | 344.254  | 343.270  | 86.096  | 399.260  | 373.281  | 356.254  | 14     | I   |
| 4      | P   | 395.302  | 378.275  | 377.291  | 423.297  | 406.270  | 405.286  | 441.307  | 440.323  | 70.065  | 528.303  | 502.324  | 485.297  | 13     | E   |
| 5      | D   | 510.329  | 493.302  | 492.318  | 538.324  | 521.297  | 520.313  | 556.334  | 555.350  | 88.039  | 641.367  | 615.408  | 598.381  | 12     | I   |
| 6      | V   | 609.397  | 592.370  | 591.386  | 637.392  | 620.365  | 619.381  | 655.403  | 654.418  | 72.081  | 755.430  | 729.451  | 712.424  | 11     | N   |
| 7      | P   | 706.450  | 689.423  | 688.439  | 734.445  | 717.418  | 716.434  | 752.455  | 751.471  | 70.065  | 826.467  | 800.488  | 783.461  | 10     | A   |
| 8      | H   | 843.509  | 826.482  | 825.498  | 871.504  | 854.477  | 853.493  | 889.514  | 888.530  | 110.071 | 996.498  | 960.518  | 943.492  | 9      | C*  |
| 9      | C*  | 1003.539 | 986.513  | 985.529  | 1031.534 | 1014.508 | 1013.524 | 1049.545 | 1048.561 | 133.043 | 1123.556 | 1097.577 | 1080.551 | 8      | H   |
| 10     | A   | 1074.576 | 1057.550 | 1056.566 | 1102.571 | 1085.545 | 1084.561 | 1120.582 | 1119.598 | 44.040  | 1220.609 | 1194.630 | 1177.603 | 7      | P   |
| 11     | N   | 1188.619 | 1171.593 | 1170.609 | 1216.614 | 1199.588 | 1198.604 | 1234.625 | 1233.641 | 87.055  | 1319.678 | 1293.698 | 1276.672 | 6      | V   |
| 12     | I   | 1301.703 | 1284.677 | 1283.693 | 1329.698 | 1312.672 | 1311.688 | 1347.709 | 1346.725 | 86.096  | 1434.705 | 1408.725 | 1391.699 | 5      | D   |
| 13     | E   | 1430.748 | 1413.719 | 1412.735 | 1458.741 | 1441.714 | 1440.730 | 1476.752 | 1475.768 | 102.055 | 1531.757 | 1505.778 | 1488.752 | 4      | P   |
| 14     | I   | 1543.830 | 1526.804 | 1525.820 | 1571.825 | 1554.798 | 1553.814 | 1589.836 | 1588.852 | 86.096  | 1644.841 | 1618.862 | 1601.836 | 3      | L   |
| 15     | I   | 1658.914 | 1639.888 | 1638.904 | 1684.909 | 1667.883 | 1666.899 | 1702.920 | 1701.936 | 86.096  | 1757.925 | 1731.946 | 1714.920 | 2      | I   |
| 16     | K   | 1785.009 | 1767.983 | 1766.999 | 1813.004 | 1796.978 | 1794.993 | 1831.015 | 1830.031 | 101.107 | 1886.994 | 1831.015 | 1813.988 | 1      | V   |

Copyright © 1999-2008 Bruker Daltonik GmbH

Area 5. Annotated MS/MS spectrum of ion 1512.781 m/z.

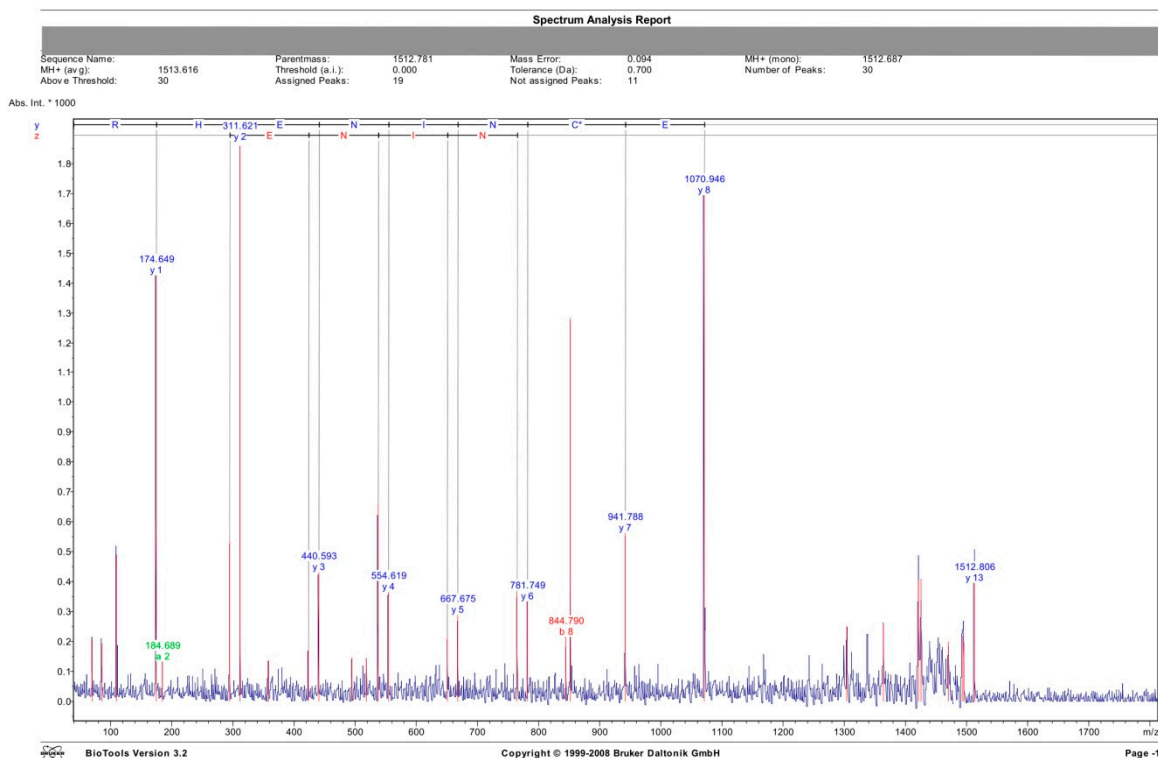

**Spectrum Analysis Report**

**Display Parameter:**

|                   |          |                     |       |                  |          |                  |          |
|-------------------|----------|---------------------|-------|------------------|----------|------------------|----------|
| Parentmass:       | 1512.781 | Mass Error:         | 0.094 | MH+ (mono):      | 1512.687 | MH+ (avg):       | 1513.616 |
| Threshold (a.i.): | 0.000    | Tolerance (Da):     | 0.700 | Number of Peaks: | 30       | Above Threshold: | 30       |
| Assigned Peaks:   | 19       | Not assigned Peaks: | 11    |                  |          |                  |          |

**Peaklist:**

| Peak | Mass     | Intensity | Peak | Mass     | Intensity | Peak | Mass     | Intensity | Peak | Mass     | Intensity | Peak | Mass     | Intensity |
|------|----------|-----------|------|----------|-----------|------|----------|-----------|------|----------|-----------|------|----------|-----------|
| 1    | 69.682   | 206.384   | 2    | 85.747   | 194.033   | 3    | 109.699  | 490.776   | 4    | 174.649  | 1426.767  | 5    | 184.689  | 132.349   |
| 6    | 294.810  | 535.696   | 7    | 311.621  | 1972.651  | 8    | 358.525  | 136.448   | 9    | 423.598  | 112.522   | 10   | 440.593  | 431.651   |
| 11   | 494.607  | 146.687   | 12   | 518.534  | 140.528   | 13   | 537.562  | 658.944   | 14   | 554.619  | 365.902   | 15   | 650.650  | 214.409   |
| 16   | 667.675  | 288.698   | 17   | 764.743  | 366.633   | 18   | 781.749  | 333.828   | 19   | 844.790  | 215.131   | 20   | 851.799  | 1284.091  |
| 21   | 941.788  | 562.711   | 22   | 1070.946 | 1694.398  | 23   | 1303.876 | 252.813   | 24   | 1364.220 | 258.583   | 25   | 1421.415 | 484.718   |
| 26   | 1425.493 | 408.885   | 27   | 1470.553 | 200.507   | 28   | 1493.692 | 221.755   | 29   | 1495.691 | 196.822   | 30   | 1512.806 | 395.537   |

**Calculated Masses:**  
VIGDGCNINEHR 7: Carbamidomethyl (C)

| N-Term | Ion | a        | a-17     | a-18     | b        | b-17     | b-18     | b+18     | c        | i       | x        | y        | z        | C-Term | Ion |
|--------|-----|----------|----------|----------|----------|----------|----------|----------|----------|---------|----------|----------|----------|--------|-----|
| 1      | V   | 72.081   | 55.054   | 54.070   | 100.076  | 83.049   | 82.065   | 118.086  | 117.102  | 72.081  | 201.098  | 175.119  | 158.092  | 13     | R   |
| 2      | I   | 185.165  | 168.138  | 167.154  | 213.160  | 196.133  | 195.149  | 231.170  | 230.186  | 86.096  | 338.157  | 312.178  | 295.151  | 12     | H   |
| 3      | G   | 242.186  | 225.160  | 224.176  | 270.181  | 253.155  | 252.171  | 288.192  | 287.208  | 30.034  | 487.200  | 441.220  | 424.194  | 11     | E   |
| 4      | G   | 299.208  | 282.181  | 281.197  | 327.203  | 310.176  | 309.192  | 345.213  | 344.229  | 30.034  | 581.243  | 555.263  | 538.237  | 10     | N   |
| 5      | D   | 414.235  | 397.208  | 396.224  | 442.230  | 425.203  | 424.219  | 460.240  | 459.256  | 88.039  | 694.327  | 668.347  | 651.321  | 9      | I   |
| 6      | E   | 543.277  | 526.251  | 525.267  | 571.272  | 554.246  | 553.262  | 589.283  | 588.299  | 102.055 | 898.370  | 872.390  | 855.364  | 8      | N   |
| 7      | C*  | 703.308  | 686.281  | 685.297  | 731.303  | 714.276  | 713.292  | 749.313  | 748.329  | 133.043 | 988.400  | 942.421  | 925.394  | 7      | C*  |
| 8      | N   | 817.351  | 800.324  | 799.340  | 845.346  | 828.319  | 827.335  | 863.356  | 862.372  | 87.055  | 1097.443 | 1071.464 | 1054.437 | 6      | E   |
| 9      | I   | 930.435  | 913.408  | 912.424  | 958.430  | 941.403  | 940.419  | 976.440  | 975.456  | 86.096  | 1212.470 | 1186.491 | 1169.464 | 5      | D   |
| 10     | N   | 1044.478 | 1027.451 | 1026.467 | 1072.473 | 1055.446 | 1054.462 | 1090.483 | 1089.499 | 87.055  | 1269.491 | 1243.512 | 1226.485 | 4      | G   |
| 11     | E   | 1173.520 | 1156.494 | 1155.510 | 1201.515 | 1184.489 | 1183.505 | 1219.526 | 1218.542 | 102.055 | 1326.513 | 1300.533 | 1283.507 | 3      | G   |
| 12     | H   | 1310.579 | 1293.553 | 1292.569 | 1338.574 | 1321.548 | 1320.564 | 1356.585 | 1355.601 | 110.071 | 1439.597 | 1413.618 | 1396.591 | 2      | I   |
| 13     | R   | 1466.680 | 1449.654 | 1448.670 | 1494.675 | 1477.649 | 1476.665 | 1512.686 | 1511.702 | 129.113 | 1538.665 | 1512.686 | 1495.659 | 1      | V   |

BioTools Version 3.2 Copyright © 1999-2008 Bruker Daltonik GmbH Page -2-



Area 5. Annotated MS/MS spectrum of ion 888.452 m/z.

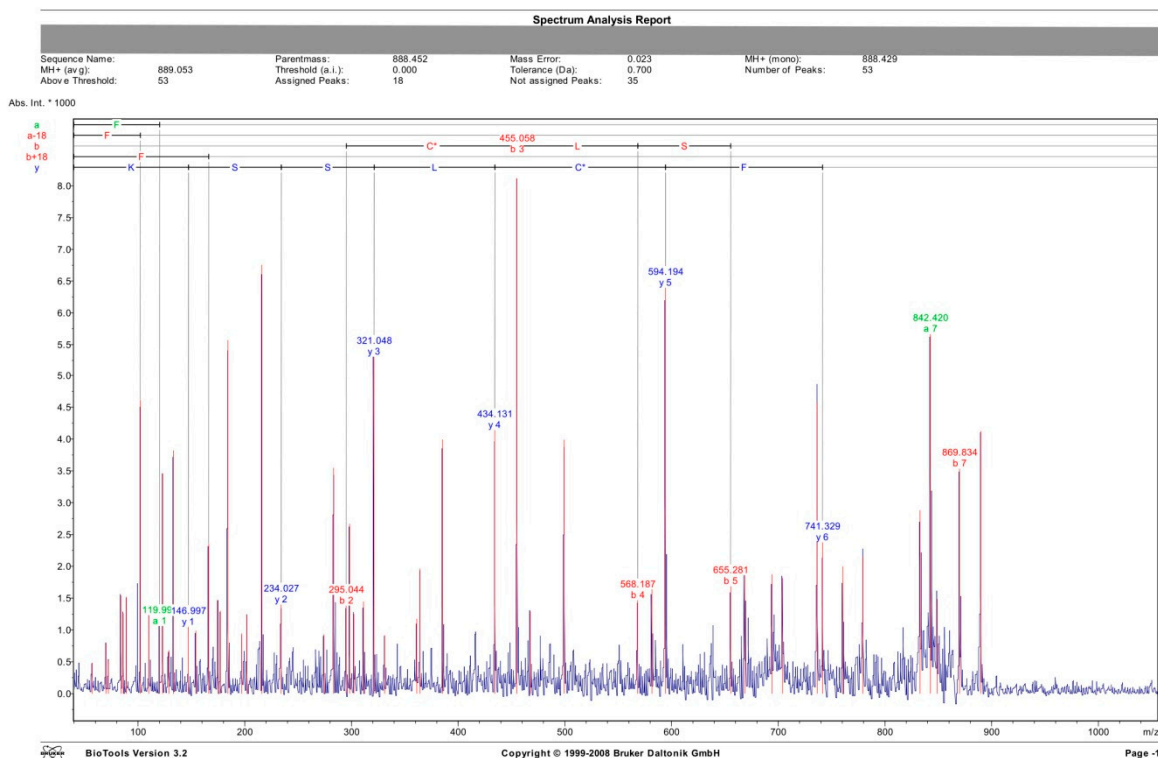

**Spectrum Analysis Report**

Display Parameter: Parentmass: 888.452 Mass Error: 0.023 MH+ (mono): 888.429 MH+ (avg): 889.053  
 Threshold (a.i.): 0.000 Tolerance (Da): 0.700 Number of Peaks: 53 Above Threshold: 53  
 Assigned Peaks: 18 Not assigned Peaks: 35

**Peaklist:**

| Peak | Mass    | Intensity | Peak | Mass    | Intensity | Peak | Mass    | Intensity | Peak | Mass    | Intensity | Peak | Mass    | Intensity |
|------|---------|-----------|------|---------|-----------|------|---------|-----------|------|---------|-----------|------|---------|-----------|
| 1    | 56.902  | 486.413   | 2    | 69.942  | 795.242   | 3    | 71.986  | 526.068   | 4    | 83.972  | 1544.545  | 5    | 86.009  | 1261.505  |
| 6    | 88.965  | 325.353   | 7    | 102.000 | 4615.877  | 8    | 109.973 | 1269.961  | 9    | 119.993 | 1061.291  | 10   | 123.020 | 3459.474  |
| 11   | 129.000 | 683.436   | 12   | 132.973 | 3822.179  | 13   | 146.997 | 1048.126  | 14   | 153.984 | 990.236   | 15   | 166.055 | 2349.984  |
| 16   | 175.014 | 1473.619  | 17   | 177.026 | 1303.520  | 18   | 184.083 | 5571.883  | 19   | 197.007 | 948.157   | 20   | 202.025 | 1231.880  |
| 21   | 218.052 | 6768.664  | 22   | 234.027 | 1400.228  | 23   | 274.017 | 531.482   | 24   | 283.296 | 3548.925  | 25   | 295.044 | 1380.273  |
| 26   | 298.168 | 2668.943  | 27   | 302.138 | 1255.318  | 28   | 311.227 | 1448.461  | 29   | 321.048 | 5308.246  | 30   | 331.043 | 918.732   |
| 31   | 361.047 | 1179.058  | 32   | 364.046 | 1966.261  | 33   | 385.274 | 3995.934  | 34   | 434.131 | 4140.731  | 35   | 455.058 | 8495.811  |
| 36   | 497.361 | 1294.450  | 37   | 499.343 | 3391.767  | 38   | 568.187 | 1466.639  | 39   | 581.456 | 1861.112  | 40   | 594.194 | 6395.061  |
| 41   | 655.281 | 1687.851  | 42   | 668.454 | 1931.467  | 43   | 694.094 | 1876.648  | 44   | 704.033 | 1820.428  | 45   | 736.480 | 4577.611  |
| 46   | 741.329 | 2376.846  | 47   | 760.405 | 2000.854  | 48   | 779.201 | 2152.524  | 49   | 832.711 | 2882.154  | 50   | 842.420 | 5668.875  |
| 51   | 848.794 | 1467.540  | 52   | 869.834 | 3536.499  | 53   | 889.653 | 4127.877  |      |         |           |      |         |           |

**Calculated Masses:**  
 FFCLSSK 3: Carbamidomethyl I (C)

| N-Term | Ion | a       | a-17    | a-18    | b       | b-17    | b-18    | b+18    | c       | i       | x       | y       | z       | C-Term | Ion |
|--------|-----|---------|---------|---------|---------|---------|---------|---------|---------|---------|---------|---------|---------|--------|-----|
| 1      | F   | 120.081 | 103.054 | 102.070 | 148.076 | 131.049 | 130.065 | 166.086 | 165.102 | 120.081 | 173.092 | 147.113 | 130.086 | 7      | K   |
| 2      | F   | 267.149 | 250.123 | 249.139 | 295.144 | 278.118 | 277.134 | 313.155 | 312.171 | 120.081 | 260.124 | 234.145 | 217.118 | 6      | S   |
| 3      | C*  | 427.180 | 410.153 | 409.169 | 455.175 | 438.148 | 437.164 | 473.185 | 472.201 | 133.043 | 347.156 | 321.177 | 304.150 | 5      | S   |
| 4      | L   | 540.264 | 523.237 | 522.253 | 568.259 | 551.232 | 550.248 | 586.269 | 585.285 | 86.096  | 460.240 | 434.261 | 417.234 | 4      | L   |
| 5      | S   | 627.296 | 610.269 | 609.285 | 655.291 | 638.264 | 637.280 | 673.301 | 672.317 | 60.044  | 620.271 | 594.292 | 577.265 | 3      | C*  |
| 6      | S   | 714.328 | 697.301 | 696.317 | 742.323 | 725.296 | 724.312 | 760.333 | 759.349 | 60.044  | 767.339 | 741.360 | 724.333 | 2      | F   |
| 7      | K   | 842.423 | 825.396 | 824.412 | 870.418 | 853.391 | 852.407 | 888.428 | 887.444 | 101.107 | 914.408 | 888.428 | 871.402 | 1      | F   |

BioTools Version 3.2 Copyright © 1999-2008 Bruker Daltonik GmbH Page -2-

Area 5. Annotated MS/MS spectrum of ion 1189.656 m/z.

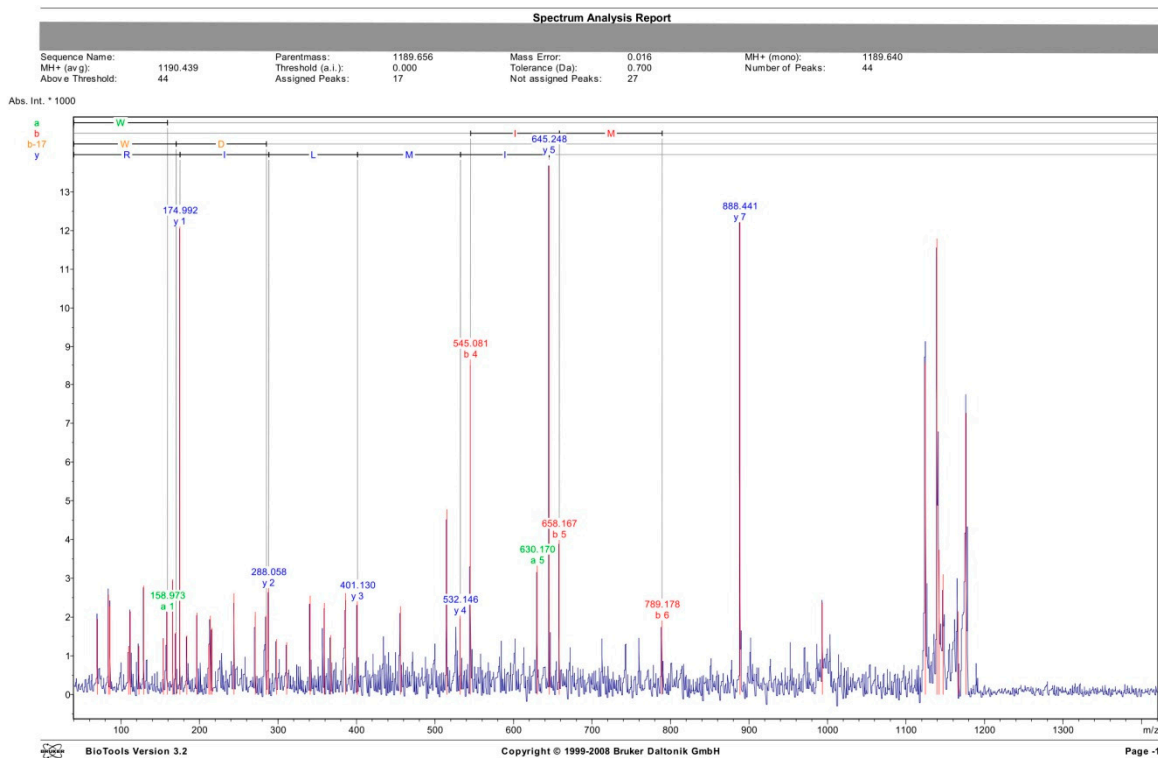

**Spectrum Analysis Report**

|                    |                   |          |                     |       |                  |          |                  |          |
|--------------------|-------------------|----------|---------------------|-------|------------------|----------|------------------|----------|
| Display Parameter: | Parentmass:       | 1189.656 | Mass Error:         | 0.018 | MH+ (mono):      | 1189.640 | MH+ (avg):       | 1190.439 |
|                    | Threshold (a.i.): | 0.000    | Tolerance (Da):     | 0.700 | Number of Peaks: | 44       | Above Threshold: | 44       |
|                    | Assigned Peaks:   | 17       | Not assigned Peaks: | 27    |                  |          |                  |          |

**Peaklist:**

| Peak | Mass     | Intensity | Peak | Mass     | Intensity | Peak | Mass     | Intensity | Peak | Mass     | Intensity | Peak | Mass     | Intensity |
|------|----------|-----------|------|----------|-----------|------|----------|-----------|------|----------|-----------|------|----------|-----------|
| 1    | 69.988   | 1951.459  | 2    | 83.975   | 2581.839  | 3    | 86.009   | 2275.108  | 4    | 109.939  | 1227.294  | 5    | 111.972  | 2149.867  |
| 6    | 122.999  | 1256.430  | 7    | 128.997  | 2913.319  | 8    | 153.982  | 1444.512  | 9    | 158.973  | 2136.322  | 10   | 166.011  | 2977.716  |
| 11   | 169.931  | 1621.322  | 12   | 174.992  | 12107.406 | 13   | 183.988  | 1531.105  | 14   | 198.992  | 2114.026  | 15   | 211.998  | 1302.597  |
| 16   | 213.998  | 2036.555  | 17   | 215.989  | 1723.260  | 18   | 243.996  | 2613.610  | 19   | 271.030  | 2135.326  | 20   | 285.019  | 2055.698  |
| 21   | 288.058  | 2748.332  | 22   | 298.051  | 1431.458  | 23   | 311.087  | 1352.428  | 24   | 341.019  | 2551.690  | 25   | 368.018  | 2369.847  |
| 26   | 367.077  | 1536.193  | 27   | 386.099  | 2618.908  | 28   | 401.130  | 2404.588  | 29   | 456.090  | 2280.326  | 30   | 515.140  | 4780.260  |
| 31   | 532.146  | 2035.626  | 32   | 545.081  | 8669.033  | 33   | 630.170  | 3330.533  | 34   | 645.248  | 13950.409 | 35   | 658.167  | 3993.054  |
| 36   | 789.178  | 1912.414  | 37   | 888.441  | 12218.851 | 38   | 993.368  | 2377.892  | 39   | 1124.561 | 8559.726  | 40   | 1139.183 | 11795.402 |
| 41   | 1142.121 | 3739.024  | 42   | 1147.181 | 3103.887  | 43   | 1166.125 | 2145.961  | 44   | 1176.590 | 7263.730  |      |          |           |

**Calculated Masses:**  
WDKDMLIR

| N-Term | Ion | a        | a-17     | a-18     | b        | b-17     | b-18     | b+18     | c        | i       | 199.092  | x        | y        | z | C-Term | Ion |
|--------|-----|----------|----------|----------|----------|----------|----------|----------|----------|---------|----------|----------|----------|---|--------|-----|
| 1      | W   | 159.092  | 142.065  | 141.081  | 167.087  | 170.060  | 169.078  | 205.097  | 204.113  | 199.092 | 201.098  | 175.119  | 158.092  | 9 | R      |     |
| 2      | D   | 274.119  | 287.092  | 296.108  | 302.114  | 285.087  | 284.103  | 320.124  | 319.140  | 88.039  | 314.162  | 288.203  | 271.176  | 8 | I      |     |
| 3      | K   | 402.214  | 385.187  | 384.203  | 430.208  | 413.182  | 412.198  | 448.219  | 447.235  | 101.107 | 427.256  | 401.287  | 384.261  | 7 | L      |     |
| 4      | D   | 517.241  | 500.214  | 499.230  | 545.235  | 528.209  | 527.225  | 563.246  | 562.262  | 88.039  | 558.307  | 532.328  | 515.301  | 6 | M      |     |
| 5      | I   | 630.325  | 613.298  | 612.314  | 658.320  | 641.293  | 640.309  | 676.330  | 675.345  | 86.096  | 671.391  | 645.412  | 628.385  | 5 | I      |     |
| 6      | M   | 761.365  | 744.339  | 743.355  | 789.360  | 772.333  | 771.349  | 807.371  | 806.387  | 104.053 | 788.418  | 760.439  | 743.412  | 4 | D      |     |
| 7      | L   | 874.449  | 857.423  | 856.439  | 902.444  | 885.418  | 884.433  | 920.455  | 919.471  | 86.096  | 914.513  | 888.534  | 871.507  | 3 | K      |     |
| 8      | I   | 987.533  | 970.507  | 969.523  | 1015.528 | 998.502  | 997.518  | 1033.539 | 1032.555 | 86.096  | 1029.540 | 1003.560 | 986.534  | 2 | D      |     |
| 9      | K   | 1143.634 | 1126.608 | 1125.624 | 1171.629 | 1154.603 | 1153.619 | 1189.640 | 1188.656 | 129.113 | 1215.619 | 1189.640 | 1172.613 | 1 | W      |     |

BioTools Version 3.2 Copyright © 1999-2008 Bruker Daltonik GmbH Page -2-

Area 5. Annotated MS/MS spectrum of ion 1208.642 m/z.

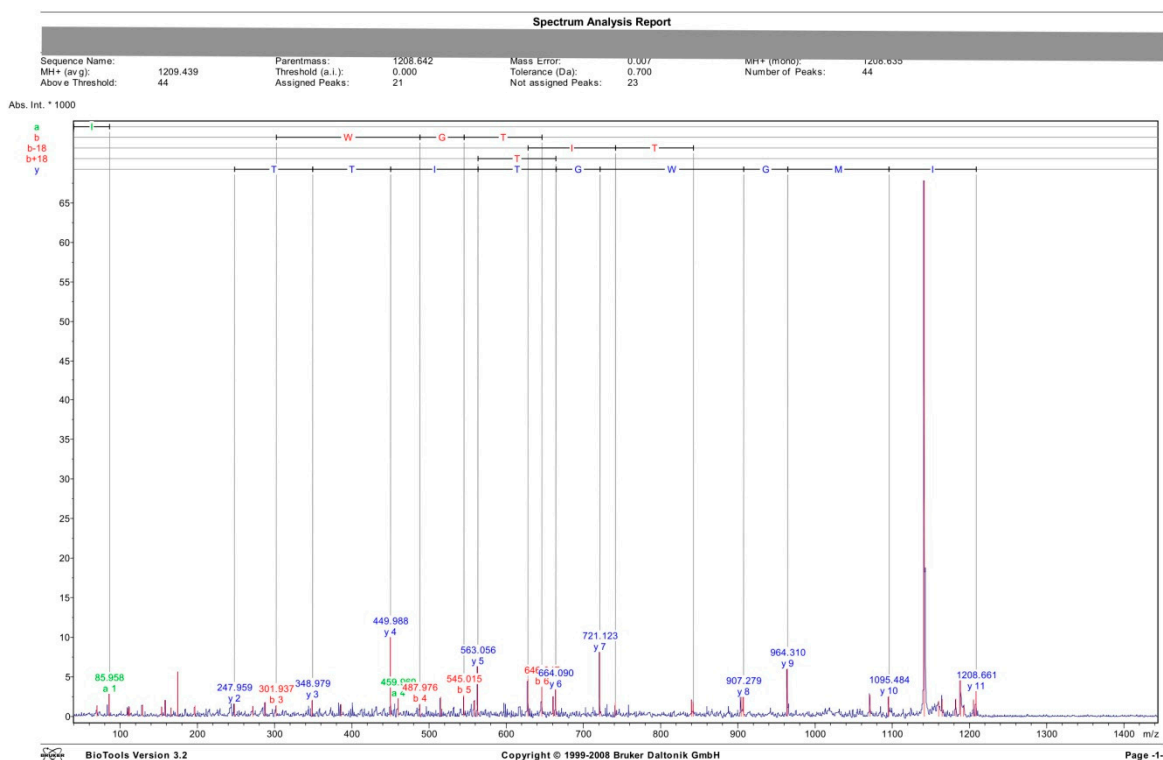

**Spectrum Analysis Report**

**Display Parameter:**

|                   |          |                     |       |                  |          |                  |          |
|-------------------|----------|---------------------|-------|------------------|----------|------------------|----------|
| Parentmass:       | 1208.642 | Mass Error:         | 0.007 | MH+ (mono):      | 1208.635 | MH+ (avg):       | 1209.439 |
| Threshold (a.i.): | 0.000    | Tolerance (Da):     | 0.700 | Number of Peaks: | 44       | Above Threshold: | 44       |
| Assigned Peaks:   | 21       | Not assigned Peaks: | 23    |                  |          |                  |          |

**Peaklist:**

| Peak | Mass     | Intensity | Peak | Mass     | Intensity | Peak | Mass     | Intensity | Peak | Mass     | Intensity | Peak | Mass     | Intensity |
|------|----------|-----------|------|----------|-----------|------|----------|-----------|------|----------|-----------|------|----------|-----------|
| 1    | 69.939   | 1316.609  | 2    | 85.958   | 2855.790  | 3    | 109.899  | 1052.899  | 4    | 111.923  | 1210.909  | 5    | 128.942  | 1475.463  |
| 6    | 153.922  | 1205.242  | 7    | 158.929  | 2085.436  | 8    | 165.920  | 1144.857  | 9    | 174.930  | 5682.127  | 10   | 196.926  | 1382.436  |
| 11   | 247.959  | 1617.452  | 12   | 271.949  | 1329.827  | 13   | 287.966  | 1853.963  | 14   | 301.937  | 1448.276  | 15   | 348.979  | 2118.559  |
| 16   | 386.012  | 1974.154  | 17   | 449.988  | 10023.731 | 18   | 459.969  | 2304.335  | 19   | 487.976  | 1613.690  | 20   | 514.987  | 2503.822  |
| 21   | 545.015  | 2712.625  | 22   | 559.011  | 2089.724  | 23   | 563.056  | 6343.080  | 24   | 628.031  | 4711.806  | 25   | 646.047  | 3759.679  |
| 26   | 661.148  | 2584.398  | 27   | 664.090  | 3454.761  | 28   | 721.123  | 8140.831  | 29   | 741.100  | 1749.907  | 30   | 840.291  | 2163.035  |
| 31   | 842.167  | 1881.462  | 32   | 904.269  | 2606.545  | 33   | 907.279  | 2469.624  | 34   | 964.310  | 6035.407  | 35   | 1071.298 | 2751.792  |
| 36   | 1095.484 | 2585.529  | 37   | 1141.387 | 68295.724 | 38   | 1160.236 | 1999.814  | 39   | 1164.598 | 2224.776  | 40   | 1182.292 | 2274.138  |
| 41   | 1188.286 | 5800.729  | 42   | 1192.227 | 1383.739  | 43   | 1205.334 | 2192.811  | 44   | 1208.661 | 3180.918  |      |          |           |

**Calculated Masses:**

IMGWGTTTTK

| N-Term | Ion | a              | a-17     | a-18     | b              | b-17     | b-18           | b+18            | c        | i              | x        | y               | z               | C-Term | Ion |
|--------|-----|----------------|----------|----------|----------------|----------|----------------|-----------------|----------|----------------|----------|-----------------|-----------------|--------|-----|
| 1      | I   | <b>86.096</b>  | 69.070   | 68.086   | 114.091        | 97.065   | 96.081         | 132.102         | 131.118  | <b>86.096</b>  | 173.092  | 147.113         | 130.086         | 11     | K   |
| 2      | M   | 217.137        | 200.110  | 199.126  | 245.132        | 228.105  | 227.121        | 263.142         | 262.158  | 104.053        | 274.140  | <b>248.160</b>  | 231.134         | 10     | T   |
| 3      | G   | 274.158        | 257.132  | 256.148  | <b>302.153</b> | 285.127  | 284.143        | 320.164         | 319.180  | 30.034         | 378.187  | <b>349.200</b>  | 332.182         | 9      | T   |
| 4      | W   | <b>460.238</b> | 443.211  | 442.227  | <b>488.233</b> | 471.206  | 470.222        | 506.243         | 505.259  | <b>199.092</b> | 476.235  | <b>450.256</b>  | 433.229         | 8      | Y   |
| 5      | G   | 517.259        | 500.233  | 499.249  | <b>545.254</b> | 528.228  | 527.243        | <b>563.265</b>  | 562.281  | 30.034         | 589.319  | <b>563.340</b>  | 546.313         | 7      | I   |
| 6      | T   | 618.307        | 601.280  | 600.296  | <b>646.302</b> | 629.275  | <b>628.291</b> | <b>664.312</b>  | 663.328  | 74.060         | 690.367  | <b>664.388</b>  | 647.361         | 6      | T   |
| 7      | I   | 731.391        | 714.364  | 713.380  | 759.386        | 742.359  | <b>741.375</b> | 777.396         | 776.412  | <b>86.096</b>  | 747.388  | <b>721.409</b>  | 704.382         | 5      | G   |
| 8      | T   | 832.439        | 815.412  | 814.428  | 860.433        | 843.407  | <b>842.423</b> | 878.444         | 877.460  | 74.060         | 933.468  | <b>907.488</b>  | 890.462         | 4      | W   |
| 9      | T   | 933.486        | 916.460  | 915.476  | 961.481        | 944.455  | 943.471        | 979.492         | 978.508  | 74.060         | 990.499  | <b>964.510</b>  | 947.483         | 3      | G   |
| 10     | T   | 1034.534       | 1017.507 | 1016.523 | 1062.529       | 1045.502 | 1044.518       | 1080.539        | 1079.555 | 74.060         | 1121.530 | <b>1095.550</b> | 1078.524        | 2      | M   |
| 11     | K   | 1162.629       | 1145.602 | 1144.618 | 1190.624       | 1173.597 | 1172.613       | <b>1208.634</b> | 1207.650 | 101.107        | 1234.614 | <b>1208.634</b> | <b>1191.608</b> | 1      | I   |

BioTools Version 3.2 Copyright © 1999-2008 Bruker Daltonik GmbH Page -2-

Area 5. Annotated MS/MS spectrum of ion 1498.790 m/z.

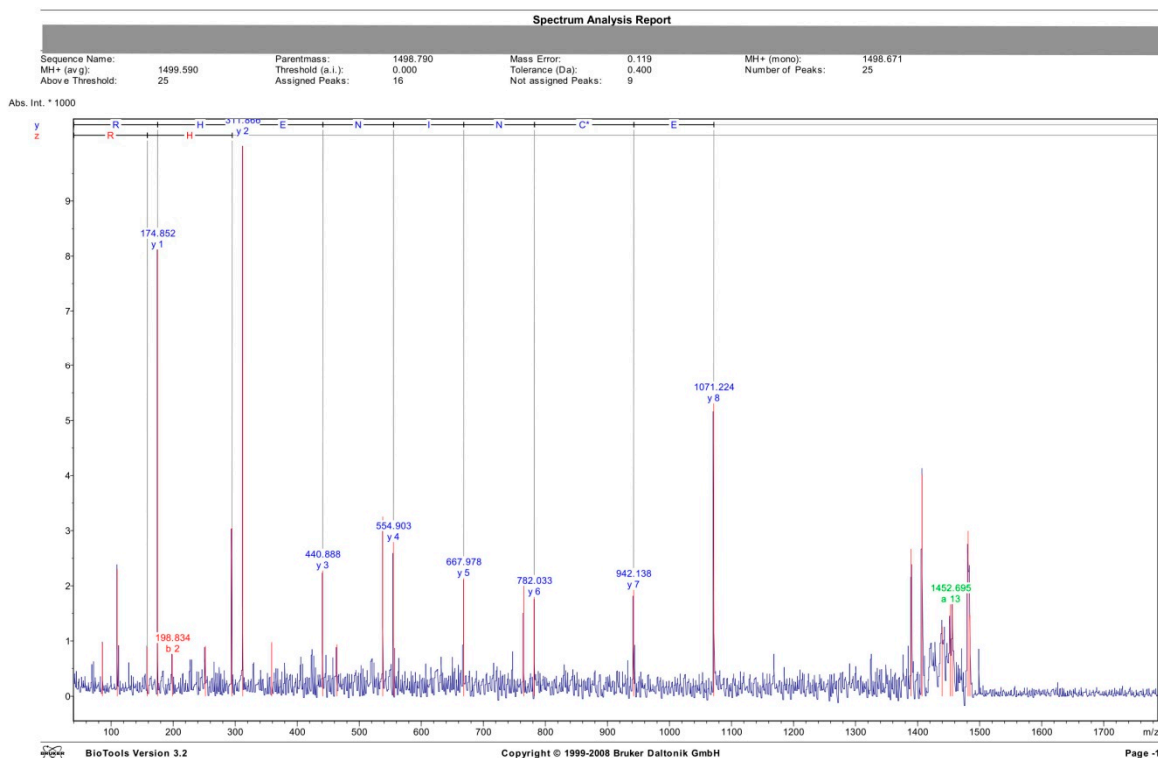

**Spectrum Analysis Report**

**Display Parameter:**

|                   |          |                     |       |                  |          |                  |          |
|-------------------|----------|---------------------|-------|------------------|----------|------------------|----------|
| Parentmass:       | 1498.790 | Mass Error:         | 0.119 | MH+ (mono):      | 1498.671 | MH+ (avg):       | 1499.590 |
| Threshold (a.i.): | 0.000    | Tolerance (Da):     | 0.400 | Number of Peaks: | 25       | Above Threshold: | 25       |
| Assigned Peaks:   | 16       | Not assigned Peaks: | 9     |                  |          |                  |          |

**Peaklist:**

| Peak | Mass     | Intensity | Peak | Mass     | Intensity | Peak | Mass     | Intensity | Peak | Mass     | Intensity | Peak | Mass     | Intensity |
|------|----------|-----------|------|----------|-----------|------|----------|-----------|------|----------|-----------|------|----------|-----------|
| 1    | 85.886   | 865.286   | 2    | 109.840  | 2304.396  | 3    | 157.837  | 889.073   | 4    | 174.852  | 8119.756  | 5    | 196.834  | 763.869   |
| 6    | 251.835  | 911.903   | 7    | 294.851  | 3065.086  | 8    | 311.866  | 10175.752 | 9    | 358.812  | 686.094   | 10   | 440.888  | 2278.247  |
| 11   | 463.914  | 942.031   | 12   | 537.869  | 3256.406  | 13   | 554.903  | 2794.946  | 14   | 667.978  | 2140.914  | 15   | 764.989  | 2011.967  |
| 16   | 782.033  | 1800.155  | 17   | 942.138  | 1928.426  | 18   | 1071.224 | 5308.886  | 19   | 1389.488 | 2674.597  | 20   | 1407.110 | 4024.491  |
| 21   | 1439.812 | 1259.628  | 22   | 1452.695 | 1967.502  | 23   | 1455.973 | 1774.842  | 24   | 1481.239 | 2988.493  | 25   | 1484.227 | 1471.720  |

**Calculated Masses:**  
VVGDECNINEHR 7: Carbamidomethyl (C)

| N-Term | Ion | a        | a-17     | a-18     | b        | b-17     | b-18     | b+18     | c        | i       | x        | y        | z        | C-Term | Ion |
|--------|-----|----------|----------|----------|----------|----------|----------|----------|----------|---------|----------|----------|----------|--------|-----|
| 1      | V   | 72.081   | 55.054   | 54.070   | 100.076  | 83.049   | 82.065   | 118.086  | 117.102  | 72.081  | 201.098  | 175.119  | 158.092  | 13     | R   |
| 2      | V   | 171.149  | 154.123  | 153.139  | 199.144  | 182.118  | 181.134  | 217.155  | 216.171  | 72.081  | 338.157  | 312.178  | 295.151  | 12     | H   |
| 3      | G   | 228.171  | 211.144  | 210.160  | 256.166  | 239.139  | 238.155  | 274.176  | 273.192  | 30.034  | 467.200  | 441.220  | 424.194  | 11     | E   |
| 4      | G   | 285.192  | 268.166  | 267.182  | 313.187  | 296.160  | 295.176  | 331.198  | 330.214  | 30.034  | 551.243  | 555.263  | 538.237  | 10     | N   |
| 5      | D   | 400.219  | 383.193  | 382.208  | 428.214  | 411.187  | 410.203  | 446.225  | 445.241  | 88.039  | 694.327  | 668.347  | 651.321  | 9      | I   |
| 6      | E   | 529.262  | 512.235  | 511.251  | 557.257  | 540.230  | 539.246  | 575.267  | 574.283  | 102.055 | 808.370  | 782.390  | 765.364  | 8      | N   |
| 7      | C*  | 689.292  | 672.266  | 671.282  | 717.287  | 700.261  | 699.277  | 735.298  | 734.314  | 133.043 | 968.400  | 942.421  | 925.394  | 7      | C*  |
| 8      | N   | 803.335  | 786.309  | 785.325  | 831.330  | 814.304  | 813.320  | 849.341  | 848.357  | 87.055  | 1097.443 | 1071.464 | 1054.437 | 6      | E   |
| 9      | I   | 916.419  | 899.393  | 898.409  | 944.414  | 927.388  | 926.404  | 962.425  | 961.441  | 86.096  | 1212.470 | 1186.491 | 1169.464 | 5      | D   |
| 10     | N   | 1030.462 | 1013.436 | 1012.452 | 1058.457 | 1041.431 | 1040.447 | 1076.468 | 1075.484 | 87.055  | 1289.491 | 1263.512 | 1246.485 | 4      | G   |
| 11     | E   | 1159.505 | 1142.479 | 1141.494 | 1187.500 | 1170.473 | 1169.489 | 1205.510 | 1204.526 | 102.055 | 1326.513 | 1300.533 | 1283.507 | 3      | G   |
| 12     | H   | 1296.564 | 1279.537 | 1278.553 | 1324.559 | 1307.532 | 1306.548 | 1342.569 | 1341.585 | 110.071 | 1425.581 | 1399.602 | 1382.575 | 2      | V   |
| 13     | R   | 1452.665 | 1435.638 | 1434.654 | 1480.660 | 1463.633 | 1462.649 | 1498.670 | 1497.686 | 129.113 | 1524.650 | 1498.670 | 1481.644 | 1      | V   |

BioTools Version 3.2 Copyright © 1999-2008 Bruker Daltonik GmbH Page -2-

Area 5. Annotated MS/MS spectrum of ion 1592.776 m/z.

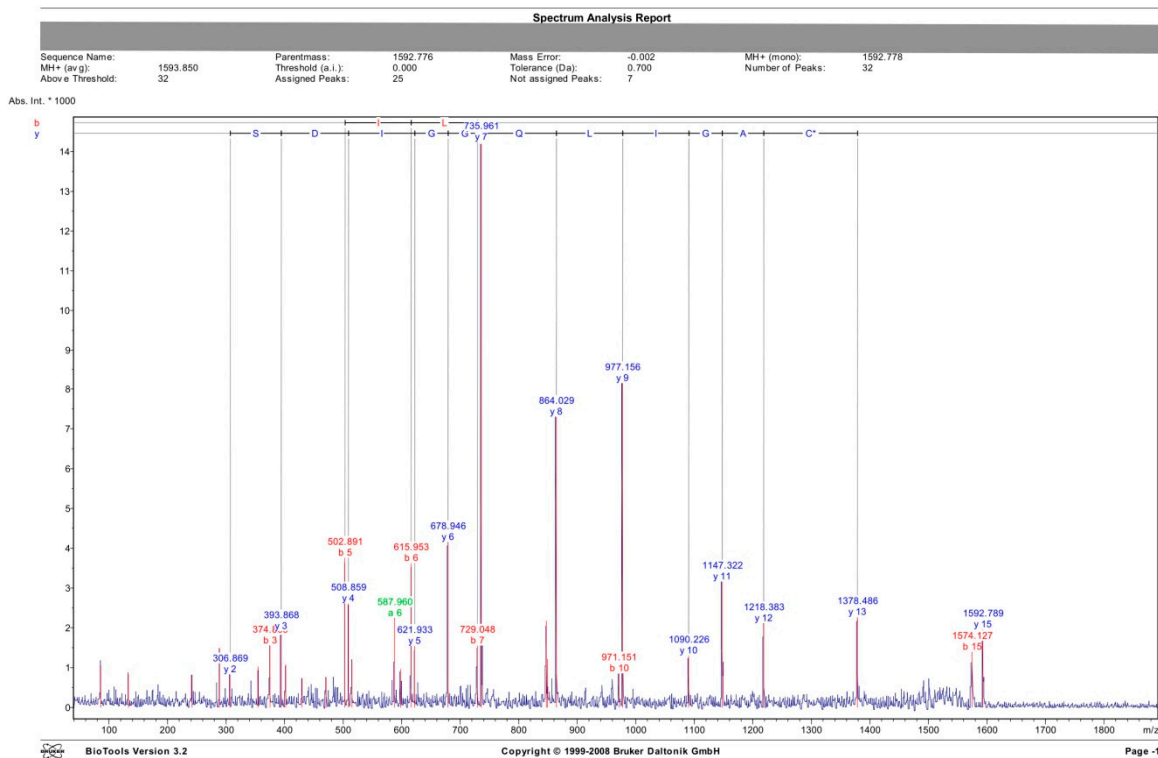

**Spectrum Analysis Report**

**Display Parameter:**

|                   |          |                     |        |                  |          |                  |          |
|-------------------|----------|---------------------|--------|------------------|----------|------------------|----------|
| Parentmass:       | 1592.776 | Mass Error:         | -0.002 | MH+ (mono):      | 1592.776 | MH+ (avg):       | 1593.850 |
| Threshold (a.i.): | 0.000    | Tolerance (Da):     | 0.700  | Number of Peaks: | 32       | Above Threshold: | 32       |
| Assigned Peaks:   | 25       | Not assigned Peaks: | 7      |                  |          |                  |          |

**Peaklist:**

| Peak | Mass     | Intensity | Peak | Mass     | Intensity | Peak | Mass     | Intensity | Peak | Mass     | Intensity | Peak | Mass     | Intensity |
|------|----------|-----------|------|----------|-----------|------|----------|-----------|------|----------|-----------|------|----------|-----------|
| 1    | 85.905   | 1063.412  | 2    | 132.847  | 830.626   | 3    | 241.891  | 617.863   | 4    | 288.827  | 1496.918  | 5    | 306.869  | 629.366   |
| 6    | 354.904  | 1029.565  | 7    | 374.863  | 1551.329  | 8    | 393.868  | 1915.657  | 9    | 401.873  | 1086.438  | 10   | 429.880  | 743.303   |
| 11   | 470.889  | 757.054   | 12   | 502.891  | 3759.363  | 13   | 508.859  | 2611.117  | 14   | 514.891  | 1165.983  | 15   | 587.960  | 2245.748  |
| 16   | 597.986  | 869.469   | 17   | 615.953  | 3623.859  | 18   | 621.933  | 1545.009  | 19   | 678.946  | 4151.695  | 20   | 729.048  | 1564.907  |
| 21   | 735.961  | 14240.065 | 22   | 847.039  | 2181.152  | 23   | 848.966  | 1222.166  | 24   | 864.029  | 7304.431  | 25   | 971.151  | 855.766   |
| 26   | 977.156  | 8147.261  | 27   | 1090.226 | 1301.177  | 28   | 1147.322 | 3160.719  | 29   | 1218.383 | 2116.883  | 30   | 1378.486 | 2272.304  |
| 31   | 1574.127 | 1396.536  | 32   | 1592.789 | 1961.810  |      |          |           |      |          |           |      |          |           |

**Calculated Masses:**  
 TLAGILGGIDSK 3: Carbamidomethyl (C) 14: Carbamidomethyl (C)

| N-Term. | Ion | a        | a-17     | a-18     | b        | b-17     | b-18     | b+18     | c        | l       | x        | y        | z        | C-Term. | Ion |
|---------|-----|----------|----------|----------|----------|----------|----------|----------|----------|---------|----------|----------|----------|---------|-----|
| 1       | T   | 74.060   | 57.033   | 56.049   | 102.055  | 85.028   | 84.044   | 120.066  | 119.082  | 74.060  | 173.092  | 147.113  | 130.086  | 15      | K   |
| 2       | L   | 187.144  | 170.118  | 169.134  | 215.139  | 198.112  | 197.128  | 233.150  | 232.166  | 86.096  | 333.123  | 387.143  | 290.117  | 14      | C*  |
| 3       | C*  | 347.175  | 330.148  | 329.164  | 375.170  | 358.143  | 357.159  | 393.180  | 392.196  | 133.043 | 420.155  | 394.175  | 377.149  | 13      | S   |
| 4       | A   | 418.212  | 401.185  | 400.201  | 446.207  | 429.180  | 428.196  | 464.217  | 463.233  | 44.049  | 535.182  | 509.202  | 492.176  | 12      | D   |
| 5       | G   | 475.233  | 458.207  | 457.223  | 503.228  | 486.202  | 485.218  | 521.239  | 520.255  | 30.034  | 648.266  | 622.246  | 605.260  | 11      | I   |
| 6       | I   | 588.317  | 571.291  | 570.307  | 616.312  | 599.286  | 598.302  | 634.323  | 633.339  | 86.096  | 705.287  | 679.308  | 662.281  | 10      | G   |
| 7       | L   | 701.401  | 684.375  | 683.391  | 729.396  | 712.370  | 711.386  | 747.407  | 746.423  | 86.096  | 762.309  | 736.329  | 719.303  | 9       | G   |
| 8       | Q   | 829.460  | 812.433  | 811.449  | 857.455  | 840.428  | 839.444  | 875.466  | 874.481  | 101.071 | 890.387  | 864.368  | 847.361  | 8       | Q   |
| 9       | G   | 886.481  | 869.455  | 868.471  | 914.476  | 897.450  | 896.466  | 932.487  | 931.503  | 30.034  | 1003.451 | 977.472  | 960.446  | 7       | L   |
| 10      | G   | 943.503  | 926.476  | 925.492  | 971.498  | 954.471  | 953.487  | 989.508  | 988.524  | 30.034  | 1116.535 | 1090.556 | 1073.530 | 6       | I   |
| 11      | I   | 1056.587 | 1039.560 | 1038.576 | 1084.582 | 1067.555 | 1066.571 | 1102.593 | 1101.608 | 86.096  | 1173.557 | 1147.576 | 1130.551 | 5       | G   |
| 12      | D   | 1171.614 | 1154.587 | 1153.603 | 1199.609 | 1182.582 | 1181.598 | 1217.619 | 1216.635 | 88.039  | 1244.594 | 1218.615 | 1201.588 | 4       | A   |
| 13      | S   | 1258.646 | 1241.619 | 1240.635 | 1286.641 | 1269.614 | 1268.630 | 1304.651 | 1303.667 | 80.044  | 1404.625 | 1378.645 | 1361.619 | 3       | C*  |
| 14      | C*  | 1418.677 | 1401.650 | 1400.666 | 1446.672 | 1429.645 | 1428.661 | 1464.682 | 1463.698 | 133.043 | 1517.709 | 1491.729 | 1474.703 | 2       | L   |
| 15      | K   | 1546.772 | 1529.745 | 1528.761 | 1574.767 | 1557.740 | 1556.756 | 1592.777 | 1591.793 | 101.107 | 1618.756 | 1592.777 | 1575.751 | 1       | T   |

BioTools Version 3.2 Copyright © 1999-2008 Bruker Daltonik GmbH Page -2-

Area 6. Annotated MS/MS spectrum of ion 1537.689 m/z.

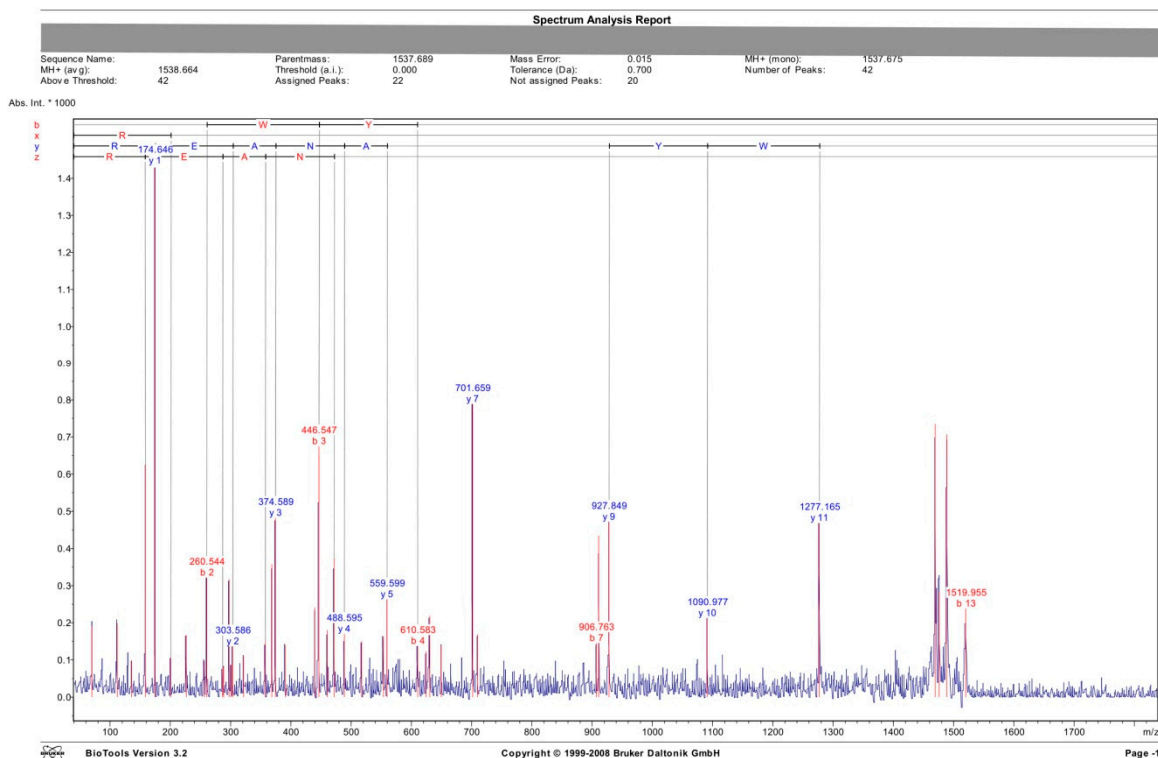

**Spectrum Analysis Report**

**Display Parameter:**

|                   |          |                     |       |                  |          |                  |          |
|-------------------|----------|---------------------|-------|------------------|----------|------------------|----------|
| Parentmass:       | 1537.689 | Mass Error:         | 0.015 | MH+ (mono):      | 1537.675 | MH+ (avg):       | 1538.664 |
| Threshold (a.i.): | 0.000    | Tolerance (Da):     | 0.700 | Number of Peaks: | 42       | Above Threshold: | 42       |
| Assigned Peaks:   | 22       | Not assigned Peaks: | 20    |                  |          |                  |          |

**Peaklist:**

| Peak | Mass     | Intensity | Peak | Mass     | Intensity | Peak | Mass     | Intensity | Peak | Mass     | Intensity | Peak | Mass     | Intensity |
|------|----------|-----------|------|----------|-----------|------|----------|-----------|------|----------|-----------|------|----------|-----------|
| 1    | 69.736   | 191.706   | 2    | 111.712  | 199.027   | 3    | 135.665  | 98.715    | 4    | 156.634  | 624.835   | 5    | 174.646  | 1434.016  |
| 6    | 200.552  | 108.650   | 7    | 226.596  | 166.861   | 8    | 256.613  | 97.210    | 9    | 260.544  | 321.451   | 10   | 286.561  | 79.806    |
| 11   | 288.547  | 80.255    | 12   | 297.570  | 317.376   | 13   | 300.565  | 86.750    | 14   | 303.586  | 136.642   | 15   | 321.596  | 110.425   |
| 16   | 357.551  | 150.069   | 17   | 368.564  | 357.901   | 18   | 374.589  | 481.942   | 19   | 390.577  | 140.414   | 20   | 439.563  | 241.021   |
| 21   | 446.547  | 874.708   | 22   | 460.571  | 181.064   | 23   | 471.583  | 373.817   | 24   | 488.595  | 169.567   | 25   | 517.540  | 150.616   |
| 26   | 553.548  | 163.703   | 27   | 559.599  | 282.805   | 28   | 610.583  | 137.552   | 29   | 624.608  | 123.420   | 30   | 630.607  | 218.757   |
| 31   | 649.632  | 136.638   | 32   | 701.659  | 788.346   | 33   | 709.640  | 168.762   | 34   | 906.763  | 145.267   | 35   | 910.778  | 434.375   |
| 36   | 927.849  | 471.358   | 37   | 1090.977 | 212.267   | 38   | 1277.165 | 468.729   | 39   | 1469.146 | 734.927   | 40   | 1475.690 | 286.271   |
| 41   | 1488.484 | 707.030   | 42   | 1519.955 | 237.926   |      |          |           |      |          |           |      |          |           |

**Calculated Masses:**  
MEWYPEAANAER

| N-Term | Ion | a        | a-17     | a-18     | b               | b-17     | b-18     | b+18     | c        | i              | x              | y               | z               | C-Term | Ion |
|--------|-----|----------|----------|----------|-----------------|----------|----------|----------|----------|----------------|----------------|-----------------|-----------------|--------|-----|
| 1      | M   | 104.053  | 87.026   | 86.042   | 132.048         | 115.021  | 114.037  | 150.058  | 149.074  | 104.053        | <b>201.098</b> | <b>175.119</b>  | <b>158.092</b>  | 13     | R   |
| 2      | E   | 233.095  | 216.069  | 215.085  | <b>261.090</b>  | 244.064  | 243.080  | 279.101  | 278.117  | 102.055        | 330.141        | <b>304.162</b>  | <b>287.135</b>  | 12     | E   |
| 3      | W   | 419.175  | 402.148  | 401.164  | <b>447.170</b>  | 430.143  | 429.159  | 465.180  | 464.196  | <b>159.092</b> | 401.178        | <b>375.199</b>  | <b>358.172</b>  | 11     | A   |
| 4      | Y   | 582.238  | 565.212  | 564.228  | <b>610.233</b>  | 593.206  | 592.222  | 628.244  | 627.260  | <b>136.076</b> | 515.221        | <b>489.242</b>  | <b>472.215</b>  | 10     | N   |
| 5      | P   | 679.291  | 662.264  | 661.280  | 707.286         | 690.259  | 689.275  | 725.296  | 724.312  | <b>70.065</b>  | 586.258        | <b>560.279</b>  | 543.252         | 9      | A   |
| 6      | E   | 898.333  | 791.307  | 790.323  | 836.328         | 819.302  | 818.318  | 854.339  | 853.355  | 102.055        | 657.295        | 631.316         | 614.299         | 8      | A   |
| 7      | A   | 879.371  | 862.344  | 861.360  | <b>907.365</b>  | 890.339  | 889.355  | 925.376  | 924.392  | 44.049         | 728.332        | <b>702.353</b>  | 685.326         | 7      | A   |
| 8      | A   | 950.408  | 933.381  | 932.397  | 978.403         | 961.376  | 960.392  | 996.413  | 995.429  | 44.049         | 857.375        | 831.396         | 814.369         | 6      | E   |
| 9      | A   | 1021.445 | 1004.418 | 1003.434 | 1049.440        | 1032.413 | 1031.429 | 1067.450 | 1066.466 | 44.049         | 954.428        | <b>928.448</b>  | <b>911.422</b>  | 5      | P   |
| 10     | N   | 1135.488 | 1118.461 | 1117.477 | 1163.483        | 1146.456 | 1145.472 | 1181.493 | 1180.509 | 87.055         | 1117.491       | <b>1091.512</b> | 1074.485        | 4      | Y   |
| 11     | A   | 1206.525 | 1189.498 | 1188.514 | 1234.520        | 1217.493 | 1216.509 | 1252.530 | 1251.546 | 44.049         | 1303.570       | <b>1277.591</b> | 1260.564        | 3      | W   |
| 12     | E   | 1335.567 | 1318.541 | 1317.557 | 1363.562        | 1346.536 | 1345.552 | 1381.573 | 1380.589 | 102.055        | 1432.613       | 1406.634        | 1389.607        | 2      | E   |
| 13     | R   | 1491.609 | 1474.642 | 1473.658 | <b>1519.663</b> | 1502.637 | 1501.653 | 1537.674 | 1536.690 | 129.113        | 1563.653       | 1537.674        | <b>1520.647</b> | 1      | M   |

BioTools Version 3.2 Copyright © 1999-2008 Bruker Daltonik GmbH Page -2-



### Area 6. Annotated MS/MS spectrum of ion 1919.083 m/z.

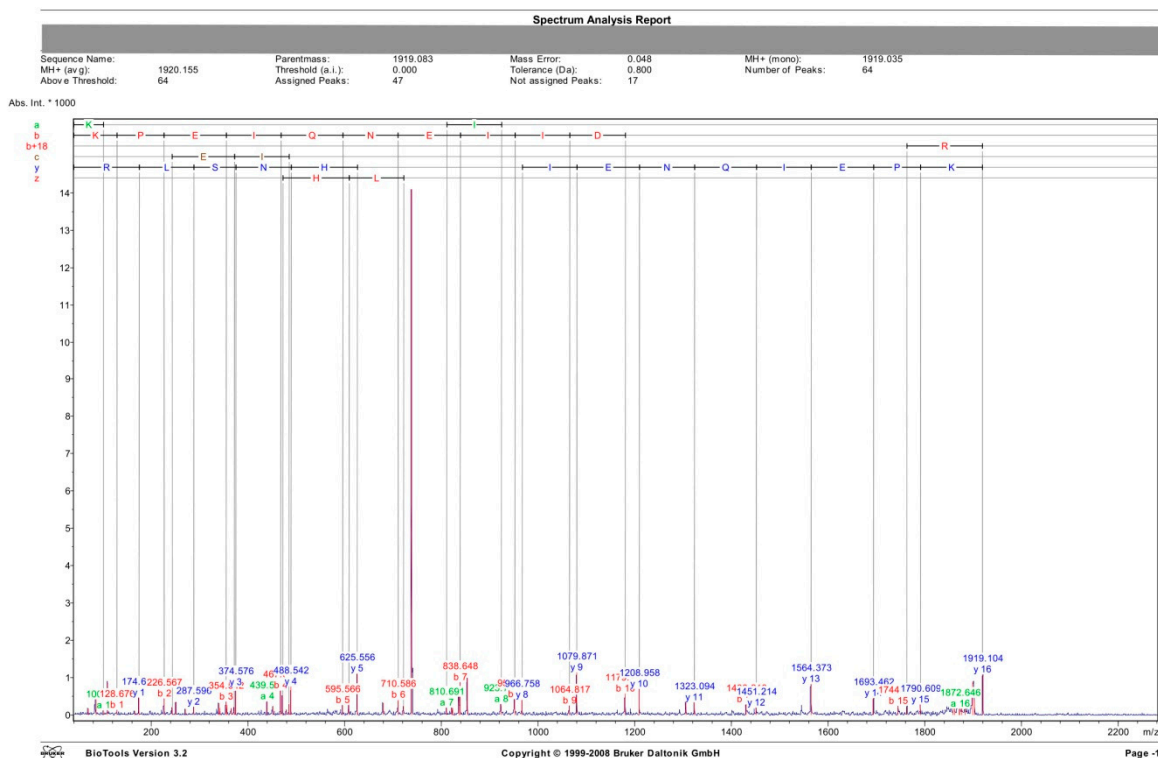

**Spectrum Analysis Report**

**Display Parameter:**

|                   |          |                     |       |                  |          |                  |          |
|-------------------|----------|---------------------|-------|------------------|----------|------------------|----------|
| Parentmass:       | 1919.083 | Mass Error:         | 0.048 | MH+ (mono):      | 1919.035 | MH+ (avg):       | 1920.155 |
| Threshold (a.i.): | 0.000    | Tolerance (Da):     | 0.800 | Number of Peaks: | 64       | Above Threshold: | 64       |
| Assigned Peaks:   | 47       | Not assigned Peaks: | 17    |                  |          |                  |          |

**Peaklist:**

| Peak | Mass     | Intensity | Peak | Mass     | Intensity | Peak | Mass     | Intensity | Peak | Mass     | Intensity | Peak | Mass     | Intensity |
|------|----------|-----------|------|----------|-----------|------|----------|-----------|------|----------|-----------|------|----------|-----------|
| 1    | 69.743   | 183.296   | 2    | 85.737   | 547.237   | 3    | 100.669  | 124.960   | 4    | 109.657  | 862.611   | 5    | 126.676  | 133.026   |
| 6    | 165.593  | 113.922   | 7    | 174.630  | 481.209   | 8    | 226.567  | 439.126   | 9    | 243.539  | 204.624   | 10   | 250.162  | 350.474   |
| 11   | 270.587  | 163.836   | 12   | 287.596  | 219.746   | 13   | 339.556  | 321.415   | 14   | 341.565  | 191.932   | 15   | 354.542  | 357.949   |
| 16   | 356.539  | 271.400   | 17   | 365.528  | 184.930   | 18   | 371.485  | 216.771   | 19   | 374.576  | 741.663   | 20   | 439.571  | 366.190   |
| 21   | 451.549  | 247.241   | 22   | 467.541  | 659.776   | 23   | 471.535  | 537.121   | 24   | 479.497  | 150.776   | 25   | 484.530  | 303.255   |
| 26   | 488.542  | 760.584   | 27   | 595.566  | 264.610   | 28   | 608.550  | 451.697   | 29   | 625.556  | 1111.603  | 30   | 679.580  | 331.562   |
| 31   | 710.586  | 408.518   | 32   | 721.596  | 246.278   | 33   | 738.618  | 14315.169 | 34   | 810.691  | 193.603   | 35   | 821.572  | 195.225   |
| 36   | 823.631  | 189.622   | 37   | 838.619  | 729.155   | 38   | 838.648  | 676.129   | 39   | 853.648  | 994.284   | 40   | 923.726  | 292.645   |
| 41   | 951.750  | 422.505   | 42   | 966.758  | 404.363   | 43   | 1064.817 | 250.717   | 44   | 1079.871 | 1141.066  | 45   | 1179.903 | 573.248   |
| 46   | 1208.958 | 696.111   | 47   | 1306.034 | 356.315   | 48   | 1323.094 | 335.478   | 49   | 1430.218 | 286.163   | 50   | 1451.214 | 193.102   |
| 51   | 1564.373 | 830.713   | 52   | 1693.462 | 453.762   | 53   | 1744.548 | 238.599   | 54   | 1762.588 | 205.268   | 55   | 1790.609 | 276.629   |
| 56   | 1858.073 | 273.107   | 57   | 1861.462 | 162.332   | 58   | 1870.262 | 168.108   | 59   | 1872.646 | 167.528   | 60   | 1876.000 | 187.942   |
| 61   | 1883.316 | 162.279   | 62   | 1899.004 | 898.076   | 63   | 1902.249 | 410.830   | 64   | 1919.104 | 1082.336  |      |          |           |

**Calculated Masses:**  
KPEIQNEIIDLHNSLR

| N-Term | Ion | a        | a-17     | a-18     | b        | b-17     | b-18     | b+18     | c        | i       | x        | y        | z        | C-Term | Ion |
|--------|-----|----------|----------|----------|----------|----------|----------|----------|----------|---------|----------|----------|----------|--------|-----|
| 1      | K   | 161.107  | 84.081   | 83.097   | 129.102  | 112.076  | 111.092  | 147.113  | 146.129  | 101.107 | 201.098  | 175.119  | 158.092  | 16     | R   |
| 2      | P   | 198.160  | 181.134  | 180.150  | 226.155  | 209.129  | 208.144  | 244.166  | 243.182  | 70.965  | 314.192  | 288.203  | 271.176  | 15     | L   |
| 3      | E   | 327.203  | 310.176  | 309.192  | 355.198  | 338.171  | 337.187  | 373.208  | 372.224  | 102.055 | 401.214  | 375.235  | 358.208  | 14     | S   |
| 4      | I   | 446.287  | 423.260  | 422.276  | 468.282  | 451.255  | 450.271  | 486.292  | 485.308  | 86.096  | 515.257  | 489.278  | 472.251  | 13     | N   |
| 5      | Q   | 568.345  | 551.319  | 550.335  | 596.340  | 579.314  | 578.330  | 614.351  | 613.367  | 101.071 | 652.316  | 626.337  | 609.310  | 12     | H   |
| 6      | N   | 682.388  | 665.362  | 664.378  | 710.383  | 693.357  | 692.373  | 728.394  | 727.410  | 87.055  | 765.400  | 739.421  | 722.394  | 11     | L   |
| 7      | E   | 811.431  | 794.404  | 793.420  | 839.426  | 822.399  | 821.415  | 857.436  | 856.452  | 102.055 | 880.427  | 854.448  | 837.421  | 10     | D   |
| 8      | I   | 924.515  | 907.488  | 906.504  | 952.510  | 935.483  | 934.499  | 970.520  | 969.536  | 86.096  | 993.511  | 967.532  | 950.505  | 9      | I   |
| 9      | I   | 1037.599 | 1020.572 | 1019.588 | 1065.594 | 1048.567 | 1047.583 | 1083.604 | 1082.620 | 86.096  | 1106.595 | 1080.616 | 1063.589 | 8      | I   |
| 10     | D   | 1152.626 | 1135.599 | 1134.615 | 1180.621 | 1163.594 | 1162.610 | 1198.631 | 1197.647 | 88.039  | 1235.638 | 1209.659 | 1192.632 | 7      | E   |
| 11     | L   | 1265.710 | 1248.683 | 1247.699 | 1293.705 | 1276.678 | 1275.694 | 1311.715 | 1310.731 | 86.096  | 1349.681 | 1323.702 | 1306.675 | 6      | N   |
| 12     | H   | 1402.769 | 1385.742 | 1384.758 | 1430.764 | 1413.737 | 1412.753 | 1448.774 | 1447.790 | 110.071 | 1477.739 | 1451.760 | 1434.734 | 5      | Q   |
| 13     | N   | 1516.812 | 1499.785 | 1498.801 | 1544.807 | 1527.780 | 1526.796 | 1562.817 | 1561.833 | 87.055  | 1590.823 | 1564.844 | 1547.818 | 4      | I   |
| 14     | S   | 1603.844 | 1586.817 | 1585.833 | 1631.839 | 1614.812 | 1613.828 | 1649.849 | 1648.865 | 60.044  | 1719.866 | 1693.887 | 1676.860 | 3      | E   |
| 15     | L   | 1716.928 | 1699.901 | 1698.917 | 1744.923 | 1727.896 | 1726.912 | 1762.933 | 1761.949 | 86.096  | 1816.919 | 1790.940 | 1773.913 | 2      | P   |
| 16     | R   | 1873.029 | 1856.002 | 1855.018 | 1901.024 | 1883.997 | 1883.013 | 1919.034 | 1918.050 | 129.113 | 1945.014 | 1919.034 | 1902.008 | 1      | K   |

BioTools Version 3.2 Copyright © 1999-2008 Bruker Daltonik GmbH Page 2-

### Area 6. Annotated MS spectrum.

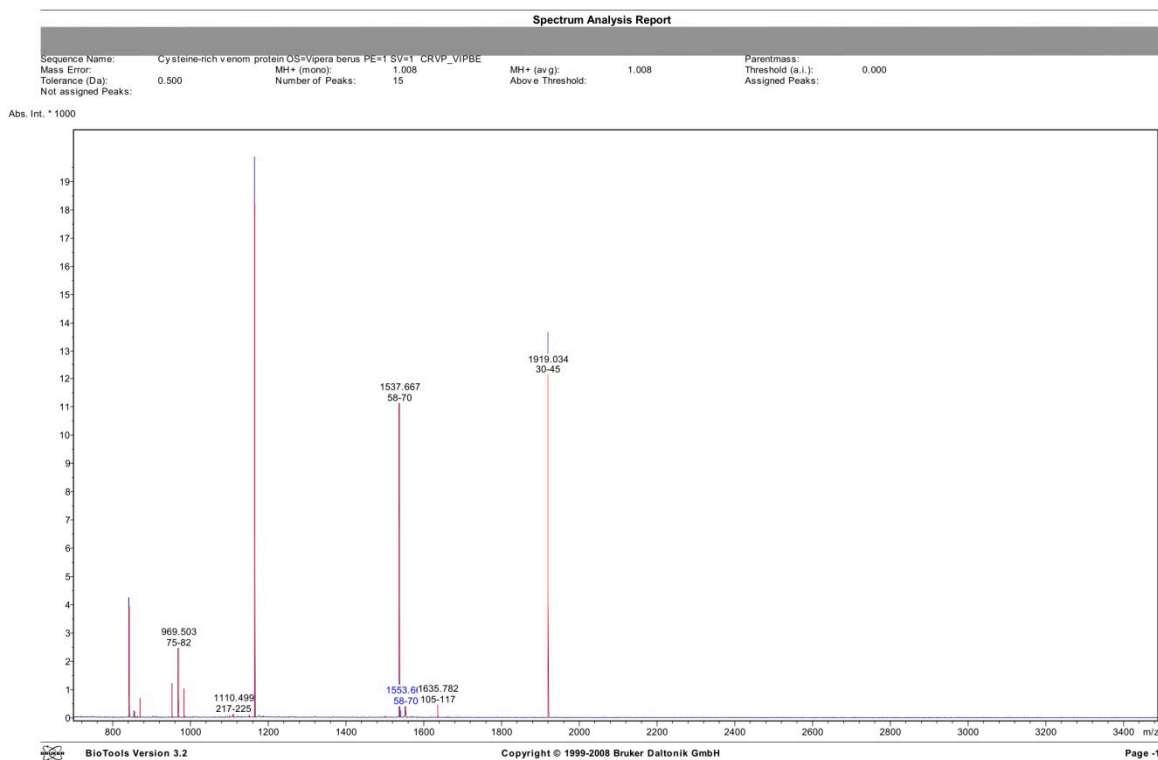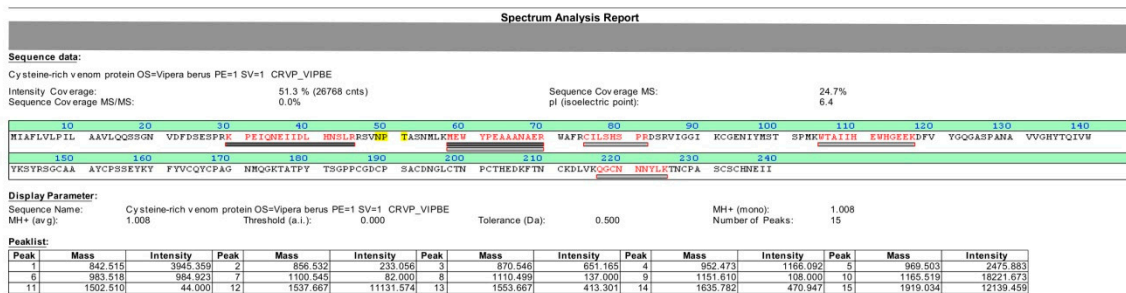



Area 7. Annotated MS/MS spectrum of ion 1352.702 m/z.

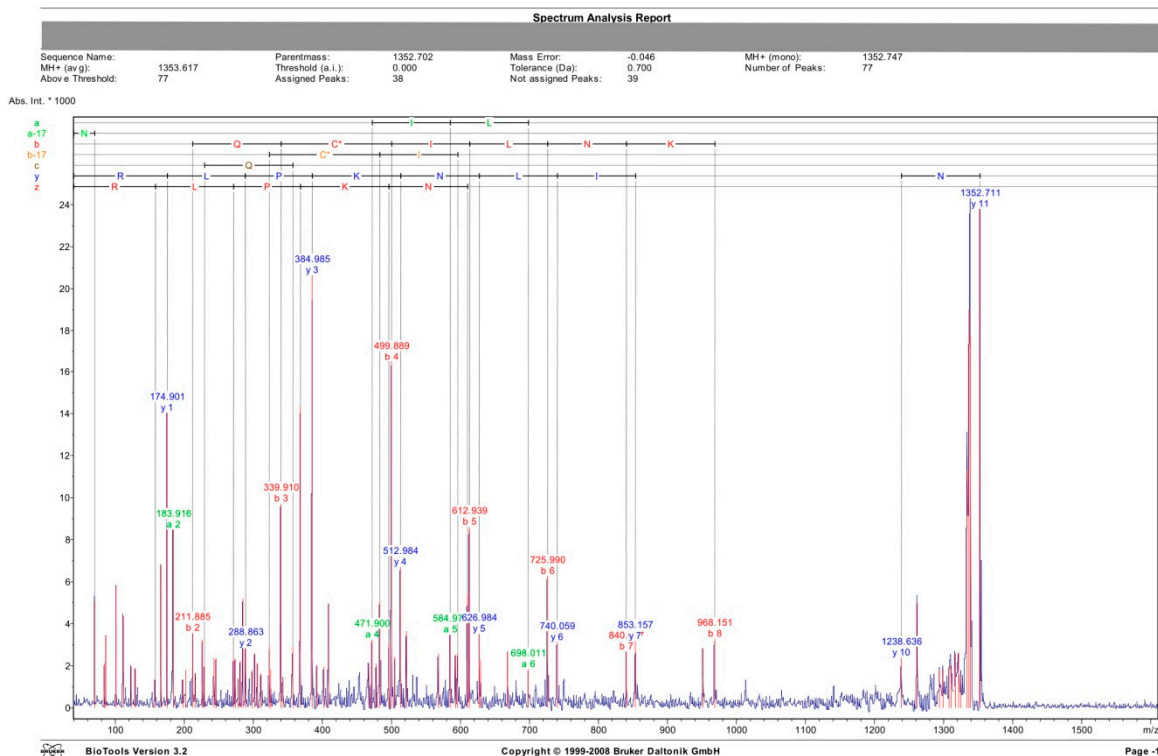

**Spectrum Analysis Report**

Display Parameter: Parentmass: 1352.702 Mass Error: -0.046 MH+ (mono): 1352.747 MH+ (avg): 1353.617  
 Threshold (a.i.): 0.000 Tolerance (Da): 0.700 Number of Peaks: 77 Above Threshold: 77  
 Assigned Peaks: 38 Not assigned Peaks: 39

**Peaklist:**

| Peak | Mass     | Intensity | Peak | Mass     | Intensity | Peak | Mass     | Intensity | Peak | Mass     | Intensity | Peak | Mass     | Intensity |
|------|----------|-----------|------|----------|-----------|------|----------|-----------|------|----------|-----------|------|----------|-----------|
| 1    | 69.910   | 5065.252  | 2    | 83.872   | 2102.419  | 3    | 85.917   | 3457.762  | 4    | 100.895  | 5758.177  | 5    | 111.885  | 4371.352  |
| 6    | 122.876  | 1974.106  | 7    | 128.902  | 1851.665  | 8    | 157.876  | 1329.482  | 9    | 165.920  | 6765.764  | 10   | 174.901  | 14039.176 |
| 11   | 183.916  | 8476.028  | 12   | 197.881  | 1342.141  | 13   | 201.866  | 1805.846  | 14   | 211.885  | 3567.100  | 15   | 215.872  | 1576.102  |
| 16   | 225.896  | 3247.634  | 17   | 228.897  | 2012.625  | 18   | 242.878  | 2379.322  | 19   | 245.892  | 2348.402  | 20   | 270.923  | 2374.222  |
| 21   | 273.887  | 2327.583  | 22   | 277.870  | 1402.269  | 23   | 280.901  | 2241.263  | 24   | 284.930  | 5205.458  | 25   | 288.883  | 2848.883  |
| 26   | 297.926  | 1804.046  | 27   | 301.948  | 2619.556  | 28   | 305.888  | 2137.419  | 29   | 310.960  | 1628.405  | 30   | 322.888  | 2925.059  |
| 31   | 324.958  | 1829.386  | 32   | 339.910  | 9718.122  | 33   | 342.921  | 1495.028  | 34   | 356.924  | 2905.438  | 35   | 367.966  | 14354.929 |
| 36   | 384.985  | 29649.534 | 37   | 391.896  | 2055.676  | 38   | 401.915  | 1955.561  | 39   | 408.913  | 4974.402  | 40   | 487.060  | 2059.741  |
| 41   | 471.900  | 3247.470  | 42   | 477.964  | 2110.729  | 43   | 482.893  | 5106.122  | 44   | 495.973  | 3065.326  | 45   | 499.889  | 16508.671 |
| 46   | 504.931  | 2442.597  | 47   | 512.984  | 6708.245  | 48   | 521.951  | 3648.397  | 49   | 567.992  | 2979.260  | 50   | 584.971  | 3495.130  |
| 51   | 592.968  | 2351.508  | 52   | 598.918  | 2929.541  | 53   | 609.987  | 5385.368  | 54   | 612.939  | 8611.992  | 55   | 626.984  | 3522.573  |
| 56   | 628.961  | 2267.172  | 57   | 668.150  | 2673.040  | 58   | 698.011  | 1835.941  | 59   | 725.990  | 6273.565  | 60   | 740.059  | 3126.003  |
| 61   | 840.047  | 2679.019  | 62   | 853.157  | 3181.052  | 63   | 951.198  | 2795.373  | 64   | 968.151  | 3284.891  | 65   | 1238.636 | 2388.804  |
| 66   | 1281.876 | 4979.990  | 67   | 1293.812 | 1808.184  | 68   | 1298.874 | 1837.302  | 69   | 1307.571 | 1851.768  | 70   | 1310.845 | 2023.643  |
| 71   | 1316.960 | 2578.750  | 72   | 1321.573 | 2655.980  | 73   | 1324.876 | 1475.611  | 74   | 1333.454 | 11352.822 | 75   | 1336.458 | 19014.176 |
| 76   | 1338.504 | 17785.474 | 77   | 1352.711 | 23800.547 |      |          |           |      |          |           |      |          |           |

**Calculated Masses:**  
 NPQCLLNKPLR 4: Carbamidomethyl (C)

| N-Term | Ion | a              | a-17           | a-18           | b              | b-17           | b-18            | b+18            | c              | l              | x        | y               | z              | C-Term | Ion |
|--------|-----|----------------|----------------|----------------|----------------|----------------|-----------------|-----------------|----------------|----------------|----------|-----------------|----------------|--------|-----|
| 1      | N   | 87.055         | <b>76.029</b>  | 69.045         | 115.050        | 98.024         | 97.040          | 133.081         | 132.077        | 87.055         | 201.098  | <b>175.119</b>  | <b>158.092</b> | 11     | R   |
| 2      | P   | <b>184.108</b> | 167.082        | <b>166.097</b> | <b>212.103</b> | 195.076        | 194.092         | 230.114         | <b>229.130</b> | <b>70.065</b>  | 314.182  | <b>288.203</b>  | <b>271.176</b> | 10     | L   |
| 3      | Q   | 312.167        | 295.140        | 294.156        | <b>340.162</b> | <b>323.135</b> | 322.151         | 358.172         | <b>357.188</b> | <b>101.071</b> | 411.235  | <b>385.256</b>  | <b>368.229</b> | 9      | P   |
| 4      | C*  | <b>472.197</b> | 455.171        | 454.187        | <b>500.192</b> | <b>483.166</b> | 482.182         | 518.203         | 517.219        | 133.043        | 539.330  | <b>513.351</b>  | <b>496.324</b> | 8      | K   |
| 5      | I   | <b>585.211</b> | <b>568.255</b> | 567.271        | <b>613.276</b> | <b>596.250</b> | <b>595.266</b>  | 631.287         | 630.303        | <b>86.096</b>  | 653.373  | <b>627.394</b>  | <b>610.367</b> | 7      | N   |
| 6      | L   | <b>698.365</b> | 681.339        | 680.355        | <b>726.360</b> | 709.334        | 708.350         | 744.371         | 743.387        | <b>86.096</b>  | 796.457  | <b>740.478</b>  | <b>723.451</b> | 6      | L   |
| 7      | N   | 812.408        | 795.382        | 794.398        | <b>840.403</b> | 823.377        | 822.393         | 858.414         | 857.430        | 87.055         | 879.541  | <b>853.562</b>  | 836.535        | 5      | I   |
| 8      | K   | 940.503        | 923.477        | 922.493        | <b>968.498</b> | <b>951.472</b> | <b>950.488</b>  | 996.509         | 995.525        | <b>101.107</b> | 1039.572 | 1013.552        | 996.566        | 4      | C*  |
| 9      | P   | 1037.556       | 1020.530       | 1019.545       | 1065.551       | 1048.524       | 1047.540        | 1083.562        | 1082.578       | <b>70.065</b>  | 1167.630 | 1141.651        | 1124.624       | 3      | Q   |
| 10     | L   | 1150.640       | 1133.614       | 1132.630       | 1178.635       | 1161.608       | 1160.624        | 1196.646        | 1195.662       | <b>86.096</b>  | 1264.683 | <b>1238.704</b> | 1221.677       | 2      | P   |
| 11     | R   | 1306.741       | 1289.715       | 1288.731       | 1334.736       | 1317.710       | <b>1316.726</b> | <b>1352.747</b> | 1351.763       | <b>129.113</b> | 1378.726 | <b>1352.747</b> | 1335.720       | 1      | N   |

BioTools Version 3.2 Copyright © 1999-2008 Bruker Daltonik GmbH Page 2-

Area 8. Annotated MS/MS spectrum of ion 906.470 m/z.

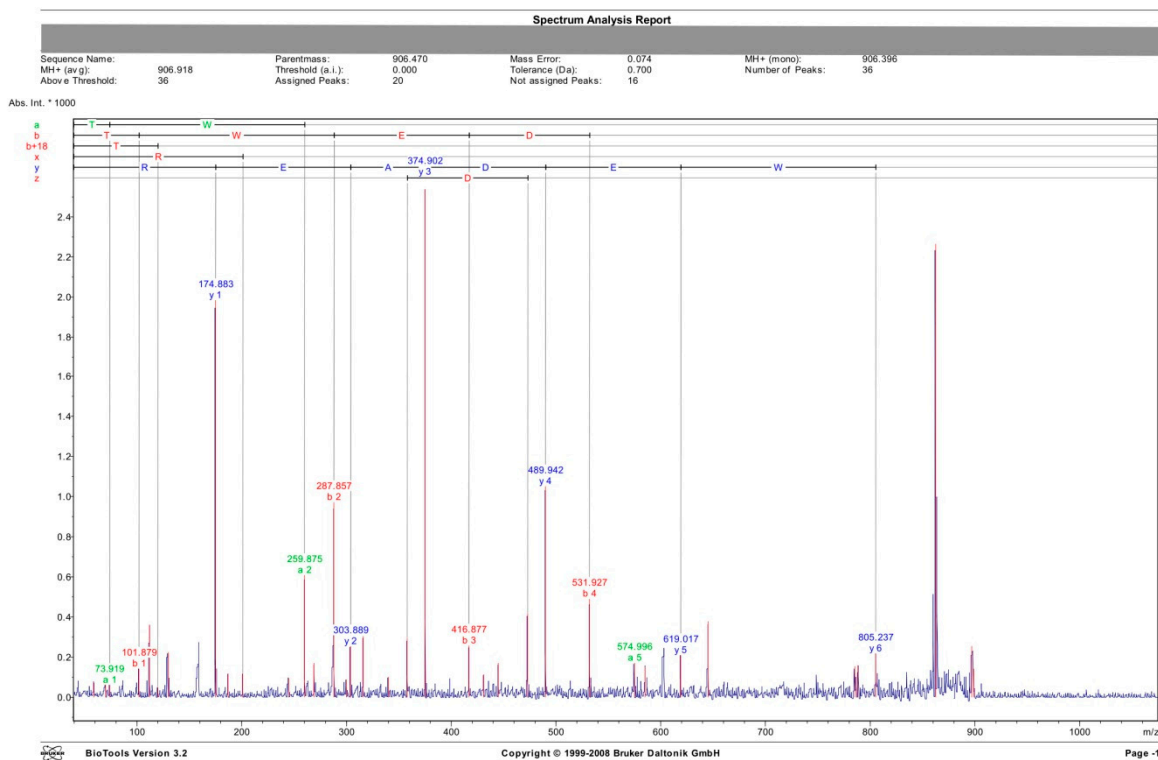

**Spectrum Analysis Report**

**Display Parameter:**

|                   |         |                     |       |                  |         |                  |         |
|-------------------|---------|---------------------|-------|------------------|---------|------------------|---------|
| Parentmass:       | 906.470 | Mass Error:         | 0.074 | MH+ (mono):      | 906.396 | MH+ (avg):       | 906.918 |
| Threshold (a.i.): | 0.000   | Tolerance (Da):     | 0.700 | Number of Peaks: | 36      | Above Threshold: | 36      |
| Assigned Peaks:   | 20      | Not assigned Peaks: | 16    |                  |         |                  |         |

**Peaklist:**

| Peak | Mass    | Intensity | Peak | Mass    | Intensity | Peak | Mass    | Intensity | Peak | Mass    | Intensity | Peak | Mass    | Intensity |
|------|---------|-----------|------|---------|-----------|------|---------|-----------|------|---------|-----------|------|---------|-----------|
| 1    | 58.919  | 73.528    | 2    | 69.922  | 119.166   | 3    | 73.919  | 61.187    | 4    | 101.879 | 143.001   | 5    | 111.903 | 362.691   |
| 6    | 119.914 | 48.501    | 7    | 129.895 | 225.340   | 8    | 174.883 | 1984.574  | 9    | 188.853 | 117.581   | 10   | 200.847 | 119.080   |
| 11   | 244.825 | 96.662    | 12   | 259.875 | 608.640   | 13   | 268.851 | 171.612   | 14   | 287.857 | 972.167   | 15   | 299.856 | 89.139    |
| 16   | 303.889 | 254.334   | 17   | 315.845 | 304.714   | 18   | 339.896 | 101.396   | 19   | 357.875 | 293.583   | 20   | 374.902 | 2600.803  |
| 21   | 416.877 | 297.521   | 22   | 430.899 | 114.263   | 23   | 444.879 | 171.333   | 24   | 472.912 | 417.532   | 25   | 489.942 | 1051.690  |
| 26   | 531.927 | 490.850   | 27   | 574.996 | 172.049   | 28   | 585.032 | 152.353   | 29   | 619.017 | 209.573   | 30   | 645.034 | 378.852   |
| 31   | 785.239 | 153.821   | 32   | 788.156 | 160.231   | 33   | 805.237 | 217.994   | 34   | 862.402 | 2265.972  | 35   | 896.831 | 255.080   |
| 36   | 898.793 | 143.110   |      |         |           |      |         |           |      |         |           |      |         |           |

**Calculated Masses:**  
TWEDAER

| N-Term | Ion | a       | a-17    | a-18    | b       | b-17    | b-18    | b+18    | c       | i       | x       | y       | z       | C-Term | Ion |
|--------|-----|---------|---------|---------|---------|---------|---------|---------|---------|---------|---------|---------|---------|--------|-----|
| 1      | T   | 74.060  | 57.033  | 58.049  | 102.055 | 85.028  | 84.044  | 120.066 | 119.082 | 74.060  | 291.098 | 175.119 | 158.092 | 7      | R   |
| 2      | W   | 260.139 | 243.113 | 242.129 | 288.134 | 271.108 | 270.124 | 306.145 | 305.161 | 159.092 | 330.141 | 304.162 | 287.135 | 6      | E   |
| 3      | E   | 389.182 | 372.155 | 371.171 | 417.177 | 400.150 | 399.166 | 435.187 | 434.203 | 102.055 | 401.178 | 375.199 | 358.172 | 5      | A   |
| 4      | D   | 594.209 | 487.182 | 486.198 | 532.204 | 515.177 | 514.193 | 550.214 | 549.230 | 88.039  | 518.205 | 490.226 | 473.199 | 4      | D   |
| 5      | A   | 575.246 | 558.219 | 557.235 | 603.241 | 586.214 | 585.230 | 621.251 | 620.267 | 44.040  | 645.247 | 619.268 | 602.242 | 3      | E   |
| 6      | E   | 704.289 | 687.262 | 686.278 | 732.284 | 715.257 | 714.273 | 750.294 | 749.310 | 102.055 | 831.327 | 805.348 | 788.321 | 2      | W   |
| 7      | R   | 860.390 | 843.363 | 842.379 | 888.385 | 871.358 | 870.374 | 906.395 | 905.411 | 129.113 | 932.374 | 906.395 | 889.369 | 1      | T   |

BioTools Version 3.2 Copyright © 1999-2008 Bruker Daltonik GmbH Page -2-

Area 8. Annotated MS/MS spectrum of ion 1033.604 m/z.

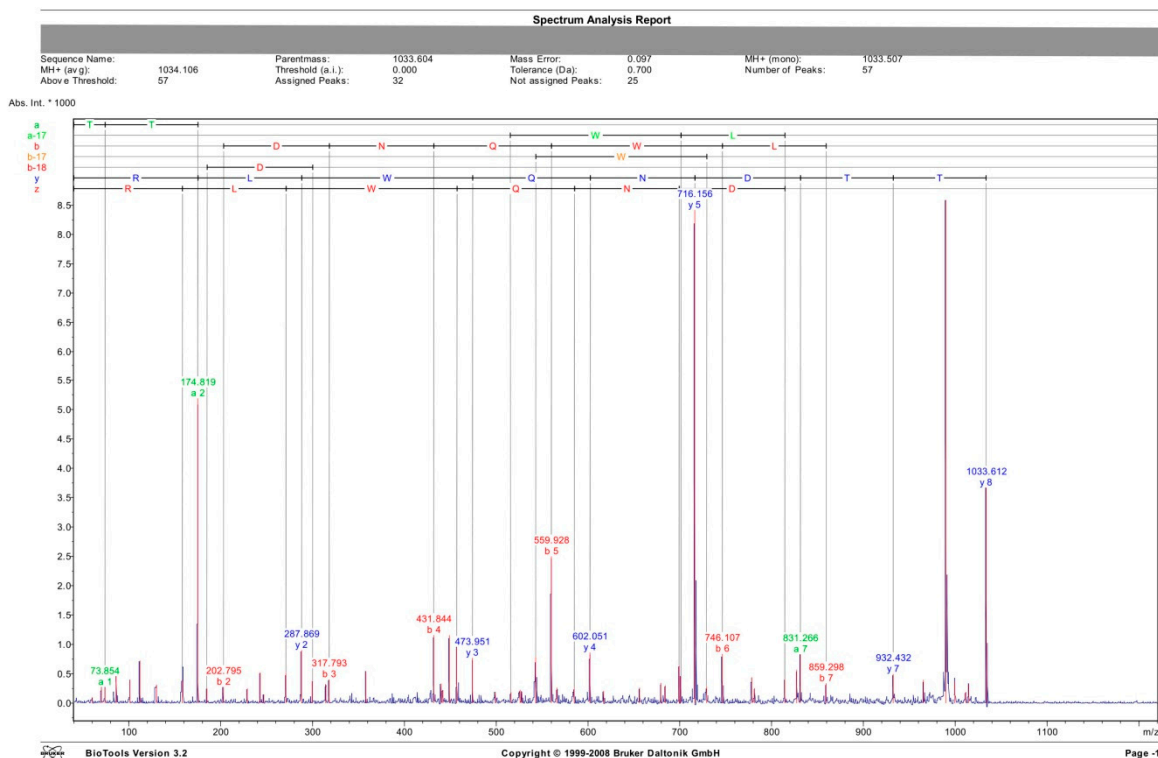

**Spectrum Analysis Report**

**Display Parameter:**

|                   |          |                     |       |                  |          |                  |          |
|-------------------|----------|---------------------|-------|------------------|----------|------------------|----------|
| Parentmass:       | 1033.604 | Mass Error:         | 0.097 | MH+ (mono):      | 1033.507 | MH+ (avg):       | 1034.106 |
| Threshold (a.i.): | 0.000    | Tolerance (Da):     | 0.700 | Number of Peaks: | 57       | Above Threshold: | 57       |
| Assigned Peaks:   | 32       | Not assigned Peaks: | 25    |                  |          |                  |          |

**Peaklist:**

| Peak | Mass     | Intensity | Peak | Mass     | Intensity | Peak | Mass    | Intensity | Peak | Mass    | Intensity | Peak | Mass     | Intensity |
|------|----------|-----------|------|----------|-----------|------|---------|-----------|------|---------|-----------|------|----------|-----------|
| 1    | 59.840   | 101.370   | 2    | 69.846   | 437.583   | 3    | 73.854  | 274.026   | 4    | 85.863  | 528.492   | 5    | 100.833  | 399.318   |
| 6    | 111.833  | 725.201   | 7    | 129.803  | 308.694   | 8    | 157.791 | 393.084   | 9    | 174.819 | 5189.708  | 10   | 184.781  | 253.816   |
| 11   | 202.795  | 278.433   | 12   | 228.818  | 253.908   | 13   | 242.789 | 524.628   | 14   | 246.775 | 150.569   | 15   | 270.846  | 513.006   |
| 16   | 287.869  | 905.603   | 17   | 299.828  | 378.465   | 18   | 313.856 | 325.729   | 19   | 317.793 | 404.945   | 20   | 357.802  | 541.391   |
| 21   | 431.844  | 1168.222  | 22   | 439.870  | 335.817   | 23   | 441.825 | 220.350   | 24   | 448.872 | 1159.970  | 25   | 456.913  | 1100.983  |
| 26   | 473.951  | 772.124   | 27   | 498.911  | 195.145   | 28   | 515.874 | 188.803   | 29   | 525.890 | 226.461   | 30   | 527.933  | 198.167   |
| 31   | 542.889  | 786.334   | 32   | 569.928  | 2498.327  | 33   | 565.996 | 266.541   | 34   | 584.994 | 254.202   | 35   | 602.051  | 864.990   |
| 36   | 616.989  | 209.650   | 37   | 658.068  | 265.087   | 38   | 679.103 | 348.157   | 39   | 684.045 | 303.659   | 40   | 698.106  | 637.395   |
| 41   | 701.044  | 458.358   | 42   | 716.156  | 8417.641  | 43   | 729.063 | 283.549   | 44   | 746.107 | 840.568   | 45   | 778.231  | 440.221   |
| 46   | 781.265  | 257.797   | 47   | 814.238  | 403.801   | 48   | 827.212 | 671.534   | 49   | 831.266 | 834.490   | 50   | 859.298  | 337.601   |
| 51   | 932.432  | 495.990   | 52   | 965.330  | 398.028   | 53   | 989.548 | 8714.517  | 54   | 999.542 | 363.953   | 55   | 1011.521 | 194.321   |
| 56   | 1014.629 | 322.874   | 57   | 1033.612 | 3667.912  |      |         |           |      |         |           |      |          |           |

**Calculated Masses:**

TTDNGWLR

| N-Term | Ion | a       | a-17    | a-18    | b        | b-17    | b-18    | b+18     | c        | i       | j        | x        | y        | z | C-Term | Ion |
|--------|-----|---------|---------|---------|----------|---------|---------|----------|----------|---------|----------|----------|----------|---|--------|-----|
| 1      | T   | 74.060  | 57.033  | 56.049  | 102.055  | 85.028  | 84.044  | 120.066  | 119.082  | 74.060  | 201.088  | 175.119  | 158.092  | 5 | R      |     |
| 2      | T   | 175.168 | 158.081 | 157.097 | 203.103  | 186.076 | 185.092 | 221.113  | 220.129  | 74.060  | 314.182  | 288.203  | 271.176  | 7 | L      |     |
| 3      | D   | 290.135 | 273.108 | 272.124 | 318.130  | 301.103 | 300.119 | 336.140  | 335.156  | 88.039  | 500.202  | 474.282  | 457.256  | 6 | W      |     |
| 4      | N   | 404.178 | 387.151 | 386.167 | 432.173  | 415.146 | 414.162 | 450.183  | 449.199  | 87.055  | 628.320  | 602.341  | 585.314  | 5 | Q      |     |
| 5      | Q   | 532.236 | 515.210 | 514.226 | 560.231  | 543.205 | 542.221 | 578.242  | 577.258  | 101.071 | 742.363  | 716.384  | 699.357  | 4 | N      |     |
| 6      | W   | 718.315 | 701.289 | 700.305 | 746.310  | 729.284 | 728.300 | 764.321  | 763.337  | 159.092 | 857.390  | 831.411  | 814.384  | 3 | D      |     |
| 7      | L   | 831.400 | 814.373 | 813.389 | 859.394  | 842.368 | 841.384 | 877.405  | 876.421  | 86.096  | 958.438  | 932.458  | 915.432  | 2 | T      |     |
| 8      | R   | 987.501 | 970.474 | 969.490 | 1015.495 | 998.469 | 997.485 | 1033.506 | 1032.522 | 129.113 | 1059.485 | 1033.506 | 1016.480 | 1 | T      |     |

BioTools Version 3.2 Copyright © 1999-2008 Bruker Daltonik GmbH Page -2-

Area 8. Annotated MS/MS spectrum of ion 1708.910 m/z.

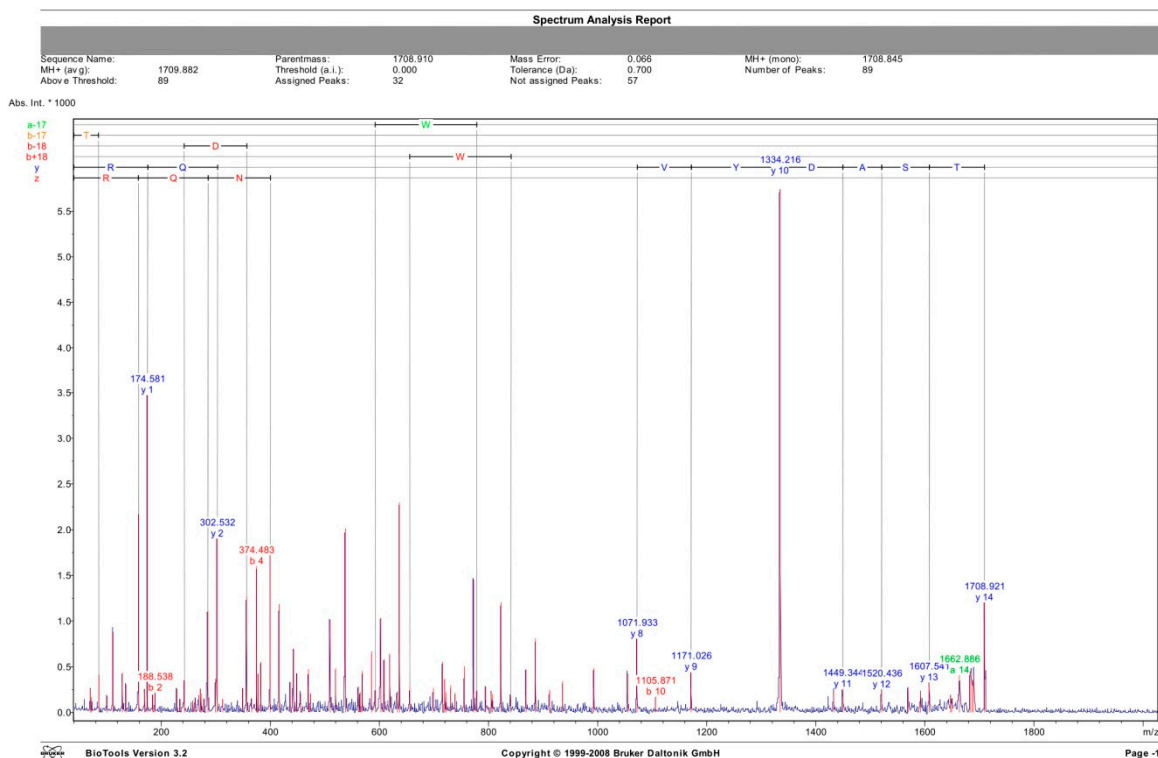

Spectrum Analysis Report

Display Parameter: Parentmass: 1708.910 Mass Error: 0.068 MH+ (mono): 1708.845 MH+ (avg): 1709.882  
 Threshold (a.i.): 0.000 Tolerance (Da): 0.700 Number of Peaks: 89 Above Threshold: 89  
 Assigned Peaks: 32 Not assigned Peaks: 57

| Peak | Mass     | Intensity | Peak | Mass     | Intensity | Peak | Mass     | Intensity | Peak | Mass     | Intensity | Peak | Mass     | Intensity |
|------|----------|-----------|------|----------|-----------|------|----------|-----------|------|----------|-----------|------|----------|-----------|
| 1    | 69.693   | 264.716   | 2    | 71.760   | 168.365   | 3    | 85.680   | 405.676   | 4    | 100.650  | 181.989   | 5    | 111.640  | 892.285   |
| 6    | 128.832  | 430.026   | 7    | 135.684  | 308.408   | 8    | 158.585  | 2163.922  | 9    | 169.530  | 236.952   | 10   | 174.581  | 3475.044  |
| 11   | 184.535  | 193.875   | 12   | 188.538  | 215.046   | 13   | 228.543  | 262.439   | 14   | 234.530  | 143.860   | 15   | 242.509  | 351.518   |
| 16   | 257.549  | 131.234   | 17   | 262.534  | 183.152   | 18   | 271.557  | 263.750   | 19   | 273.472  | 207.729   | 20   | 278.489  | 150.691   |
| 21   | 298.521  | 1112.268  | 22   | 299.533  | 368.081   | 23   | 302.532  | 1901.775  | 24   | 312.520  | 148.129   | 25   | 348.474  | 298.497   |
| 26   | 356.512  | 1276.036  | 27   | 365.487  | 154.426   | 28   | 374.483  | 1600.544  | 29   | 377.472  | 426.950   | 30   | 382.493  | 555.788   |
| 31   | 399.512  | 1783.981  | 32   | 416.517  | 1188.761  | 33   | 436.448  | 333.033   | 34   | 442.485  | 693.721   | 35   | 448.497  | 428.419   |
| 36   | 455.526  | 209.125   | 37   | 489.541  | 475.858   | 38   | 473.507  | 212.889   | 39   | 509.489  | 1015.786  | 40   | 519.488  | 482.350   |
| 41   | 537.477  | 2014.807  | 42   | 561.500  | 286.127   | 43   | 564.494  | 218.821   | 44   | 568.521  | 454.901   | 45   | 585.518  | 698.474   |
| 46   | 592.509  | 245.185   | 47   | 602.549  | 1035.823  | 48   | 608.557  | 584.374   | 49   | 618.534  | 643.592   | 50   | 632.536  | 229.486   |
| 51   | 636.534  | 2300.353  | 52   | 658.594  | 281.546   | 53   | 698.553  | 287.778   | 54   | 715.620  | 556.423   | 55   | 719.556  | 369.977   |
| 56   | 721.553  | 224.098   | 57   | 730.609  | 299.273   | 58   | 738.594  | 215.727   | 59   | 755.607  | 506.658   | 60   | 772.647  | 1454.402  |
| 61   | 778.573  | 253.699   | 62   | 794.591  | 285.718   | 63   | 804.637  | 232.461   | 64   | 806.632  | 200.703   | 65   | 822.624  | 1204.604  |
| 66   | 840.688  | 189.552   | 67   | 868.720  | 470.236   | 68   | 885.748  | 811.804   | 69   | 911.696  | 247.492   | 70   | 935.725  | 342.734   |
| 71   | 992.750  | 485.733   | 72   | 1054.857 | 427.905   | 73   | 1071.933 | 806.260   | 74   | 1105.871 | 172.301   | 75   | 1171.026 | 442.651   |
| 76   | 1334.216 | 5888.905  | 77   | 1432.326 | 228.242   | 78   | 1449.344 | 256.885   | 79   | 1520.436 | 251.054   | 80   | 1569.133 | 279.825   |
| 81   | 1591.428 | 196.577   | 82   | 1607.541 | 328.454   | 83   | 1646.898 | 198.769   | 84   | 1648.764 | 154.734   | 85   | 1662.886 | 408.585   |
| 86   | 1682.764 | 449.988   | 87   | 1685.724 | 337.695   | 88   | 1688.633 | 405.012   | 89   | 1708.921 | 1202.921  |      |          |           |

Calculated Masses:  
 TSADYVWGLWNGR

| N-Term | Ion | a               | a-17           | a-18     | b               | b-17           | b-18           | b+18            | c              | i              | x        | y               | z               | C-Term | Ion |
|--------|-----|-----------------|----------------|----------|-----------------|----------------|----------------|-----------------|----------------|----------------|----------|-----------------|-----------------|--------|-----|
| 1      | T   | 74.060          | 57.033         | 56.049   | 102.055         | <b>85.028</b>  | 84.044         | 120.066         | 119.082        | 74.060         | 201.098  | <b>175.119</b>  | <b>158.092</b>  | 14     | R   |
| 2      | S   | 161.092         | 144.066        | 143.082  | <b>189.087</b>  | 172.060        | 171.076        | 207.098         | 206.114        | 60.044         | 329.157  | <b>303.178</b>  | <b>286.151</b>  | 13     | Q   |
| 3      | A   | 232.129         | 215.103        | 214.119  | 260.124         | <b>243.098</b> | <b>242.114</b> | <b>278.135</b>  | 277.151        | 44.049         | 443.200  | 417.220         | <b>400.194</b>  | 12     | N   |
| 4      | D   | 347.156         | 330.130        | 329.146  | <b>375.151</b>  | 358.124        | <b>357.140</b> | 393.162         | 392.178        | 88.039         | 629.279  | 603.300         | 586.273         | 11     | W   |
| 5      | Y   | 510.219         | 493.193        | 492.209  | 538.214         | 521.188        | 520.204        | 556.225         | 555.241        | <b>136.076</b> | 742.363  | 716.384         | 699.357         | 10     | L   |
| 6      | V   | 609.288         | <b>592.261</b> | 591.277  | 637.283         | 620.256        | 619.272        | <b>655.293</b>  | 654.309        | <b>72.081</b>  | 799.385  | 773.405         | 756.379         | 9      | G   |
| 7      | W   | 795.367         | <b>778.341</b> | 777.357  | 823.362         | <b>806.336</b> | 805.352        | <b>841.373</b>  | <b>840.389</b> | <b>159.092</b> | 912.469  | 886.489         | 869.463         | 8      | I   |
| 8      | I   | 908.451         | 891.425        | 890.441  | 936.446         | 919.420        | 918.436        | 954.457         | 953.473        | <b>86.096</b>  | 1098.548 | <b>1072.569</b> | <b>1055.542</b> | 7      | W   |
| 9      | G   | 985.473         | 948.446        | 947.462  | 993.468         | 976.441        | 975.457        | 1011.478        | 1010.494       | 30.034         | 1197.616 | <b>1171.637</b> | 1154.611        | 6      | V   |
| 10     | L   | 1078.557        | 1061.530       | 1060.546 | <b>1106.552</b> | 1089.525       | 1088.541       | 1124.562        | 1123.578       | <b>86.096</b>  | 1360.680 | <b>1334.700</b> | 1317.674        | 5      | Y   |
| 11     | W   | 1264.636        | 1247.610       | 1246.626 | 1292.631        | 1275.604       | 1274.620       | 1310.642        | 1309.658       | <b>159.092</b> | 1475.707 | <b>1449.727</b> | <b>1432.701</b> | 4      | D   |
| 12     | N   | 1378.678        | 1361.652       | 1360.668 | 1406.674        | 1389.647       | 1388.663       | 1424.684        | 1423.700       | 87.055         | 1546.744 | <b>1520.764</b> | 1503.738        | 3      | A   |
| 13     | Q   | 1506.798        | 1489.771       | 1488.787 | 1534.793        | 1517.766       | 1516.782       | 1552.743        | 1551.759       | <b>101.071</b> | 1633.776 | <b>1607.797</b> | <b>1590.770</b> | 2      | S   |
| 14     | R   | <b>1662.839</b> | 1645.812       | 1644.828 | 1690.834        | 1673.807       | 1672.823       | <b>1708.844</b> | 1707.860       | <b>129.113</b> | 1734.823 | <b>1708.844</b> | 1691.818        | 1      | T   |

### Area 8. Annotated MS/MS spectrum of ion 920.462 m/z.

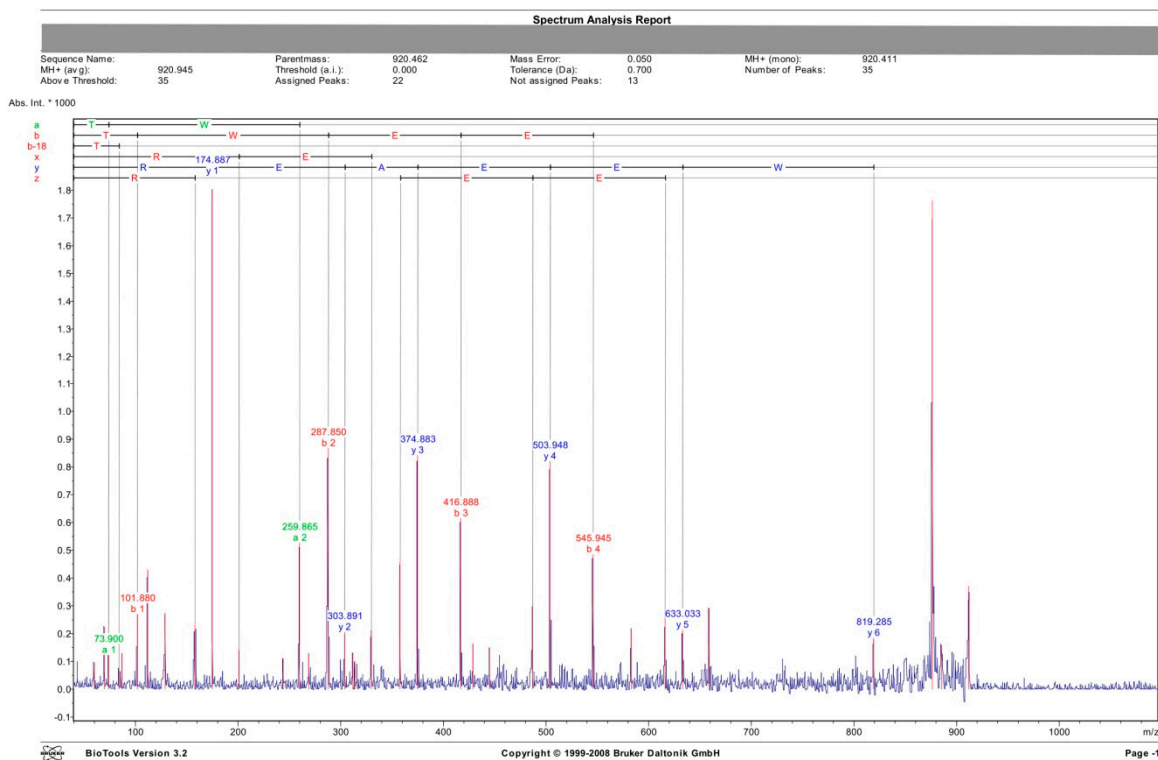

**Spectrum Analysis Report**

**Display Parameter:**

|                   |         |                     |       |                  |         |                  |         |
|-------------------|---------|---------------------|-------|------------------|---------|------------------|---------|
| Parentmass:       | 920.462 | Mass Error:         | 0.050 | MH+ (mono):      | 920.411 | MH+ (avg):       | 920.945 |
| Threshold (a.i.): | 0.000   | Tolerance (Da):     | 0.700 | Number of Peaks: | 35      | Above Threshold: | 35      |
| Assigned Peaks:   | 22      | Not assigned Peaks: | 13    |                  |         |                  |         |

**Peaklist:**

| Peak | Mass    | Intensity | Peak | Mass    | Intensity | Peak | Mass    | Intensity | Peak | Mass    | Intensity | Peak | Mass    | Intensity |
|------|---------|-----------|------|---------|-----------|------|---------|-----------|------|---------|-----------|------|---------|-----------|
| 1    | 59.892  | 96.345    | 2    | 69.900  | 225.016   | 3    | 73.900  | 123.150   | 4    | 83.947  | 74.618    | 5    | 86.919  | 127.255   |
| 6    | 101.880 | 270.253   | 7    | 111.901 | 431.080   | 8    | 128.897 | 274.830   | 9    | 157.872 | 230.725   | 10   | 174.887 | 185.706   |
| 11   | 200.840 | 143.767   | 12   | 243.862 | 112.382   | 13   | 289.865 | 526.660   | 14   | 268.850 | 129.909   | 15   | 287.850 | 867.312   |
| 16   | 303.891 | 205.426   | 17   | 311.832 | 131.390   | 18   | 318.858 | 100.588   | 19   | 329.831 | 210.146   | 20   | 357.859 | 458.432   |
| 21   | 374.883 | 842.048   | 22   | 418.888 | 815.411   | 23   | 428.870 | 165.408   | 24   | 448.870 | 150.327   | 25   | 486.878 | 301.315   |
| 26   | 503.948 | 820.205   | 27   | 545.945 | 485.607   | 28   | 583.036 | 205.010   | 29   | 615.987 | 254.610   | 30   | 633.033 | 213.817   |
| 31   | 659.039 | 291.379   | 32   | 819.285 | 184.862   | 33   | 876.392 | 1763.633  | 34   | 885.407 | 159.648   | 35   | 911.749 | 370.751   |

**Calculated Masses:**  
TWEEAER

| N-Term | Ion | a       | a-17    | a-18    | b       | b-17    | b-18    | b+18    | c       | l       | x       | y       | z       | C-Term | Ion |
|--------|-----|---------|---------|---------|---------|---------|---------|---------|---------|---------|---------|---------|---------|--------|-----|
| 1      | T   | 74.060  | 57.033  | 56.049  | 102.055 | 85.028  | 84.044  | 120.066 | 119.082 | 74.060  | 201.098 | 175.119 | 158.092 | 7      | R   |
| 2      | W   | 260.139 | 243.113 | 242.139 | 288.134 | 271.108 | 270.124 | 306.145 | 305.161 | 159.051 | 330.141 | 304.162 | 287.135 | 6      | E   |
| 3      | E   | 389.182 | 372.155 | 371.171 | 417.177 | 400.150 | 399.166 | 435.187 | 434.203 | 102.055 | 401.178 | 375.199 | 358.172 | 5      | A   |
| 4      | E   | 518.225 | 501.198 | 500.214 | 546.219 | 529.193 | 528.209 | 564.230 | 563.246 | 102.055 | 530.221 | 504.241 | 487.215 | 4      | E   |
| 5      | A   | 589.262 | 572.235 | 571.251 | 617.257 | 600.230 | 599.246 | 635.267 | 634.283 | 44.049  | 659.283 | 633.284 | 616.257 | 3      | E   |
| 6      | E   | 718.304 | 701.278 | 700.294 | 746.299 | 729.273 | 728.289 | 764.310 | 763.326 | 102.055 | 845.342 | 819.363 | 802.337 | 2      | W   |
| 7      | R   | 874.405 | 857.379 | 856.395 | 902.400 | 885.374 | 884.390 | 920.411 | 919.427 | 129.113 | 946.390 | 920.411 | 903.384 | 1      | T   |

BioTools Version 3.2 Copyright © 1999-2008 Bruker Daltonik GmbH Page -2-

Area 8. Annotated MS/MS spectrum of ion 1427.645 m/z.

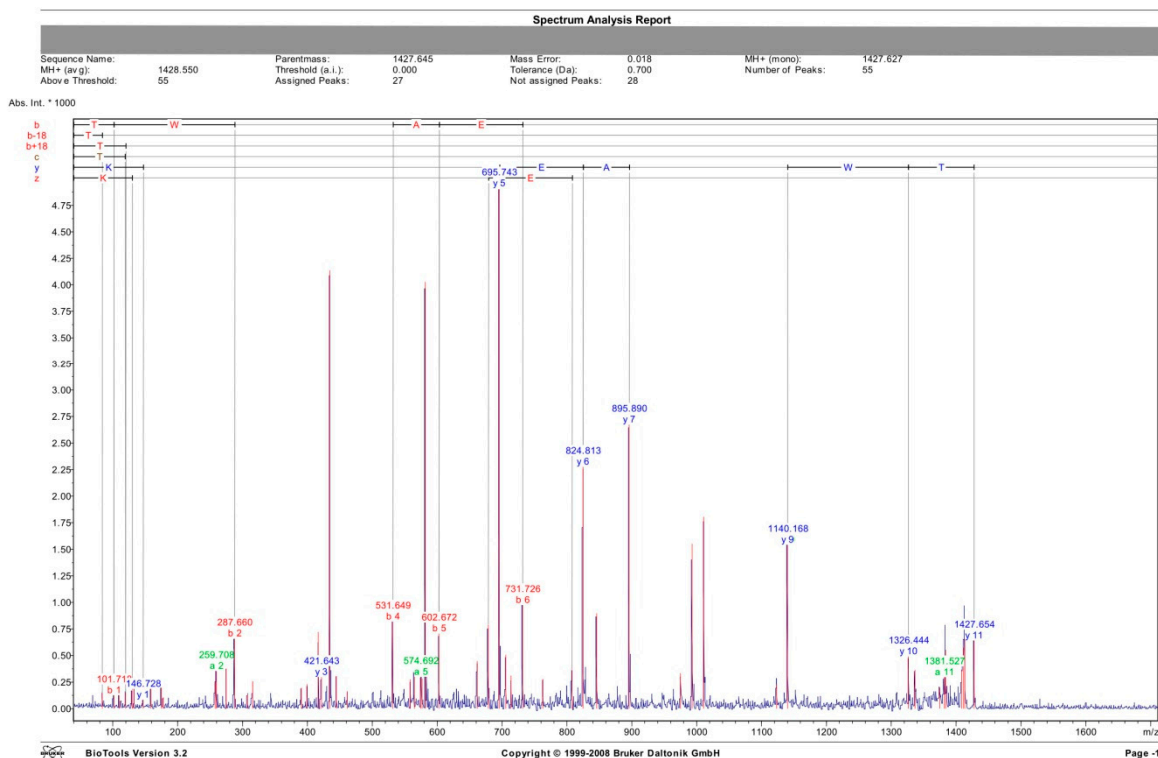

**Spectrum Analysis Report**

Display Parameter: Parentmass: 1427.645  
 Threshold (a.i.): 0.000  
 Assigned Peaks: 27  
 Mass Error: 0.018  
 Tolerance (Da): 0.700  
 Not assigned Peaks: 28  
 MH+ (mono): 1427.627  
 Number of Peaks: 55  
 MH+ (avg): 1428.550  
 Above Threshold: 55

**Peaklist:**

| Peak | Mass     | Intensity | Peak | Mass     | Intensity | Peak | Mass     | Intensity | Peak | Mass     | Intensity | Peak | Mass     | Intensity |
|------|----------|-----------|------|----------|-----------|------|----------|-----------|------|----------|-----------|------|----------|-----------|
| 1    | 83.770   | 144.580   | 2    | 101.718  | 125.030   | 3    | 109.708  | 136.340   | 4    | 119.712  | 151.598   | 5    | 129.709  | 170.773   |
| 6    | 132.861  | 242.407   | 7    | 146.129  | 83.109    | 8    | 158.890  | 238.530   | 9    | 174.694  | 198.569   | 10   | 177.668  | 103.013   |
| 11   | 257.694  | 256.620   | 12   | 259.708  | 354.628   | 13   | 274.702  | 378.302   | 14   | 287.660  | 659.658   | 15   | 307.634  | 136.978   |
| 16   | 315.641  | 258.347   | 17   | 390.651  | 196.284   | 18   | 399.664  | 231.286   | 19   | 416.652  | 721.904   | 20   | 421.643  | 297.300   |
| 21   | 434.672  | 4137.888  | 22   | 444.634  | 307.552   | 23   | 461.648  | 166.272   | 24   | 531.649  | 819.787   | 25   | 568.657  | 278.134   |
| 26   | 564.686  | 334.246   | 27   | 574.692  | 298.139   | 28   | 576.662  | 286.335   | 29   | 581.699  | 4029.075  | 30   | 602.672  | 707.719   |
| 31   | 661.697  | 447.624   | 32   | 678.712  | 789.238   | 33   | 695.743  | 4911.063  | 34   | 705.731  | 508.412   | 35   | 713.737  | 311.937   |
| 36   | 731.726  | 974.290   | 37   | 762.681  | 278.438   | 38   | 807.611  | 367.857   | 39   | 824.813  | 2277.068  | 40   | 845.795  | 698.486   |
| 41   | 895.890  | 2673.718  | 42   | 974.936  | 333.997   | 43   | 992.979  | 1552.715  | 44   | 1010.988 | 1807.045  | 45   | 1123.207 | 226.778   |
| 46   | 1140.168 | 1541.822  | 47   | 1326.444 | 491.706   | 48   | 1336.487 | 364.776   | 49   | 1374.892 | 199.717   | 50   | 1381.527 | 295.139   |
| 51   | 1383.731 | 553.662   | 52   | 1408.327 | 369.054   | 53   | 1411.200 | 973.370   | 54   | 1413.246 | 654.026   | 55   | 1427.654 | 641.563   |

**Calculated Masses:**  
 TWDEAEKFCNK 9: Carbamidomethyl (C)

| N-Term | Ion | a        | a-17     | a-18     | b        | b-17     | b-18     | b-18.044 | b+18     | c       | i        | x        | y        | z  | C-Term | Ion |
|--------|-----|----------|----------|----------|----------|----------|----------|----------|----------|---------|----------|----------|----------|----|--------|-----|
| 1      | T   | 74.060   | 57.033   | 58.049   | 102.055  | 85.028   | 84.044   | 120.866  | 119.082  | 74.060  | 173.092  | 147.113  | 130.086  | 11 | K      |     |
| 2      | W   | 260.139  | 243.113  | 242.129  | 288.134  | 271.108  | 270.124  | 306.145  | 305.161  | 199.092 | 287.135  | 261.156  | 244.129  | 10 | N      |     |
| 3      | D   | 375.166  | 358.140  | 357.156  | 403.161  | 386.135  | 385.151  | 421.172  | 420.188  | 88.039  | 447.166  | 421.186  | 404.160  | 9  | C*     |     |
| 4      | E   | 594.209  | 487.182  | 486.198  | 532.204  | 515.177  | 514.193  | 550.214  | 549.230  | 102.055 | 594.234  | 568.255  | 551.238  | 8  | F      |     |
| 5      | A   | 575.246  | 558.219  | 557.235  | 603.241  | 586.214  | 585.230  | 621.251  | 620.267  | 44.040  | 722.329  | 696.350  | 679.323  | 7  | K      |     |
| 6      | E   | 704.289  | 687.262  | 686.278  | 732.284  | 715.257  | 714.273  | 750.294  | 749.310  | 102.055 | 851.372  | 825.392  | 806.366  | 6  | E      |     |
| 7      | K   | 832.384  | 815.357  | 814.373  | 860.378  | 843.352  | 842.368  | 878.389  | 877.405  | 101.107 | 922.409  | 896.429  | 879.403  | 5  | A      |     |
| 8      | F   | 979.452  | 962.425  | 961.441  | 1007.447 | 990.420  | 989.436  | 1025.457 | 1024.473 | 120.081 | 1051.451 | 1025.472 | 1008.446 | 4  | E      |     |
| 9      | C*  | 1139.483 | 1122.456 | 1121.472 | 1167.478 | 1150.451 | 1149.467 | 1185.488 | 1184.504 | 133.043 | 1166.478 | 1140.499 | 1123.472 | 3  | D      |     |
| 10     | N   | 1253.526 | 1236.499 | 1235.515 | 1281.520 | 1264.494 | 1263.510 | 1299.531 | 1298.547 | 87.055  | 1352.558 | 1326.578 | 1309.552 | 2  | W      |     |
| 11     | K   | 1381.621 | 1364.594 | 1363.610 | 1409.615 | 1392.589 | 1391.605 | 1427.626 | 1426.642 | 101.107 | 1453.605 | 1427.626 | 1410.599 | 1  | T      |     |

BioTools Version 3.2 Copyright © 1999-2008 Bruker Daltonik GmbH Page -2-



Area 8. Annotated MS/MS spectrum of ion 2161.931 m/z.

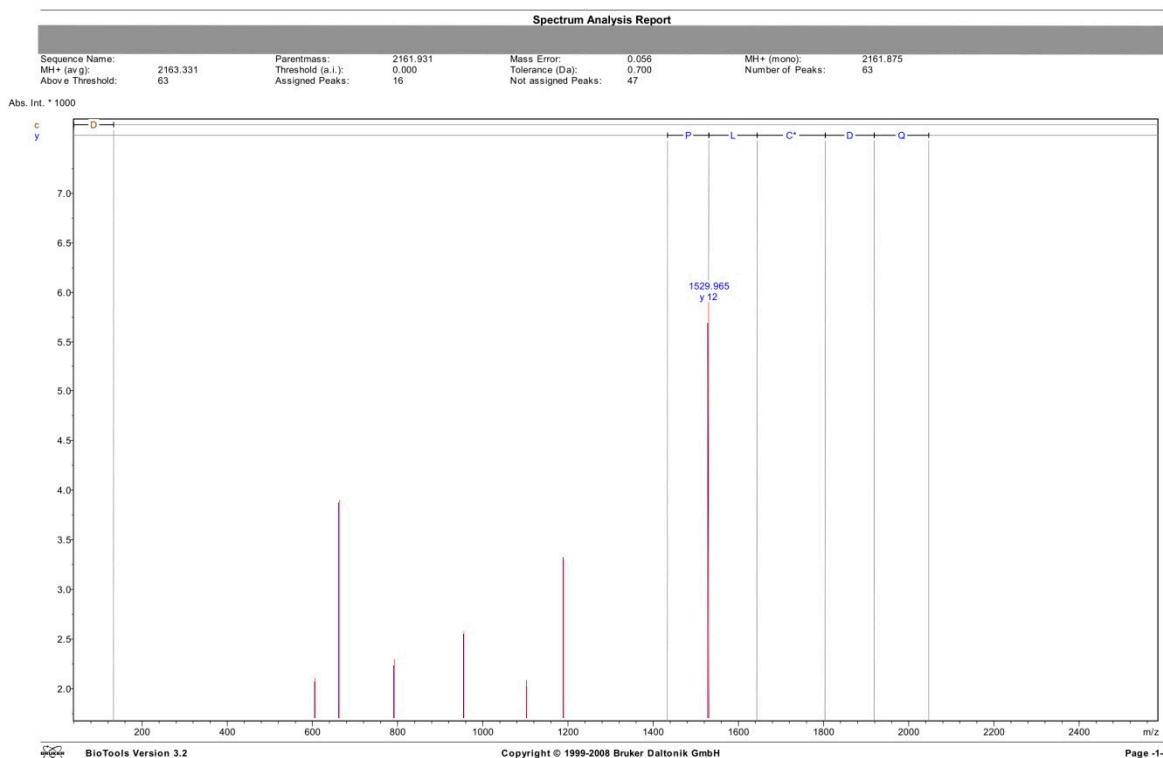

**Spectrum Analysis Report**

Display Parameter: Parentmass: 2161.931 Mass Error: 0.058 MH+ (mono): 2161.875 MH+ (avg): 2163.331  
 Threshold (a.i.): 0.000 Tolerance (Da): 0.700 Number of Peaks: 63 Above Threshold: 63  
 Assigned Peaks: 16 Not assigned Peaks: 47

**Peaklist:**

| Peak | Mass     | Intensity | Peak | Mass     | Intensity | Peak | Mass     | Intensity | Peak | Mass     | Intensity | Peak | Mass     | Intensity |
|------|----------|-----------|------|----------|-----------|------|----------|-----------|------|----------|-----------|------|----------|-----------|
| 1    | 109.605  | 626.436   | 2    | 132.536  | 137.798   | 3    | 135.542  | 162.113   | 4    | 158.539  | 221.837   | 5    | 174.501  | 135.132   |
| 6    | 194.497  | 198.137   | 7    | 243.407  | 320.094   | 8    | 273.397  | 147.820   | 9    | 275.369  | 188.177   | 10   | 295.390  | 228.011   |
| 11   | 297.356  | 392.571   | 12   | 312.420  | 309.383   | 13   | 323.400  | 198.923   | 14   | 340.391  | 376.965   | 15   | 354.334  | 376.134   |
| 16   | 358.345  | 471.687   | 17   | 370.350  | 151.504   | 18   | 375.353  | 151.838   | 19   | 409.388  | 244.396   | 20   | 427.353  | 770.350   |
| 21   | 455.335  | 186.501   | 22   | 469.354  | 994.361   | 23   | 483.342  | 227.173   | 24   | 518.281  | 733.369   | 25   | 540.350  | 455.766   |
| 26   | 544.396  | 1103.196  | 27   | 556.375  | 255.489   | 28   | 574.355  | 268.653   | 29   | 606.357  | 2110.621  | 30   | 628.358  | 248.575   |
| 31   | 631.331  | 544.615   | 32   | 646.323  | 330.303   | 33   | 663.366  | 3900.165  | 34   | 692.399  | 276.235   | 35   | 709.410  | 258.500   |
| 36   | 720.385  | 221.843   | 37   | 737.390  | 315.773   | 38   | 774.366  | 328.726   | 39   | 792.382  | 2295.266  | 40   | 866.429  | 492.133   |
| 41   | 923.499  | 345.449   | 42   | 955.478  | 2576.076  | 43   | 971.449  | 293.864   | 44   | 1032.610 | 481.495   | 45   | 1060.534 | 652.296   |
| 46   | 1102.586 | 2022.853  | 47   | 1171.870 | 247.966   | 48   | 1189.634 | 3295.237  | 49   | 1220.682 | 250.039   | 50   | 1375.803 | 733.720   |
| 51   | 1432.915 | 646.540   | 52   | 1511.970 | 374.945   | 53   | 1529.965 | 6902.089  | 54   | 1643.089 | 534.352   | 55   | 1692.100 | 424.519   |
| 56   | 1803.202 | 776.980   | 57   | 1918.457 | 325.597   | 58   | 2028.536 | 261.291   | 59   | 2033.605 | 398.088   | 60   | 2046.688 | 623.408   |
| 61   | 2056.964 | 222.040   | 62   | 2070.386 | 445.106   | 63   | 2101.251 | 258.569   |      |          |           |      |          |           |

**Calculated Masses:**  
 DODCLPGWSPYEGHCYK 4: Carbamidomethyl (C) 15: Carbamidomethyl (C)

| N-Term. | Ion | a        | a-17     | a-18     | b        | b-17     | b-18     | b+18     | c        | i       | x        | y        | z        | C-Term. | Ion |
|---------|-----|----------|----------|----------|----------|----------|----------|----------|----------|---------|----------|----------|----------|---------|-----|
| 1       | D   | 88.039   | 71.013   | 70.029   | 116.034  | 99.008   | 98.024   | 134.045  | 133.061  | 88.039  | 173.092  | 147.113  | 130.086  | 17      | K   |
| 2       | Q   | 216.098  | 199.071  | 198.087  | 244.093  | 227.066  | 226.082  | 262.103  | 261.119  | 101.071 | 336.155  | 310.176  | 293.150  | 16      | Y   |
| 3       | D   | 331.125  | 314.098  | 313.114  | 358.120  | 342.093  | 341.109  | 377.130  | 376.146  | 88.039  | 496.186  | 470.207  | 453.180  | 15      | C*  |
| 4       | C*  | 491.155  | 474.129  | 473.145  | 519.150  | 502.124  | 501.140  | 537.161  | 536.177  | 133.043 | 633.245  | 607.266  | 590.239  | 14      | H   |
| 5       | L   | 694.240  | 687.213  | 686.229  | 832.234  | 815.208  | 814.224  | 850.245  | 849.261  | 88.066  | 690.266  | 664.287  | 647.261  | 13      | G   |
| 6       | P   | 701.292  | 684.266  | 683.282  | 729.287  | 712.261  | 711.277  | 747.298  | 746.314  | 70.065  | 819.309  | 793.330  | 776.303  | 12      | E   |
| 7       | G   | 758.314  | 741.287  | 740.303  | 786.309  | 769.282  | 768.298  | 804.319  | 803.335  | 30.034  | 982.372  | 956.393  | 939.367  | 11      | Y   |
| 8       | W   | 944.393  | 927.367  | 926.383  | 972.388  | 955.361  | 954.377  | 990.399  | 989.415  | 159.092 | 1129.441 | 1103.461 | 1086.435 | 10      | F   |
| 9       | S   | 1031.425 | 1014.399 | 1013.415 | 1059.420 | 1042.393 | 1041.409 | 1077.431 | 1076.447 | 60.044  | 1216.473 | 1190.494 | 1173.467 | 9       | S   |
| 10      | F   | 1178.494 | 1161.467 | 1160.483 | 1206.488 | 1189.462 | 1188.478 | 1224.499 | 1223.515 | 120.081 | 1402.552 | 1376.573 | 1359.546 | 8       | W   |
| 11      | Y   | 1361.557 | 1344.530 | 1343.546 | 1389.552 | 1372.525 | 1371.541 | 1407.562 | 1406.578 | 136.076 | 1459.574 | 1433.594 | 1416.568 | 7       | G   |
| 12      | E   | 1470.599 | 1453.573 | 1452.589 | 1498.594 | 1481.568 | 1480.584 | 1516.605 | 1515.621 | 102.055 | 1556.626 | 1530.647 | 1513.621 | 6       | P   |
| 13      | G   | 1527.621 | 1510.594 | 1509.610 | 1555.616 | 1538.589 | 1537.605 | 1573.626 | 1572.642 | 30.034  | 1669.710 | 1643.731 | 1626.705 | 5       | L   |
| 14      | H   | 1664.680 | 1647.653 | 1646.669 | 1692.675 | 1675.648 | 1674.664 | 1710.685 | 1709.701 | 110.071 | 1829.741 | 1803.762 | 1786.735 | 4       | C*  |
| 15      | C*  | 1824.710 | 1807.684 | 1806.700 | 1852.705 | 1835.679 | 1834.695 | 1870.716 | 1869.732 | 133.043 | 1944.768 | 1918.789 | 1901.762 | 3       | D   |
| 16      | Y   | 1987.774 | 1970.747 | 1969.763 | 2015.769 | 1998.742 | 1997.758 | 2033.779 | 2032.795 | 136.076 | 2072.827 | 2046.847 | 2029.821 | 2       | Q   |
| 17      | K   | 2115.869 | 2098.842 | 2097.858 | 2143.864 | 2126.837 | 2125.853 | 2161.874 | 2160.890 | 101.107 | 2187.853 | 2161.874 | 2144.848 | 1       | D   |

Area 8. Annotated MS/MS spectrum of ion 1936.046 m/z.

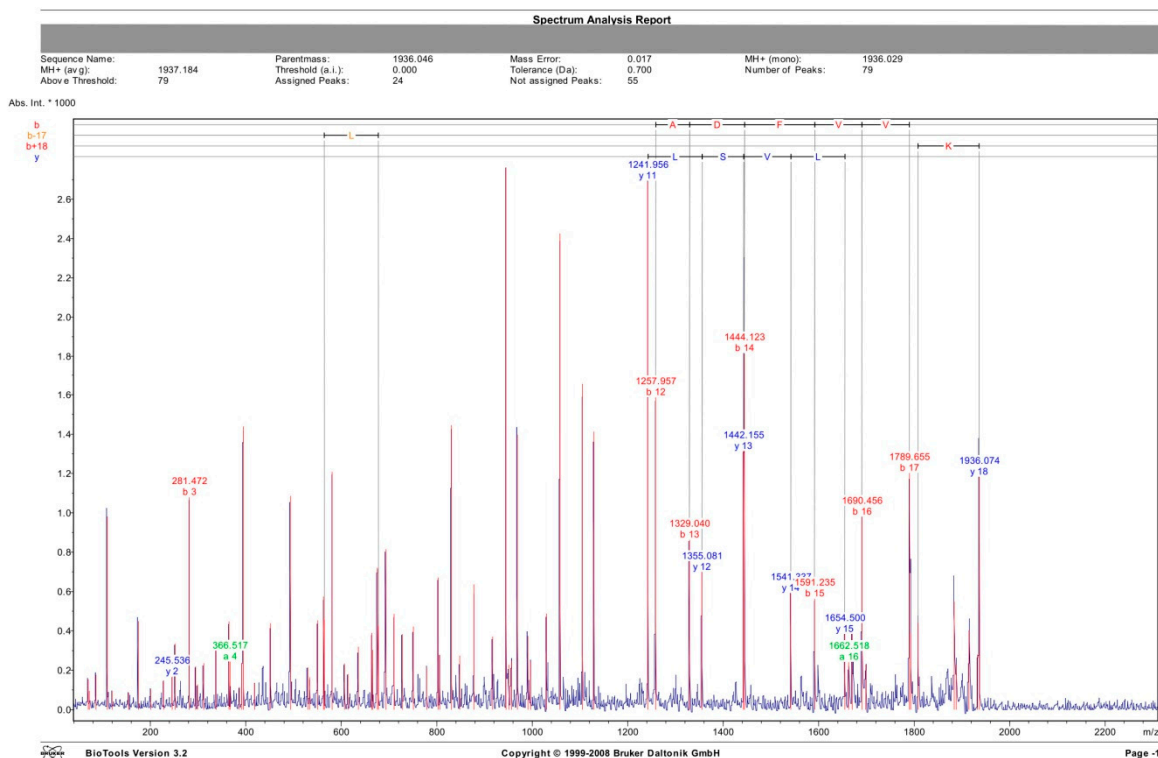

**Spectrum Analysis Report**

Display Parameter: Parentmass: 1936.046 Mass Error: 0.017 MH+ (mono): 1936.029 MH+ (avg): 1937.184  
 Threshold (a.i.): 0.000 Tolerance (Da): 0.700 Number of Peaks: 79 Above Threshold: 79  
 Assigned Peaks: 24 Not assigned Peaks: 55

**Peaklist:**

| Peak | Mass     | Intensity | Peak | Mass     | Intensity | Peak | Mass     | Intensity | Peak | Mass     | Intensity | Peak | Mass     | Intensity |
|------|----------|-----------|------|----------|-----------|------|----------|-----------|------|----------|-----------|------|----------|-----------|
| 1    | 69.677   | 154.820   | 2    | 71.696   | 95.671    | 3    | 85.696   | 176.250   | 4    | 109.621  | 981.962   | 5    | 119.626  | 94.850    |
| 6    | 154.564  | 87.186    | 7    | 174.657  | 456.011   | 8    | 200.504  | 194.328   | 9    | 227.550  | 148.959   | 10   | 245.536  | 167.856   |
| 11   | 251.501  | 336.381   | 12   | 281.472  | 1079.343  | 13   | 294.503  | 220.273   | 14   | 298.508  | 128.641   | 15   | 311.509  | 236.902   |
| 16   | 337.491  | 346.021   | 17   | 364.498  | 449.146   | 18   | 366.517  | 244.381   | 19   | 386.449  | 114.669   | 20   | 391.436  | 238.572   |
| 21   | 394.476  | 1439.606  | 22   | 418.481  | 134.276   | 23   | 451.474  | 439.732   | 24   | 483.500  | 1088.976  | 25   | 525.477  | 214.937   |
| 26   | 533.453  | 166.081   | 27   | 550.468  | 454.705   | 28   | 562.496  | 575.208   | 29   | 564.520  | 458.787   | 30   | 580.527  | 1209.039  |
| 31   | 606.470  | 235.204   | 32   | 613.460  | 181.354   | 33   | 635.528  | 319.868   | 34   | 663.529  | 390.557   | 35   | 666.576  | 303.880   |
| 36   | 675.578  | 721.667   | 37   | 677.590  | 428.300   | 38   | 693.568  | 816.350   | 39   | 710.521  | 487.196   | 40   | 727.544  | 384.830   |
| 41   | 750.530  | 423.310   | 42   | 778.512  | 212.332   | 43   | 802.534  | 671.223   | 44   | 805.857  | 278.654   | 45   | 830.626  | 1446.311  |
| 46   | 847.608  | 275.154   | 47   | 877.606  | 637.773   | 48   | 916.645  | 372.187   | 49   | 944.675  | 2861.350  | 50   | 950.678  | 228.988   |
| 51   | 956.615  | 248.936   | 52   | 968.699  | 1398.132  | 53   | 990.717  | 375.153   | 54   | 996.671  | 245.445   | 55   | 1029.621 | 488.316   |
| 56   | 1057.775 | 2428.612  | 57   | 1104.814 | 1655.506  | 58   | 1128.838 | 1413.678  | 59   | 1241.956 | 2694.034  | 60   | 1257.957 | 1586.885  |
| 61   | 1329.040 | 863.602   | 62   | 1355.081 | 699.442   | 63   | 1442.155 | 1313.748  | 64   | 1444.123 | 1816.136  | 65   | 1541.937 | 592.159   |
| 66   | 1591.235 | 564.368   | 67   | 1654.500 | 384.251   | 68   | 1662.518 | 242.214   | 69   | 1670.253 | 462.234   | 70   | 1690.456 | 979.883   |
| 71   | 1698.367 | 228.307   | 72   | 1789.655 | 1202.330  | 73   | 1792.824 | 389.558   | 74   | 1807.777 | 440.482   | 75   | 1883.748 | 549.109   |
| 76   | 1887.964 | 230.638   | 77   | 1914.725 | 403.868   | 78   | 1932.518 | 280.131   | 79   | 1936.074 | 1183.048  |      |          |           |

**Calculated Masses:**  
 GSHLVSLHNAEADFVVK

| N-Term | Ion | a        | a-17     | a-18     | b        | b-17     | b-18     | b+18     | c        | i       | x        | y        | z        | C-Term | Ion |
|--------|-----|----------|----------|----------|----------|----------|----------|----------|----------|---------|----------|----------|----------|--------|-----|
| 1      | G   | 30.034   | 13.067   | 12.023   | 58.029   | 41.002   | 40.018   | 76.039   | 75.055   | 30.034  | 173.092  | 147.113  | 130.086  | 18     | K   |
| 2      | S   | 117.066  | 100.039  | 99.055   | 145.061  | 128.034  | 127.050  | 183.071  | 182.087  | 80.044  | 272.160  | 246.181  | 228.155  | 17     | V   |
| 3      | H   | 254.125  | 237.098  | 236.114  | 282.120  | 265.093  | 264.109  | 300.130  | 299.146  | 110.071 | 371.229  | 345.250  | 328.223  | 16     | V   |
| 4      | L   | 367.209  | 350.182  | 349.198  | 395.204  | 378.177  | 377.193  | 413.214  | 412.230  | 86.096  | 518.297  | 492.318  | 475.291  | 15     | F   |
| 5      | V   | 466.277  | 449.251  | 448.267  | 494.272  | 477.246  | 476.262  | 512.283  | 511.299  | 72.081  | 633.324  | 607.345  | 590.318  | 14     | D   |
| 6      | S   | 553.309  | 536.283  | 535.299  | 581.304  | 564.278  | 563.294  | 599.315  | 598.331  | 60.044  | 704.361  | 678.382  | 661.356  | 13     | A   |
| 7      | L   | 666.393  | 649.367  | 648.383  | 694.398  | 677.362  | 676.378  | 712.399  | 711.415  | 86.096  | 833.404  | 807.425  | 790.398  | 12     | E   |
| 8      | H   | 803.452  | 786.426  | 785.442  | 831.447  | 814.421  | 813.437  | 849.458  | 848.474  | 110.071 | 904.441  | 878.462  | 861.435  | 11     | A   |
| 9      | N   | 917.495  | 900.469  | 899.485  | 945.490  | 928.464  | 927.480  | 963.501  | 962.517  | 87.055  | 1017.525 | 991.546  | 974.519  | 10     | I   |
| 10     | I   | 1030.579 | 1013.553 | 1012.569 | 1058.574 | 1041.548 | 1040.564 | 1076.585 | 1075.601 | 86.096  | 1131.568 | 1105.589 | 1088.562 | 9      | N   |
| 11     | A   | 1101.616 | 1084.590 | 1083.606 | 1129.611 | 1112.585 | 1111.601 | 1147.622 | 1146.638 | 44.049  | 1268.627 | 1242.648 | 1225.621 | 8      | H   |
| 12     | E   | 1230.659 | 1213.632 | 1212.648 | 1258.654 | 1241.627 | 1240.643 | 1276.664 | 1275.680 | 102.055 | 1381.711 | 1355.732 | 1338.705 | 7      | L   |
| 13     | A   | 1301.696 | 1284.670 | 1283.685 | 1329.691 | 1312.664 | 1311.680 | 1347.702 | 1346.718 | 44.049  | 1468.743 | 1442.764 | 1425.737 | 6      | S   |
| 14     | D   | 1416.723 | 1399.696 | 1398.712 | 1444.718 | 1427.691 | 1426.707 | 1462.728 | 1461.744 | 86.039  | 1567.811 | 1541.832 | 1524.806 | 5      | V   |
| 15     | F   | 1563.791 | 1546.765 | 1545.781 | 1591.786 | 1574.760 | 1573.776 | 1609.797 | 1608.813 | 120.081 | 1690.896 | 1664.916 | 1647.890 | 4      | L   |
| 16     | V   | 1662.860 | 1645.833 | 1644.849 | 1690.855 | 1673.828 | 1672.844 | 1708.865 | 1707.881 | 72.081  | 1817.954 | 1791.975 | 1774.949 | 3      | H   |
| 17     | V   | 1761.828 | 1744.802 | 1743.818 | 1789.823 | 1772.797 | 1771.813 | 1807.834 | 1806.850 | 72.081  | 1904.986 | 1879.007 | 1861.981 | 2      | S   |
| 18     | K   | 1880.823 | 1872.807 | 1872.813 | 1918.818 | 1900.802 | 1900.808 | 1936.829 | 1935.845 | 101.107 | 1962.908 | 1936.929 | 1919.902 | 1      | G   |

BioTools Version 3.2 Copyright © 1999-2008 Bruker Daltonik GmbH Page 2-



Area 8. Annotated MS/MS spectrum of ion 1041.686 m/z.

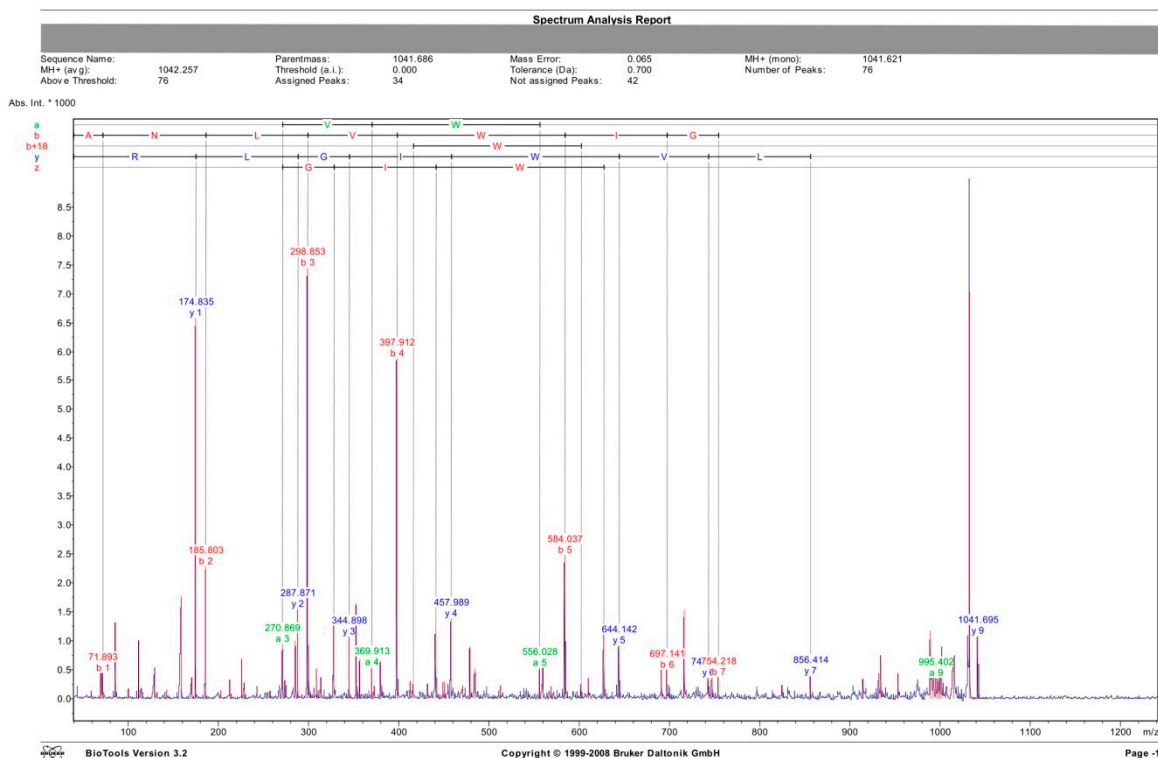

**Spectrum Analysis Report**

**Display Parameter:**

|                   |          |                     |       |                  |          |                  |          |
|-------------------|----------|---------------------|-------|------------------|----------|------------------|----------|
| Parentmass:       | 1041.686 | Mass Error:         | 0.065 | MH+ (mono):      | 1041.621 | MH+ (av g):      | 1042.257 |
| Threshold (a.i.): | 0.000    | Tolerance (Da):     | 0.700 | Number of Peaks: | 76       | Above Threshold: | 76       |
| Assigned Peaks:   | 34       | Not assigned Peaks: | 42    |                  |          |                  |          |

**Peaklist:**

| Peak | Mass     | Intensity | Peak | Mass     | Intensity | Peak | Mass     | Intensity | Peak | Mass     | Intensity | Peak | Mass     | Intensity |
|------|----------|-----------|------|----------|-----------|------|----------|-----------|------|----------|-----------|------|----------|-----------|
| 1    | 58.851   | 137.124   | 2    | 69.861   | 772.296   | 3    | 71.893   | 440.719   | 4    | 85.881   | 1314.254  | 5    | 100.829  | 181.268   |
| 6    | 111.846  | 1013.434  | 7    | 114.836  | 187.135   | 8    | 128.850  | 420.826   | 9    | 142.840  | 151.888   | 10   | 156.818  | 1771.833  |
| 11   | 170.830  | 373.724   | 12   | 174.835  | 6585.556  | 13   | 185.803  | 2284.423  | 14   | 202.809  | 145.292   | 15   | 212.827  | 333.168   |
| 16   | 225.844  | 700.579   | 17   | 228.836  | 286.895   | 18   | 242.816  | 220.258   | 19   | 257.856  | 135.627   | 20   | 270.869  | 944.086   |
| 21   | 274.096  | 327.064   | 22   | 284.887  | 1001.860  | 23   | 287.871  | 1548.303  | 24   | 298.853  | 7453.891  | 25   | 306.078  | 181.800   |
| 26   | 308.778  | 522.573   | 27   | 313.841  | 374.249   | 28   | 327.869  | 1353.794  | 29   | 344.898  | 1072.731  | 30   | 352.820  | 1651.589  |
| 31   | 356.873  | 694.235   | 32   | 369.913  | 544.382   | 33   | 373.154  | 210.924   | 34   | 379.870  | 657.014   | 35   | 397.912  | 5886.700  |
| 36   | 412.882  | 310.080   | 37   | 415.974  | 243.411   | 38   | 431.939  | 262.689   | 39   | 440.956  | 1193.208  | 40   | 448.940  | 297.970   |
| 41   | 450.948  | 287.952   | 42   | 457.989  | 1385.009  | 43   | 470.898  | 229.754   | 44   | 478.936  | 896.981   | 45   | 483.993  | 517.410   |
| 46   | 512.975  | 239.338   | 47   | 556.028  | 532.459   | 48   | 560.066  | 632.899   | 49   | 568.959  | 222.856   | 50   | 584.037  | 2475.207  |
| 51   | 602.110  | 267.289   | 52   | 610.055  | 369.013   | 53   | 627.061  | 1335.037  | 54   | 644.142  | 621.254   | 55   | 691.127  | 778.181   |
| 56   | 697.141  | 498.976   | 57   | 716.264  | 1532.698  | 58   | 743.293  | 361.975   | 59   | 747.243  | 430.272   | 60   | 754.218  | 370.382   |
| 61   | 825.240  | 239.468   | 62   | 856.414  | 390.818   | 63   | 914.701  | 350.344   | 64   | 932.336  | 410.942   | 65   | 934.262  | 662.807   |
| 66   | 953.572  | 449.540   | 67   | 989.090  | 1177.005  | 68   | 992.262  | 417.785   | 69   | 995.402  | 355.885   | 70   | 997.639  | 398.464   |
| 71   | 999.877  | 505.286   | 72   | 1001.870 | 754.990   | 73   | 1006.633 | 223.915   | 74   | 1015.057 | 720.047   | 75   | 1032.799 | 7038.152  |
| 76   | 1041.695 | 1083.408  |      |          |           |      |          |           |      |          |           |      |          |           |

**Calculated Masses:**  
ANLVWIGLR

| N-Term | Ion | a              | a-17           | a-18           | b              | b-17            | b-18           | b+18            | c              | l              | x              | y               | z              | C-Term | Ion |
|--------|-----|----------------|----------------|----------------|----------------|-----------------|----------------|-----------------|----------------|----------------|----------------|-----------------|----------------|--------|-----|
| 1      | A   | 44.049         | 27.023         | 26.039         | <b>72.044</b>  | 55.018          | 54.034         | 90.055          | 89.071         | 44.049         | 201.098        | <b>175.119</b>  | 158.092        | 9      | R   |
| 2      | N   | 158.092        | 141.066        | 140.082        | <b>186.087</b> | 169.061         | 168.077        | 204.098         | <b>203.114</b> | 87.051         | <b>314.182</b> | <b>288.203</b>  | 271.176        | 8      | L   |
| 3      | L   | <b>271.176</b> | 254.150        | 253.166        | <b>299.171</b> | 282.145         | 281.161        | 317.182         | 316.198        | <b>86.096</b>  | 371.204        | <b>345.224</b>  | <b>328.198</b> | 7      | G   |
| 4      | V   | <b>370.245</b> | <b>353.218</b> | <b>352.234</b> | <b>398.240</b> | 381.213         | <b>380.229</b> | <b>416.250</b>  | 415.266        | <b>72.081</b>  | <b>484.288</b> | <b>458.309</b>  | <b>441.282</b> | 6      | I   |
| 5      | W   | <b>586.224</b> | 539.298        | 538.314        | <b>594.319</b> | 567.293         | 566.309        | <b>602.338</b>  | 601.346        | <b>159.092</b> | 670.387        | <b>644.388</b>  | <b>627.361</b> | 5      | W   |
| 6      | I   | 689.408        | 652.382        | 651.398        | <b>697.403</b> | 680.377         | 679.393        | 715.414         | 714.430        | <b>86.096</b>  | 769.436        | <b>743.456</b>  | 726.430        | 4      | V   |
| 7      | G   | 726.430        | 709.403        | 708.419        | <b>754.425</b> | 737.398         | 736.414        | 772.435         | 771.451        | 30.034         | 862.520        | <b>856.540</b>  | 839.514        | 3      | L   |
| 8      | L   | 839.514        | 822.487        | 821.503        | 867.509        | 850.482         | 849.498        | 885.519         | 884.535        | <b>86.096</b>  | 996.563        | 970.553         | <b>953.557</b> | 2      | N   |
| 9      | R   | <b>995.615</b> | 978.588        | 977.604        | 1023.610       | <b>1006.583</b> | 1005.599       | <b>1041.620</b> | 1040.636       | <b>129.113</b> | 1067.600       | <b>1041.620</b> | 1024.594       | 1      | A   |

BioTools Version 3.2 Copyright © 1999-2008 Bruker Daltonik GmbH Page 2-

Area 9. Annotated MS/MS spectrum of ion 1533.641m/z.

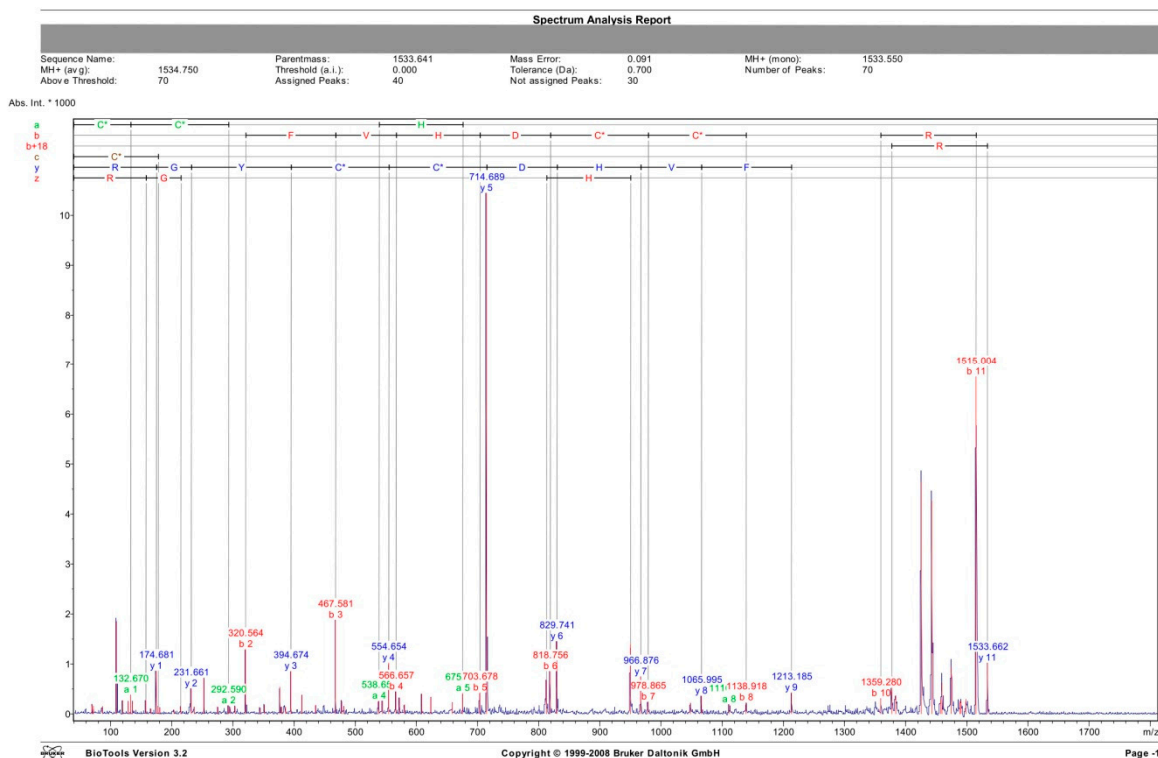

**Spectrum Analysis Report**

Display Parameter: Parentmass: 1533.641 Mass Error: 0.091 MH+ (mono): 1533.550 MH+ (avg): 1534.750  
 Threshold (a.i.): 0.000 Tolerance (Da): 0.700 Number of Peaks: 70 Above Threshold: 70  
 Assigned Peaks: 40 Not assigned Peaks: 30

**Peaklist:**

| Peak | Mass     | Intensity | Peak | Mass     | Intensity | Peak | Mass     | Intensity | Peak | Mass     | Intensity | Peak | Mass     | Intensity |
|------|----------|-----------|------|----------|-----------|------|----------|-----------|------|----------|-----------|------|----------|-----------|
| 1    | 69.759   | 184.457   | 2    | 71.774   | 164.499   | 3    | 86.754   | 159.733   | 4    | 109.711  | 1858.705  | 5    | 119.744  | 276.796   |
| 6    | 129.796  | 292.970   | 7    | 132.670  | 388.055   | 8    | 135.700  | 245.413   | 9    | 157.693  | 274.324   | 10   | 165.643  | 109.625   |
| 11   | 174.681  | 864.403   | 12   | 177.634  | 157.492   | 13   | 180.709  | 122.772   | 14   | 203.612  | 80.306    | 15   | 214.661  | 153.981   |
| 16   | 231.661  | 513.149   | 17   | 236.643  | 146.864   | 18   | 252.626  | 719.782   | 19   | 275.587  | 141.123   | 20   | 292.590  | 172.229   |
| 21   | 295.631  | 142.503   | 22   | 303.579  | 158.836   | 23   | 320.564  | 1295.980  | 24   | 344.613  | 126.182   | 25   | 351.674  | 186.977   |
| 26   | 376.598  | 546.027   | 27   | 379.650  | 147.150   | 28   | 386.017  | 149.093   | 29   | 394.674  | 858.297   | 30   | 412.566  | 382.739   |
| 31   | 435.544  | 182.326   | 32   | 467.581  | 1883.469  | 33   | 477.993  | 259.981   | 34   | 481.574  | 145.291   | 35   | 536.656  | 262.590   |
| 36   | 544.640  | 442.969   | 37   | 554.654  | 1029.054  | 38   | 566.667  | 450.838   | 39   | 572.633  | 327.638   | 40   | 580.528  | 191.364   |
| 41   | 608.649  | 407.815   | 42   | 623.664  | 343.345   | 43   | 658.690  | 229.026   | 44   | 675.676  | 420.223   | 45   | 703.678  | 429.796   |
| 46   | 714.689  | 10450.668 | 47   | 812.732  | 682.540   | 48   | 818.756  | 855.050   | 49   | 829.741  | 1455.148  | 50   | 948.835  | 1402.541  |
| 51   | 966.876  | 750.879   | 52   | 978.865  | 245.201   | 53   | 1047.807 | 229.734   | 54   | 1065.695 | 354.157   | 55   | 1110.971 | 138.414   |
| 56   | 1138.918 | 233.732   | 57   | 1213.185 | 430.765   | 58   | 1359.280 | 317.139   | 59   | 1377.288 | 526.091   | 60   | 1383.776 | 375.366   |
| 61   | 1425.305 | 4653.307  | 62   | 1442.458 | 4263.258  | 63   | 1487.065 | 280.733   | 64   | 1459.323 | 625.393   | 65   | 1474.514 | 952.622   |
| 66   | 1486.745 | 262.311   | 67   | 1490.638 | 257.867   | 68   | 1496.523 | 300.063   | 69   | 1515.004 | 6752.401  | 70   | 1533.662 | 1023.673  |

**Calculated Masses:**  
 GCFVHDCYGR 1: Carbamidomethyl (C) 2: Carbamidomethyl (C) 7: Carbamidomethyl (C) 8: Carbamidomethyl (C)

| N-Term. | Ion | a        | a-17     | a-18     | b        | b-17     | b-18     | b+18     | c        | i       | x        | y        | z        | C-Term. | Ion |
|---------|-----|----------|----------|----------|----------|----------|----------|----------|----------|---------|----------|----------|----------|---------|-----|
| 1       | C*  | 133.043  | 116.016  | 115.032  | 161.038  | 144.011  | 143.027  | 179.048  | 178.064  | 133.043 | 201.088  | 175.119  | 158.092  | 11      | R   |
| 2       | C*  | 293.074  | 276.047  | 275.063  | 321.069  | 304.042  | 303.058  | 339.079  | 338.095  | 133.043 | 258.120  | 232.140  | 215.114  | 10      | G   |
| 3       | F   | 440.142  | 423.116  | 422.132  | 468.137  | 451.110  | 450.126  | 486.148  | 485.164  | 120.081 | 421.183  | 395.204  | 378.177  | 9       | Y   |
| 4       | V   | 539.210  | 522.184  | 521.200  | 567.205  | 550.179  | 549.195  | 585.216  | 584.232  | 72.081  | 581.214  | 555.234  | 538.208  | 8       | C*  |
| 5       | H   | 676.269  | 659.243  | 658.259  | 704.264  | 687.238  | 686.254  | 722.275  | 721.291  | 110.071 | 741.244  | 715.265  | 698.239  | 7       | C*  |
| 6       | D   | 791.296  | 774.270  | 773.286  | 819.291  | 802.265  | 801.281  | 837.302  | 836.318  | 88.039  | 856.271  | 830.292  | 813.265  | 6       | D   |
| 7       | C*  | 951.327  | 934.300  | 933.316  | 979.322  | 962.295  | 961.311  | 997.332  | 996.348  | 133.043 | 993.330  | 967.351  | 950.324  | 5       | H   |
| 8       | C*  | 1111.358 | 1094.331 | 1093.347 | 1139.353 | 1122.326 | 1121.342 | 1157.363 | 1156.379 | 133.043 | 1092.399 | 1066.419 | 1049.393 | 4       | V   |
| 9       | Y   | 1274.421 | 1257.394 | 1256.410 | 1302.416 | 1285.389 | 1284.405 | 1320.426 | 1319.442 | 136.076 | 1239.467 | 1213.488 | 1196.461 | 3       | F   |
| 10      | G   | 1331.442 | 1314.416 | 1313.432 | 1359.437 | 1342.411 | 1341.427 | 1377.448 | 1376.464 | 30.034  | 1399.496 | 1373.518 | 1356.492 | 2       | C*  |
| 11      | R   | 1487.544 | 1470.517 | 1469.533 | 1515.538 | 1498.512 | 1497.528 | 1533.549 | 1532.565 | 129.113 | 1559.528 | 1533.549 | 1516.522 | 1       | C*  |

bioRxiv

BioTools Version 3.2 Copyright © 1999-2008 Bruker Daltonik GmbH Page 2-

### Area 9. Annotated MS spectrum.

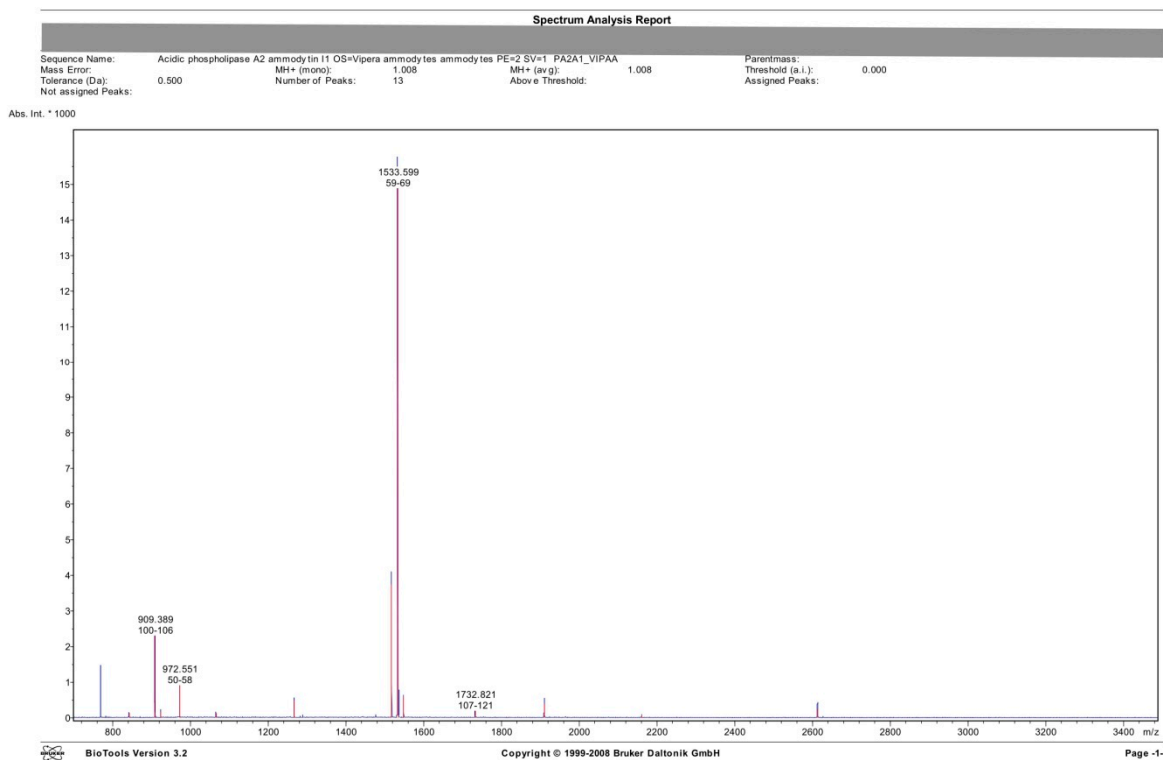

**Spectrum Analysis Report**

---

**Sequence data:**  
 Acidic phospholipase A2 ammodytin I1 OS=Vipera ammodyt tes ammodyt tes PE=2 SV=1 PAZA1\_VIPAA  
 Intensity Coverage: 75.4 % (18321 cnts) Sequence Coverage MS: 30.4%  
 Sequence Coverage MS/MS: 0.0% pl (isoelectric point): 4.9

|            |            |           |            |           |            |            |            |             |            |            |            |            |          |
|------------|------------|-----------|------------|-----------|------------|------------|------------|-------------|------------|------------|------------|------------|----------|
| 10         | 20         | 30        | 40         | 50        | 60         | 70         | 80         | 90          | 100        | 110        | 120        | 130        | 140      |
| MRILWIVAVC | LIGAECHLSQ | FGRINRKTG | IFGIRSYIYY | GTCYGRGGG | RPLDATERCC | FVMDCCYGRV | NGCDPKRQTY | SYSPFRGDIIV | CGGDDPCLRA | VCECPVVAAL | CFGENRNTYD | EKYRLTSLFD | CRKESEQC |

**Display Parameter:**  
 Sequence Name: Acidic phospholipase A2 ammodytin I1 OS=Vipera ammodyt tes ammodyt tes PE=2 SV=1 PAZA1\_VIPAA MH+ (mono): 1.008  
 MH+ (avg): 1.008 Threshold (a.i.): 0.000 Tolerance (Da): 0.500 Number of Peaks: 13

| Peak | Mass     | Intensity | Peak | Mass     | Intensity | Peak | Mass     | Intensity | Peak | Mass     | Intensity | Peak | Mass     | Intensity |
|------|----------|-----------|------|----------|-----------|------|----------|-----------|------|----------|-----------|------|----------|-----------|
| 1    | 842.539  | 140.884   | 2    | 909.389  | 2308.851  | 3    | 923.402  | 173.497   | 4    | 972.551  | 916.339   | 5    | 1066.457 | 139.805   |
| 6    | 1298.868 | 498.588   | 7    | 1518.890 | 3745.876  | 8    | 1533.599 | 14892.768 | 9    | 1547.618 | 583.526   | 10   | 1732.821 | 262.740   |
| 11   | 1909.862 | 393.958   | 12   | 2159.941 | 63.167    | 13   | 2613.122 | 255.339   |      |          |           |      |          |           |

BioTools Version 3.2 Copyright © 1999-2008 Bruker Daltonik GmbH Page -2-

### Area 10. Annotated MS spectrum.

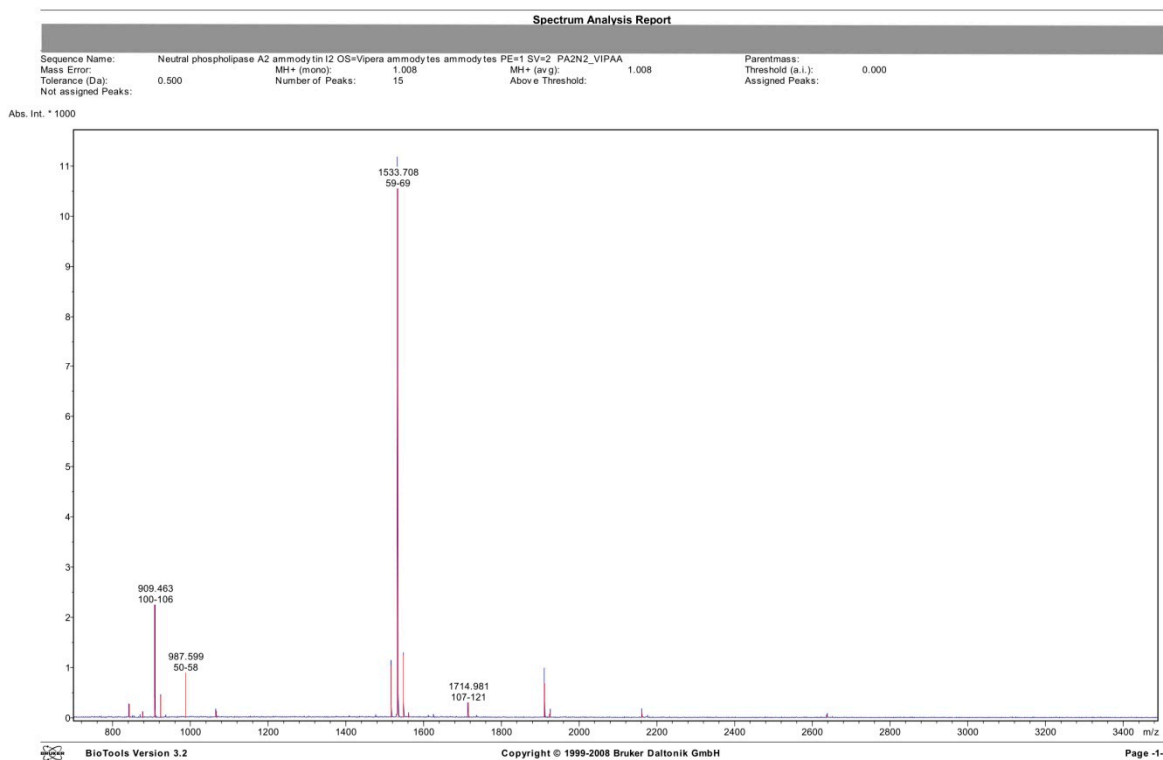

**Spectrum Analysis Report**

---

**Sequence data:**  
 Neutral phospholipase A2 ammodytin I2 OS=Vipera ammodytes ammodytes PE=1 SV=2 PA2N2\_VIPAA  
 Intensity Coverage: 76.5 % (14018 cnts) Sequence Coverage MS: 30.7%  
 Sequence Coverage MS/MS: 0.0% pl (isoelectric point): 6.1

|            |            |           |            |           |            |            |           |           |            |           |           |           |         |
|------------|------------|-----------|------------|-----------|------------|------------|-----------|-----------|------------|-----------|-----------|-----------|---------|
| 10         | 20         | 30        | 40         | 50        | 60         | 70         | 80        | 90        | 100        | 110       | 120       | 130       | 140     |
| MRTLVIVAVC | LIGVEGNLYQ | FGNIFKMTK | KSALLSYSNY | GTCYGRGGG | KPQDATERCC | FVMDCCYGRV | NGCDPLSIY | SYSFENGIV | CGGDDPCLRA | VCECPVAAL | CFGELNLYD | EKYKNTPSH | CTETECC |

**Display Parameter:**  
 Sequence Name: Neutral phospholipase A2 ammodytin I2 OS=Vipera ammodytes ammodytes PE=1 SV=2 PA2N2\_VIPAA MH+ (mono): 1.008  
 MH+ (avg): 1.008 Threshold (a.i.): 0.000 Tolerance (Da): 0.500 Number of Peaks: 15

| Peak | Mass     | Intensity | Peak | Mass     | Intensity | Peak | Mass     | Intensity | Peak | Mass     | Intensity | Peak | Mass     | Intensity |
|------|----------|-----------|------|----------|-----------|------|----------|-----------|------|----------|-----------|------|----------|-----------|
| 1    | 842.605  | 275.797   | 2    | 877.480  | 118.239   | 3    | 908.463  | 2253.037  | 4    | 923.479  | 438.802   | 5    | 987.599  | 901.986   |
| 6    | 1066.549 | 137.022   | 7    | 1518.673 | 1039.958  | 8    | 1533.708 | 10554.174 | 9    | 1547.728 | 1249.471  | 10   | 1561.741 | 84.402    |
| 11   | 1714.981 | 308.068   | 12   | 1910.983 | 693.719   | 13   | 1924.992 | 111.181   | 14   | 2161.090 | 108.325   | 15   | 2637.441 | 54.449    |

BioTools Version 3.2 Copyright © 1999-2008 Bruker Daltonik GmbH Page -2-

Area 11. Annotated MS/MS spectrum of ion 989.439 m/z.

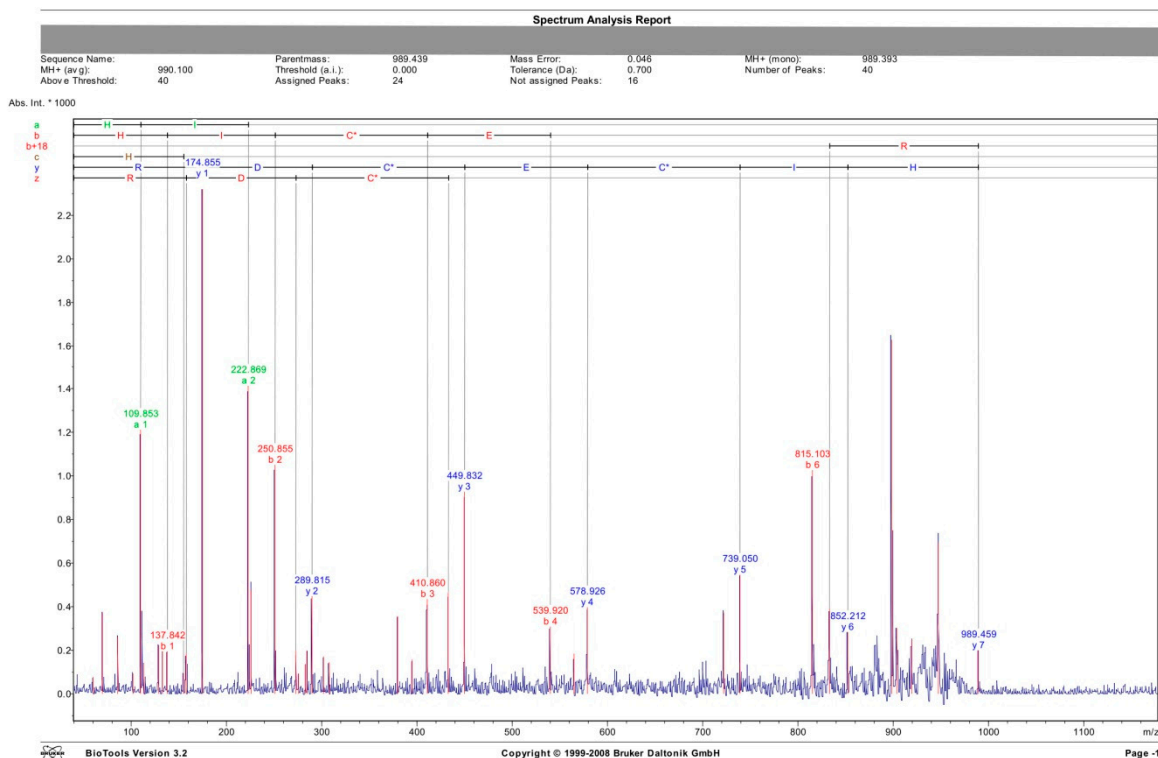

**Spectrum Analysis Report**

**Display Parameter:**

|                   |         |                     |       |                  |         |                  |         |
|-------------------|---------|---------------------|-------|------------------|---------|------------------|---------|
| Parentmass:       | 989.439 | Mass Error:         | 0.048 | MH+ (mono):      | 989.393 | MH+ (avg):       | 990.100 |
| Threshold (a.i.): | 0.000   | Tolerance (Da):     | 0.700 | Number of Peaks: | 40      | Above Threshold: | 40      |
| Assigned Peaks:   | 24      | Not assigned Peaks: | 16    |                  |         |                  |         |

**Peaklist:**

| Peak | Mass    | Intensity | Peak | Mass    | Intensity | Peak | Mass    | Intensity | Peak | Mass    | Intensity | Peak | Mass    | Intensity |
|------|---------|-----------|------|---------|-----------|------|---------|-----------|------|---------|-----------|------|---------|-----------|
| 1    | 59.899  | 77.496    | 2    | 69.899  | 370.617   | 3    | 85.903  | 280.132   | 4    | 101.839 | 94.743    | 5    | 109.853 | 1211.232  |
| 6    | 112.854 | 141.094   | 7    | 128.879 | 223.549   | 8    | 132.813 | 244.789   | 9    | 137.842 | 195.090   | 10   | 154.805 | 63.803    |
| 11   | 157.852 | 185.799   | 12   | 174.855 | 2369.797  | 13   | 222.869 | 1413.132  | 14   | 225.896 | 477.811   | 15   | 250.855 | 1050.164  |
| 16   | 272.809 | 198.924   | 17   | 275.785 | 93.526    | 18   | 282.863 | 137.328   | 19   | 284.859 | 198.474   | 20   | 289.815 | 448.011   |
| 21   | 301.866 | 171.788   | 22   | 307.820 | 146.634   | 23   | 379.859 | 396.316   | 24   | 394.897 | 157.520   | 25   | 410.860 | 434.687   |
| 26   | 432.836 | 464.084   | 27   | 449.832 | 926.776   | 28   | 539.920 | 308.317   | 29   | 564.891 | 184.573   | 30   | 578.926 | 397.446   |
| 31   | 722.010 | 371.777   | 32   | 739.050 | 548.438   | 33   | 815.103 | 1026.358  | 34   | 833.154 | 390.114   | 35   | 852.212 | 283.284   |
| 36   | 898.294 | 1628.348  | 37   | 903.826 | 302.778   | 38   | 919.449 | 247.021   | 39   | 947.485 | 692.258   | 40   | 989.459 | 199.990   |

**Calculated Masses:**  
HICECDR 3: Carbamidomethyl (C) 5: Carbamidomethyl (C)

| N-Term | Ion | a       | a-17    | a-18    | b       | b-17    | b-18    | b-18    | b+18    | c       | i        | x       | y       | z | C-Term | Ion |
|--------|-----|---------|---------|---------|---------|---------|---------|---------|---------|---------|----------|---------|---------|---|--------|-----|
| 1      | H   | 110.071 | 93.045  | 92.061  | 138.066 | 121.040 | 120.056 | 156.077 | 155.093 | 110.071 | 201.098  | 175.119 | 158.092 | 7 | R      |     |
| 2      | I   | 223.155 | 206.129 | 205.145 | 251.150 | 234.124 | 233.140 | 269.161 | 268.177 | 86.096  | 316.125  | 290.146 | 273.119 | 6 | D      |     |
| 3      | C*  | 383.186 | 366.159 | 365.175 | 411.181 | 394.154 | 393.170 | 429.191 | 428.207 | 133.043 | 476.156  | 450.177 | 433.150 | 5 | C*     |     |
| 4      | E   | 512.229 | 495.202 | 494.218 | 540.223 | 523.197 | 522.213 | 558.234 | 557.250 | 102.055 | 605.198  | 579.219 | 562.193 | 4 | E      |     |
| 5      | C*  | 672.259 | 655.233 | 654.249 | 700.254 | 683.228 | 682.244 | 718.265 | 717.281 | 133.043 | 765.229  | 739.250 | 722.223 | 3 | C*     |     |
| 6      | D   | 787.286 | 770.260 | 769.276 | 815.281 | 798.255 | 797.271 | 833.292 | 832.308 | 88.039  | 878.313  | 852.334 | 835.307 | 2 | I      |     |
| 7      | R   | 943.387 | 926.361 | 925.377 | 971.382 | 954.356 | 953.372 | 989.393 | 988.408 | 129.113 | 1015.372 | 989.393 | 972.366 | 1 | H      |     |

BioTools Version 3.2 Copyright © 1999-2008 Bruker Daltonik GmbH Page -2-

### Area 11. Annotated MS/MS spectrum of ion 2315.846 m/z.

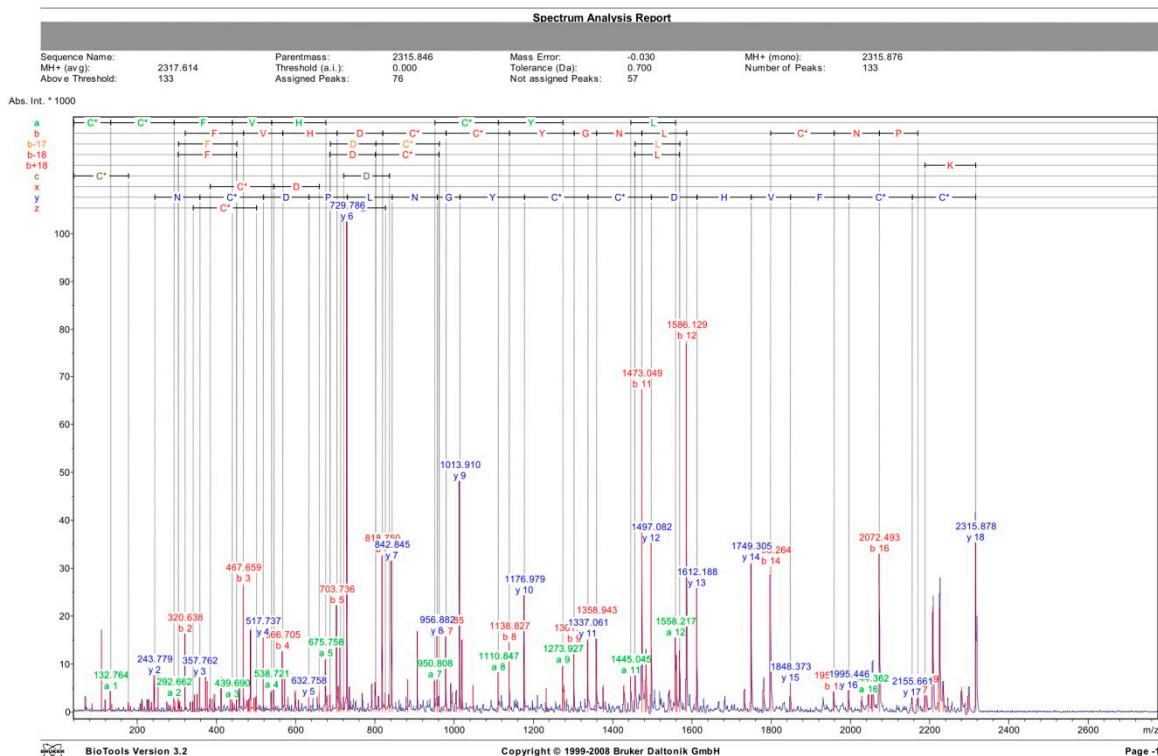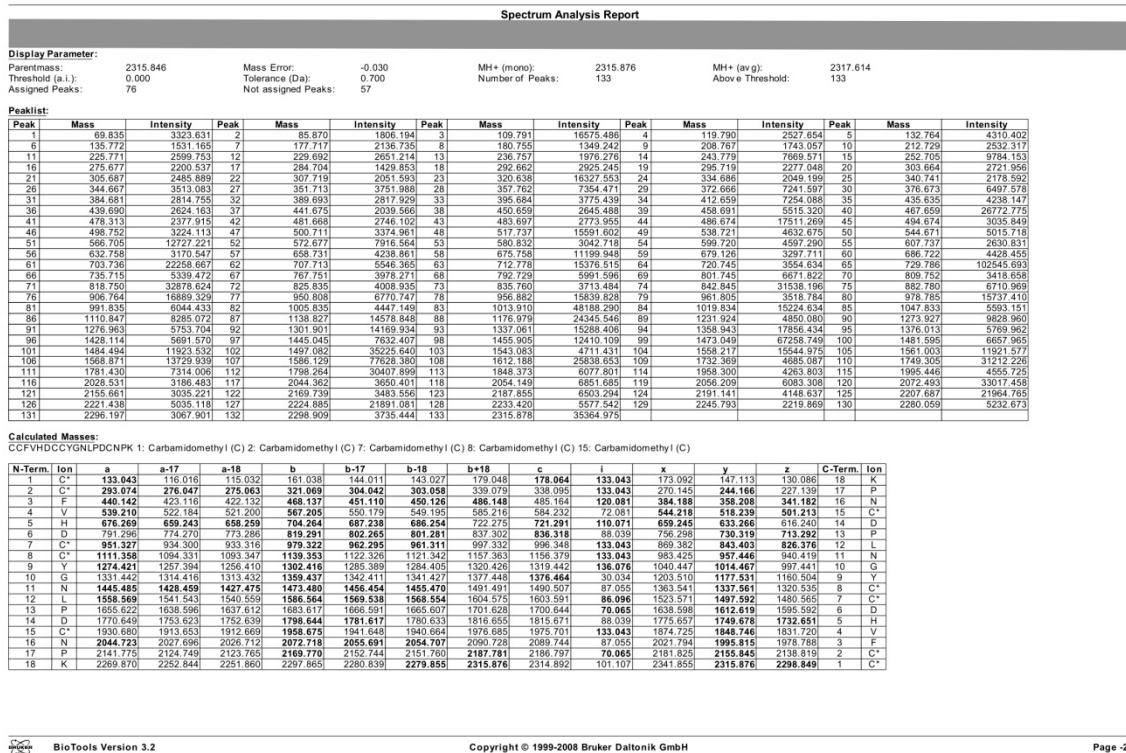

Area 11. Annotated MS/MS spectrum of ion 1105.502 m/z.

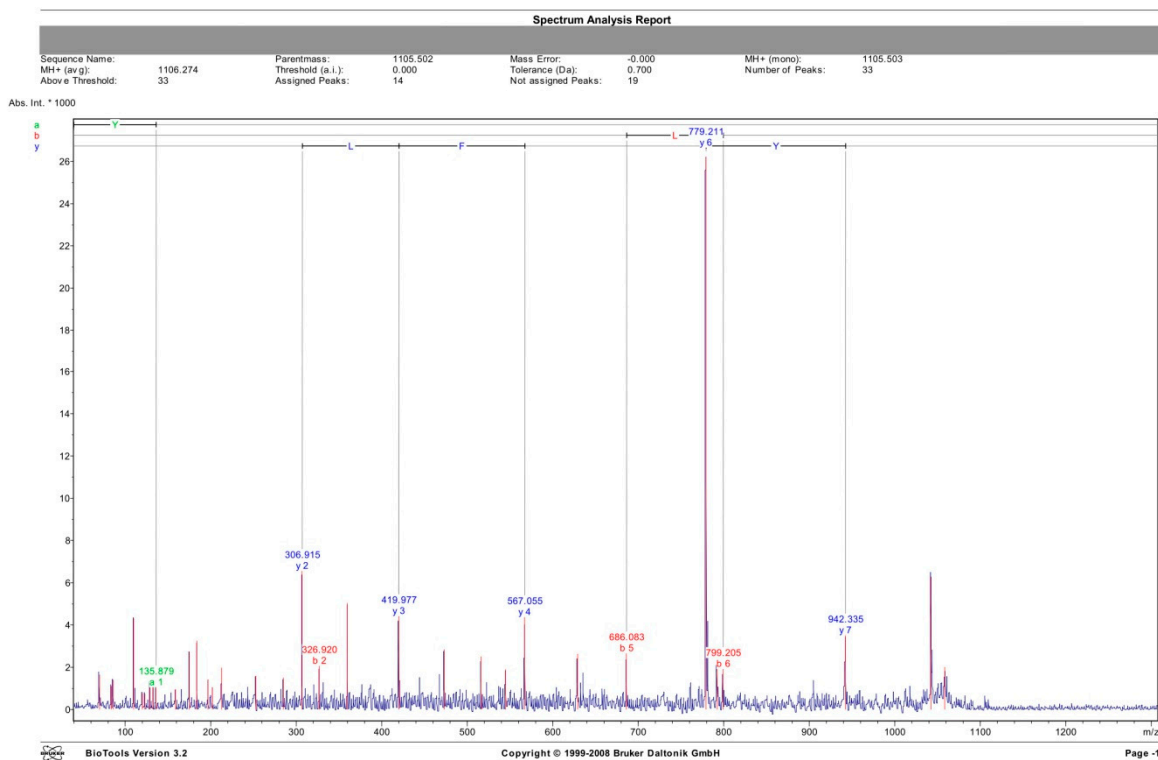

**Spectrum Analysis Report**

**Display Parameter:**

|                   |          |                     |        |                  |          |                  |          |
|-------------------|----------|---------------------|--------|------------------|----------|------------------|----------|
| Parentmass:       | 1105.502 | Mass Error:         | -0.000 | MH+ (mono):      | 1105.503 | MH+ (avg):       | 1106.274 |
| Threshold (a.i.): | 0.000    | Tolerance (Da):     | 0.700  | Number of Peaks: | 33       | Above Threshold: | 33       |
| Assigned Peaks:   | 14       | Not assigned Peaks: | 19     |                  |          |                  |          |

**Peaklist:**

| Peak | Mass    | Intensity | Peak | Mass     | Intensity | Peak | Mass     | Intensity | Peak | Mass    | Intensity | Peak | Mass    | Intensity |
|------|---------|-----------|------|----------|-----------|------|----------|-----------|------|---------|-----------|------|---------|-----------|
| 1    | 69.919  | 1652.840  | 2    | 83.910   | 1114.795  | 3    | 85.932   | 1406.645  | 4    | 109.890 | 4332.886  | 5    | 119.884 | 779.261   |
| 6    | 122.919 | 745.767   | 7    | 128.922  | 1318.721  | 8    | 132.873  | 1182.715  | 9    | 135.879 | 1052.849  | 10   | 158.889 | 967.837   |
| 11   | 174.916 | 2729.286  | 12   | 183.875  | 3255.213  | 13   | 196.916  | 1427.052  | 14   | 201.900 | 1054.820  | 15   | 212.877 | 1986.217  |
| 16   | 252.877 | 1604.988  | 17   | 284.948  | 1512.895  | 18   | 306.915  | 6554.001  | 19   | 326.920 | 2064.297  | 20   | 359.920 | 5037.013  |
| 21   | 419.977 | 4422.943  | 22   | 472.994  | 2947.974  | 23   | 518.006  | 2514.886  | 24   | 544.925 | 1804.235  | 25   | 567.055 | 4311.380  |
| 26   | 629.067 | 2639.973  | 27   | 686.083  | 2662.096  | 28   | 779.211  | 26648.386 | 29   | 792.151 | 2127.911  | 30   | 799.205 | 1922.823  |
| 31   | 942.335 | 3508.690  | 32   | 1042.608 | 6290.131  | 33   | 1058.448 | 2020.588  |      |         |           |      |         |           |

**Calculated Masses:**  
 YYPDFLCK 7: Carbamidomethyl (C)

| N-Term. | Ion | a        | a-17     | a-18     | b        | b-17     | b-18     | b+18     | c        | l       | x        | y        | z        | C-Term. | Ion |
|---------|-----|----------|----------|----------|----------|----------|----------|----------|----------|---------|----------|----------|----------|---------|-----|
| 1       | Y   | 136.076  | 119.049  | 118.065  | 164.071  | 147.044  | 146.060  | 182.081  | 181.097  | 136.076 | 173.092  | 147.113  | 130.086  | 8       | K   |
| 2       | Y   | 259.139  | 282.112  | 281.128  | 327.134  | 310.107  | 309.123  | 345.144  | 344.160  | 136.076 | 333.123  | 387.143  | 290.117  | 7       | C*  |
| 3       | P   | 396.192  | 379.165  | 378.181  | 424.187  | 407.160  | 406.176  | 442.197  | 441.213  | 70.065  | 446.207  | 426.228  | 403.201  | 6       | L   |
| 4       | D   | 511.219  | 494.192  | 493.208  | 539.214  | 522.187  | 521.203  | 557.224  | 556.240  | 88.039  | 593.275  | 567.296  | 550.269  | 5       | F   |
| 5       | F   | 658.287  | 641.261  | 640.277  | 686.282  | 669.256  | 668.271  | 704.293  | 703.309  | 120.081 | 738.302  | 682.323  | 665.296  | 4       | D   |
| 6       | L   | 771.371  | 754.345  | 753.361  | 799.366  | 782.340  | 781.356  | 817.377  | 816.393  | 86.096  | 805.355  | 779.376  | 762.349  | 3       | P   |
| 7       | C*  | 931.402  | 914.375  | 913.391  | 959.397  | 942.370  | 941.386  | 977.407  | 976.423  | 133.043 | 968.418  | 942.439  | 925.412  | 2       | Y   |
| 8       | K   | 1059.497 | 1042.470 | 1041.486 | 1087.492 | 1070.465 | 1069.481 | 1105.502 | 1104.518 | 101.107 | 1131.482 | 1105.502 | 1088.476 | 1       | Y   |

BioTools Version 3.2 Copyright © 1999-2008 Bruker Daltonik GmbH Page -2-



### Area 11. Annotated MS spectrum 1.

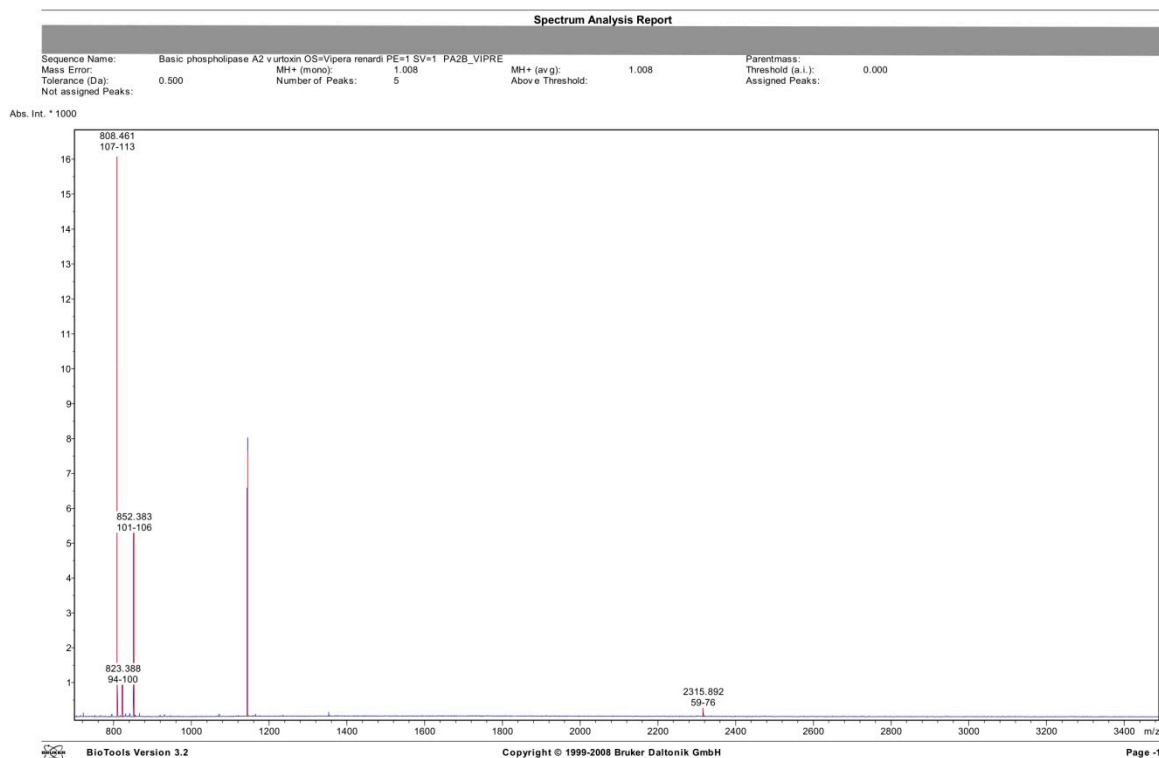

**Spectrum Analysis Report**

---

**Sequence data:**  
 Basic phospholipase A2 v urtoxin OS=Vipera renardi PE=1 SV=1 PA2B\_VIPRE  
 Intensity Coverage: 74.9 % (22721 cnts) Sequence Coverage MS: 27.5%  
 Sequence Coverage MS/MS: 0.0% pl (isoelectric point): 9.7

|            |             |            |            |            |            |            |            |           |            |           |            |           |          |
|------------|-------------|------------|------------|------------|------------|------------|------------|-----------|------------|-----------|------------|-----------|----------|
| 10         | 20          | 30         | 40         | 50         | 60         | 70         | 80         | 90        | 100        | 110       | 120        | 130       | 140      |
| MRTLWIVAVC | LIVGEGSLLLE | FORHILEETG | RNPLTSYSFY | GTCYGVGGEG | TPKDATDRCC | FVMDCCYGNL | PBCNPKIDRY | KYHRKGAIV | CGRQTSCENR | ICECPAAAL | CFRKNLRTYN | HIKYYPDFL | CKKESEKC |

**Display Parameter:**  
 Sequence Name: Basic phospholipase A2 v urtoxin OS=Vipera renardi PE=1 SV=1 PA2B\_VIPRE MH+ (mono): 1.008  
 MH+ (avg): 1.008 Threshold (a.i.): 0.000 Tolerance (Da): 0.500 MH+ (mono): 1.008  
 Number of Peaks: 5

**Peaklist:**

| Peak | Mass    | Intensity | Peak | Mass    | Intensity | Peak | Mass    | Intensity | Peak | Mass     | Intensity | Peak | Mass     | Intensity |
|------|---------|-----------|------|---------|-----------|------|---------|-----------|------|----------|-----------|------|----------|-----------|
| 1    | 808.461 | 16204.710 | 2    | 823.388 | 942.130   | 3    | 852.383 | 5297.561  | 4    | 1144.657 | 7632.483  | 5    | 2315.892 | 276.539   |

BioTools Version 3.2 Copyright © 1999-2008 Bruker Daltonik GmbH Page -2-

### Annotated MS/MS spectrum of peptide 1072.570 m/z.

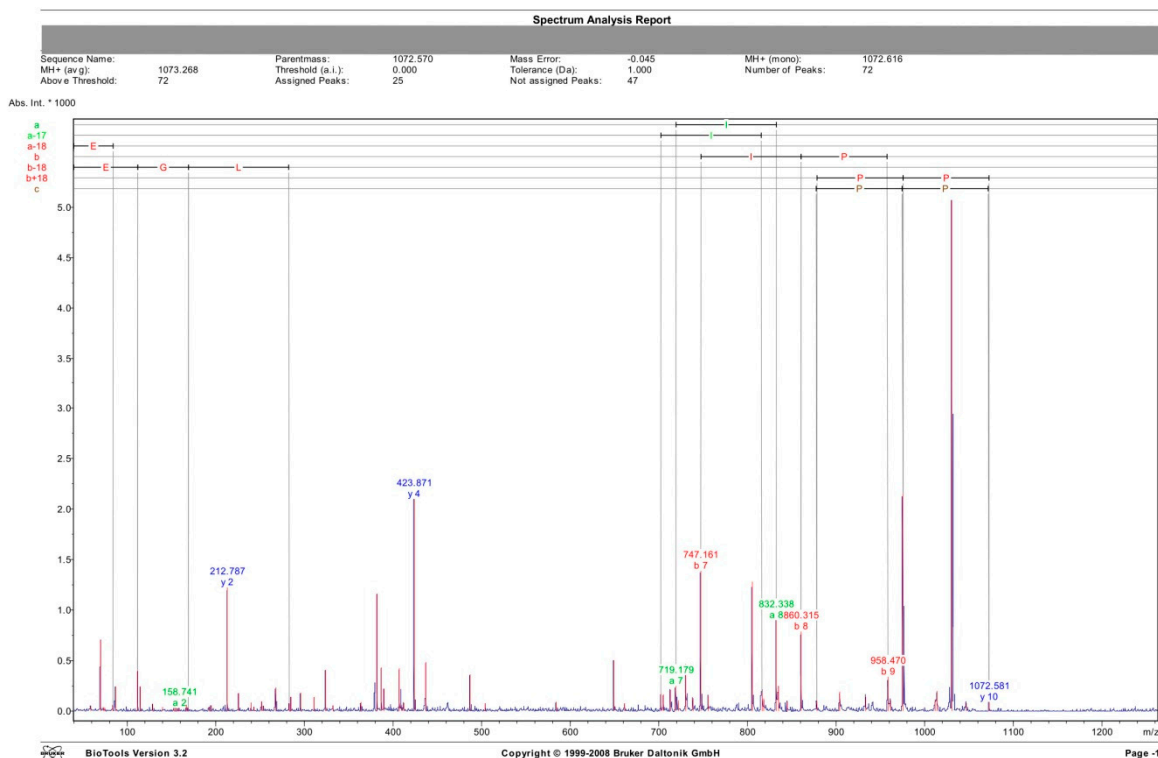

**Spectrum Analysis Report**

|                    |                   |          |                     |        |                  |          |                  |          |
|--------------------|-------------------|----------|---------------------|--------|------------------|----------|------------------|----------|
| Display Parameter: | Parentmass:       | 1072.570 | Mass Error:         | -0.045 | MH+ (mono):      | 1072.616 | MH+ (avg):       | 1073.268 |
|                    | Threshold (a.i.): | 0.000    | Tolerance (Da):     | 1.000  | Number of Peaks: | 72       | Above Threshold: | 72       |
|                    | Assigned Peaks:   | 25       | Not assigned Peaks: | 47     |                  |          |                  |          |

**Peaklist:**

| Peak | Mass     | Intensity | Peak | Mass     | Intensity | Peak | Mass     | Intensity | Peak | Mass     | Intensity | Peak | Mass     | Intensity |
|------|----------|-----------|------|----------|-----------|------|----------|-----------|------|----------|-----------|------|----------|-----------|
| 1    | 58.804   | 54.030    | 2    | 69.839   | 706.327   | 3    | 72.860   | 36.175    | 4    | 74.464   | 36.691    | 5    | 83.811   | 57.810    |
| 6    | 86.841   | 244.965   | 7    | 111.814  | 400.346   | 8    | 114.805  | 244.389   | 9    | 128.812  | 70.708    | 10   | 138.787  | 38.876    |
| 11   | 152.753  | 31.544    | 12   | 154.738  | 39.733    | 13   | 156.788  | 27.874    | 14   | 158.741  | 30.524    | 15   | 166.817  | 63.399    |
| 16   | 168.807  | 36.753    | 17   | 192.772  | 41.137    | 18   | 194.798  | 57.016    | 19   | 212.787  | 1224.182  | 20   | 225.804  | 177.360   |
| 21   | 239.782  | 84.221    | 22   | 242.871  | 41.094    | 23   | 251.784  | 98.501    | 24   | 253.788  | 50.710    | 25   | 267.788  | 235.839   |
| 26   | 282.844  | 77.055    | 27   | 284.803  | 140.101   | 28   | 295.811  | 182.333   | 29   | 310.831  | 141.388   | 30   | 323.800  | 407.748   |
| 31   | 332.556  | 57.669    | 32   | 363.875  | 90.283    | 33   | 381.859  | 1180.679  | 34   | 386.577  | 433.045   | 35   | 388.830  | 220.190   |
| 36   | 406.855  | 428.061   | 37   | 409.834  | 81.784    | 38   | 412.115  | 81.432    | 39   | 423.871  | 2098.975  | 40   | 436.890  | 488.695   |
| 41   | 486.911  | 363.486   | 42   | 503.899  | 79.299    | 43   | 584.014  | 92.371    | 44   | 649.080  | 504.030   | 45   | 661.140  | 78.668    |
| 46   | 702.173  | 174.050   | 47   | 705.057  | 166.669   | 48   | 713.174  | 211.742   | 49   | 719.179  | 249.012   | 50   | 721.982  | 107.020   |
| 51   | 730.159  | 486.318   | 52   | 738.556  | 129.187   | 53   | 747.161  | 1389.334  | 54   | 755.542  | 161.062   | 55   | 805.274  | 1281.351  |
| 56   | 816.301  | 192.431   | 57   | 818.061  | 125.222   | 58   | 832.338  | 899.077   | 59   | 834.916  | 240.836   | 60   | 844.849  | 99.838    |
| 61   | 860.315  | 788.382   | 62   | 878.328  | 101.207   | 63   | 903.880  | 192.609   | 64   | 933.449  | 141.219   | 65   | 958.470  | 340.228   |
| 66   | 981.521  | 108.111   | 67   | 975.477  | 2152.227  | 68   | 1011.579 | 115.466   | 69   | 1013.666 | 201.953   | 70   | 1030.623 | 5318.954  |
| 71   | 1046.841 | 77.855    | 72   | 1072.581 | 90.239    |      |          |           |      |          |           |      |          |           |

**Calculated Masses:**  
EGLPPRPPIP

| N-Term | Ion | a              | a-17           | a-18           | b              | b-17           | b-18           | b+18            | c               | i              | x              | y               | z              | C-Term | Ion |
|--------|-----|----------------|----------------|----------------|----------------|----------------|----------------|-----------------|-----------------|----------------|----------------|-----------------|----------------|--------|-----|
| 1      | E   | 102.055        | 85.028         | <b>84.044</b>  | 130.050        | 113.023        | <b>112.039</b> | 148.060         | 147.076         | 102.055        | 142.050        | 116.071         | 99.044         | 0      | P   |
| 2      | G   | <b>189.076</b> | 142.050        | 141.066        | 187.071        | 170.045        | <b>169.061</b> | 205.082         | 204.098         | 30.034         | <b>239.103</b> | <b>213.123</b>  | 196.097        | 9      | P   |
| 3      | L   | 272.150        | 255.134        | <b>254.150</b> | 300.155        | <b>283.129</b> | <b>282.145</b> | 318.166         | 317.182         | <b>86.096</b>  | 352.187        | 328.207         | 309.181        | 8      | I   |
| 4      | P   | 369.213        | 352.187        | 351.203        | 397.208        | 380.182        | 379.198        | 415.219         | 414.235         | <b>70.065</b>  | 449.239        | <b>423.260</b>  | <b>406.234</b> | 7      | P   |
| 5      | P   | 466.266        | 449.239        | 448.255        | 494.261        | 477.234        | 476.250        | 512.271         | 511.287         | <b>70.065</b>  | 605.341        | 579.361         | 562.335        | 6      | R   |
| 6      | R   | 622.307        | 605.341        | 604.357        | 650.382        | 633.355        | 632.351        | 668.373         | 667.389         | <b>129.113</b> | <b>702.393</b> | 676.414         | 659.388        | 5      | P   |
| 7      | P   | <b>719.420</b> | <b>702.393</b> | <b>701.409</b> | <b>747.415</b> | <b>730.388</b> | <b>729.404</b> | 765.425         | 764.441         | <b>70.065</b>  | 799.446        | 773.467         | <b>756.440</b> | 4      | P   |
| 8      | I   | <b>832.564</b> | <b>815.477</b> | 814.493        | <b>860.499</b> | 843.472        | 842.488        | <b>878.509</b>  | <b>877.525</b>  | <b>86.096</b>  | 912.530        | 886.551         | 869.524        | 3      | L   |
| 9      | P   | 929.537        | 912.530        | 911.546        | <b>957.552</b> | 940.525        | 939.541        | <b>975.562</b>  | <b>974.578</b>  | <b>70.065</b>  | 989.552        | 943.572         | 925.546        | 2      | G   |
| 10     | P   | 1026.609       | 1009.583       | 1008.599       | 1054.604       | 1037.578       | 1036.594       | <b>1072.615</b> | <b>1071.631</b> | <b>70.065</b>  | 1098.594       | <b>1072.615</b> | 1055.588       | 1      | E   |

BioTools Version 3.2 Copyright © 1999-2008 Bruker Daltonik GmbH Page -2-

Annotated MS/MS spectrum of peptide 1144.620 m/z.

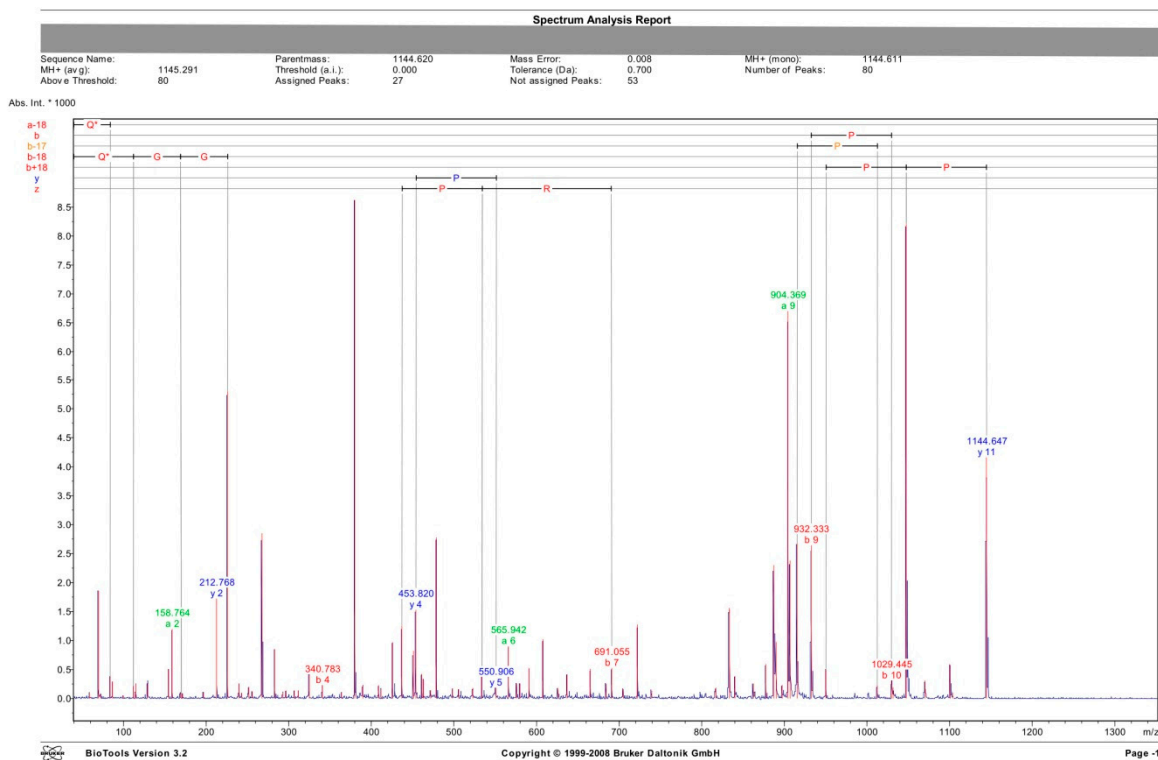

**Spectrum Analysis Report**

**Display Parameter:** Parentmass: 1144.620 Mass Error: 0.008 MH+ (mono): 1144.611 MH+ (avg): 1145.291  
 Threshold (a.i.): 0.000 Tolerance (Da): 0.700 Number of Peaks: 80  
 Assigned Peaks: 27 Not assigned Peaks: 53 Above Threshold: 80

**Peaklist:**

| Peak | Mass     | Intensity | Peak | Mass     | Intensity | Peak | Mass     | Intensity | Peak | Mass     | Intensity | Peak | Mass     | Intensity |
|------|----------|-----------|------|----------|-----------|------|----------|-----------|------|----------|-----------|------|----------|-----------|
| 1    | 58.791   | 103.476   | 2    | 69.819   | 1860.238  | 3    | 72.822   | 80.027    | 4    | 83.814   | 381.228   | 5    | 86.826   | 291.511   |
| 6    | 99.817   | 51.066    | 7    | 111.799  | 209.413   | 8    | 114.788  | 260.626   | 9    | 128.786  | 258.306   | 10   | 154.750  | 658.488   |
| 11   | 158.764  | 1197.544  | 12   | 169.747  | 105.671   | 13   | 171.767  | 88.021    | 14   | 196.780  | 113.379   | 15   | 212.768  | 1724.577  |
| 16   | 225.796  | 5302.895  | 17   | 239.767  | 283.537   | 18   | 243.028  | 100.978   | 19   | 251.772  | 203.776   | 20   | 256.796  | 119.537   |
| 21   | 287.766  | 2850.168  | 22   | 282.788  | 855.307   | 23   | 292.807  | 109.182   | 24   | 296.844  | 138.884   | 25   | 306.823  | 137.075   |
| 26   | 311.801  | 140.826   | 27   | 324.824  | 431.749   | 28   | 340.783  | 228.519   | 29   | 363.855  | 114.328   | 30   | 379.843  | 8676.980  |
| 31   | 389.894  | 222.945   | 32   | 408.803  | 229.889   | 33   | 411.823  | 164.109   | 34   | 425.847  | 973.333   | 35   | 436.812  | 1254.270  |
| 36   | 450.939  | 821.932   | 37   | 453.820  | 1531.078  | 38   | 460.908  | 426.047   | 39   | 463.024  | 324.146   | 40   | 471.818  | 144.241   |
| 41   | 478.916  | 2779.339  | 42   | 498.421  | 175.671   | 43   | 505.906  | 158.235   | 44   | 522.949  | 182.777   | 45   | 533.891  | 444.683   |
| 46   | 550.908  | 185.526   | 47   | 565.942  | 903.974   | 48   | 576.008  | 263.444   | 49   | 579.968  | 260.246   | 50   | 590.905  | 526.665   |
| 51   | 607.946  | 1022.627  | 52   | 625.970  | 183.899   | 53   | 637.056  | 417.223   | 54   | 665.045  | 511.490   | 55   | 684.305  | 252.554   |
| 56   | 691.055  | 526.389   | 57   | 705.090  | 169.210   | 58   | 722.107  | 1279.763  | 59   | 739.311  | 138.043   | 60   | 817.205  | 187.382   |
| 61   | 833.234  | 1565.577  | 62   | 840.072  | 387.379   | 63   | 862.288  | 261.169   | 64   | 877.262  | 596.878   | 65   | 887.318  | 2302.499  |
| 66   | 889.968  | 975.334   | 67   | 897.289  | 234.537   | 68   | 904.369  | 6705.468  | 69   | 908.895  | 2382.668  | 70   | 915.286  | 2672.872  |
| 71   | 932.333  | 2644.201  | 72   | 950.359  | 496.575   | 73   | 1012.407 | 220.651   | 74   | 1029.445 | 309.359   | 75   | 1031.628 | 195.551   |
| 76   | 1047.507 | 8209.386  | 77   | 1070.114 | 309.290   | 78   | 1100.624 | 578.195   | 79   | 1103.675 | 103.328   | 80   | 1144.647 | 4160.337  |

**Calculated Masses:**  
 OGGPPRPQIPP 1: Deamidated (NQ)

| N-Term | Ion            | a              | a-17           | a-18          | b               | b-17            | b-18           | b+18            | c        | i              | x              | y               | z              | C-Term | Ion            |
|--------|----------------|----------------|----------------|---------------|-----------------|-----------------|----------------|-----------------|----------|----------------|----------------|-----------------|----------------|--------|----------------|
| 1      | G <sup>+</sup> | 102.055        | 85.028         | <b>84.044</b> | 130.050         | 113.023         | <b>112.039</b> | 148.060         | 147.078  | 102.055        | 142.050        | 116.071         | 99.044         | 11     | P <sup>-</sup> |
| 2      | G              | <b>158.676</b> | 142.050        | 141.068       | 187.071         | <b>178.045</b>  | 169.061        | 205.082         | 204.098  | 30.034         | <b>239.183</b> | <b>213.123</b>  | <b>196.097</b> | 10     | P              |
| 3      | G              | 216.098        | 199.071        | 198.087       | 244.093         | 227.066         | <b>226.082</b> | 262.103         | 261.119  | 30.034         | 352.187        | 326.207         | 309.181        | 9      | I              |
| 4      | P              | 313.151        | 296.124        | 295.140       | <b>341.146</b>  | 324.119         | 323.135        | 359.156         | 358.172  | <b>70.065</b>  | 480.245        | <b>454.266</b>  | <b>437.239</b> | 8      | Q              |
| 5      | P              | 410.203        | 393.177        | 392.193       | 438.198         | 421.172         | 420.188        | 456.209         | 455.225  | <b>70.065</b>  | 577.298        | <b>551.319</b>  | <b>534.292</b> | 7      | P              |
| 6      | R              | <b>566.305</b> | 549.278        | 548.294       | 594.299         | 577.273         | <b>576.289</b> | 612.310         | 611.326  | <b>129.113</b> | 733.399        | 707.420         | <b>690.393</b> | 6      | R              |
| 7      | P              | 663.357        | 646.331        | 645.347       | <b>691.352</b>  | 674.326         | 673.342        | 709.363         | 708.379  | <b>70.065</b>  | 830.452        | 804.473         | 787.446        | 5      | P              |
| 8      | Q              | 751.416        | 734.390        | 733.405       | 819.411         | 802.384         | 801.400        | 837.421         | 836.437  | 101.071        | 927.505        | 901.526         | 884.499        | 4      | P              |
| 9      | I              | <b>904.500</b> | <b>887.473</b> | 886.489       | <b>932.495</b>  | <b>915.468</b>  | 914.484        | <b>950.505</b>  | 949.521  | 86.096         | 984.526        | 958.547         | 941.520        | 3      | G              |
| 10     | P              | 1001.553       | 984.526        | 983.542       | <b>1029.548</b> | <b>1012.521</b> | 1011.537       | <b>1047.558</b> | 1046.574 | <b>70.065</b>  | 1041.548       | 1015.568        | 998.542        | 2      | G              |
| 11     | P              | 1098.605       | 1081.579       | 1080.595      | 1126.600        | 1109.574        | 1108.590       | <b>1144.611</b> | 1143.627 | <b>70.065</b>  | 1170.590       | <b>1144.611</b> | 1127.584       | 1      | Q <sup>+</sup> |

Annotated MS/MS spectrum of peptide 1166.597 m/z.

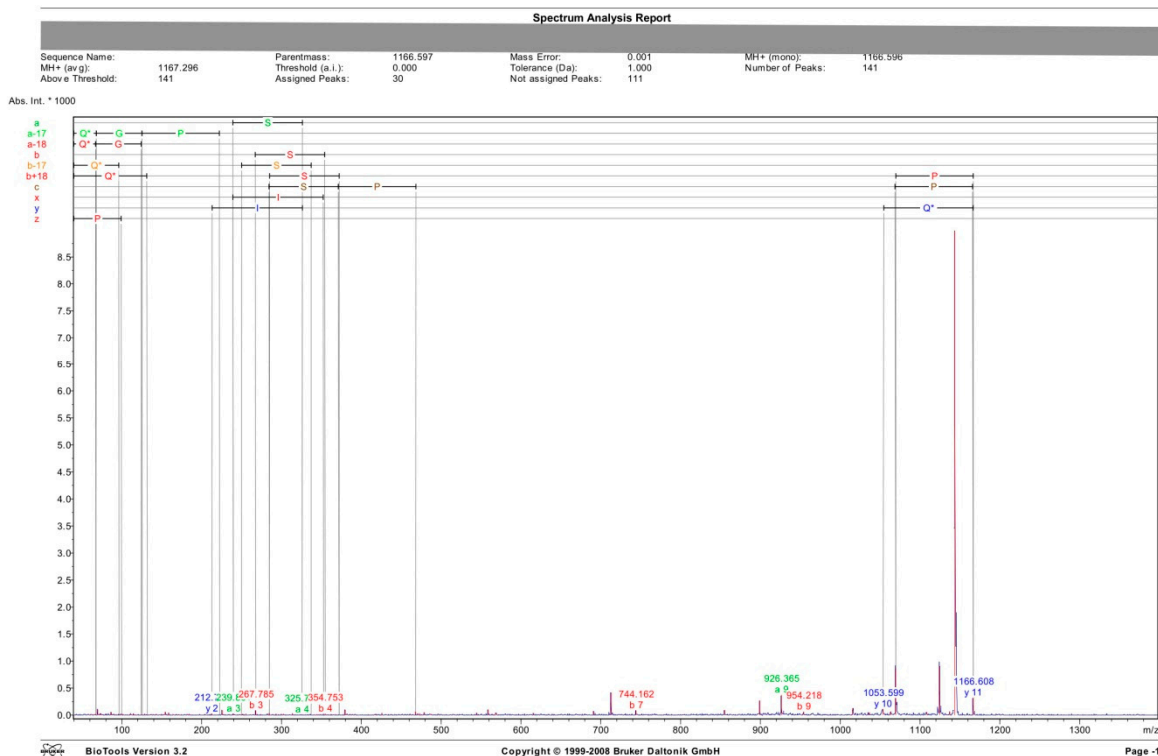

**Spectrum Analysis Report**

Display Parameter: Parentmass: 1166.597 Mass Error: 0.001 MH+ (mono): 1166.596 MH+ (avg): 1167.296  
 Threshold (a.i.): 0.000 Tolerance (Da): 1.000 Number of Peaks: 141 Above Threshold: 141  
 Assigned Peaks: 30 Not assigned Peaks: 111

**Peaklist:**

| Peak | Mass     | Intensity | Peak | Mass     | Intensity | Peak | Mass     | Intensity | Peak | Mass     | Intensity | Peak | Mass     | Intensity |
|------|----------|-----------|------|----------|-----------|------|----------|-----------|------|----------|-----------|------|----------|-----------|
| 1    | 59.306   | 9.477     | 2    | 60.819   | 12.672    | 3    | 63.192   | 13.250    | 4    | 65.591   | 10.865    | 5    | 67.492   | 14.744    |
| 6    | 69.794   | 107.891   | 7    | 72.735   | 14.595    | 8    | 74.072   | 31.349    | 9    | 80.464   | 23.295    | 10   | 86.752   | 65.381    |
| 11   | 89.890   | 19.272    | 12   | 93.690   | 12.222    | 13   | 96.577   | 21.788    | 14   | 99.775   | 23.860    | 15   | 101.639  | 16.087    |
| 16   | 104.836  | 6.643     | 17   | 107.141  | 8.810     | 18   | 110.296  | 14.562    | 19   | 111.579  | 22.022    | 20   | 114.775  | 26.071    |
| 21   | 119.736  | 9.138     | 22   | 121.276  | 10.065    | 23   | 123.918  | 8.984     | 24   | 125.231  | 7.220     | 25   | 128.773  | 23.393    |
| 26   | 131.859  | 10.166    | 27   | 137.308  | 11.730    | 28   | 138.874  | 12.022    | 29   | 140.924  | 10.460    | 30   | 143.727  | 14.871    |
| 31   | 146.646  | 4.862     | 32   | 147.852  | 7.474     | 33   | 150.586  | 18.429    | 34   | 154.751  | 58.099    | 35   | 158.793  | 42.149    |
| 36   | 163.839  | 14.872    | 37   | 168.092  | 12.050    | 38   | 168.616  | 16.150    | 39   | 171.840  | 9.737     | 40   | 174.796  | 12.252    |
| 41   | 178.788  | 10.726    | 42   | 182.080  | 16.000    | 43   | 184.415  | 21.672    | 44   | 191.968  | 3.602     | 45   | 194.752  | 5.752     |
| 46   | 197.799  | 15.471    | 47   | 204.293  | 16.232    | 48   | 210.766  | 14.742    | 49   | 212.778  | 26.646    | 50   | 217.278  | 3.860     |
| 51   | 222.439  | 7.715     | 52   | 225.803  | 93.920    | 53   | 229.525  | 10.306    | 54   | 234.758  | 12.763    | 55   | 239.801  | 27.276    |
| 56   | 243.095  | 8.438     | 57   | 244.869  | 9.338     | 58   | 247.779  | 10.010    | 59   | 249.514  | 11.025    | 60   | 251.893  | 17.873    |
| 61   | 255.449  | 24.211    | 62   | 259.659  | 4.572     | 63   | 261.147  | 7.694     | 64   | 264.568  | 9.143     | 65   | 267.785  | 88.442    |
| 66   | 271.496  | 8.291     | 67   | 274.164  | 15.231    | 68   | 282.755  | 25.038    | 69   | 284.817  | 35.509    | 70   | 289.182  | 10.270    |
| 71   | 290.786  | 10.666    | 72   | 293.353  | 20.017    | 73   | 296.826  | 11.260    | 74   | 300.105  | 18.600    | 75   | 301.579  | 10.885    |
| 76   | 302.979  | 15.553    | 77   | 305.759  | 9.271     | 78   | 313.820  | 30.259    | 79   | 317.909  | 16.344    | 80   | 325.769  | 11.124    |
| 81   | 329.291  | 6.289     | 82   | 333.557  | 11.213    | 83   | 337.154  | 5.382     | 84   | 341.743  | 9.032     | 85   | 343.940  | 12.481    |
| 86   | 345.709  | 12.821    | 87   | 348.057  | 14.205    | 88   | 350.480  | 11.895    | 89   | 352.783  | 15.326    | 90   | 354.753  | 28.913    |
| 91   | 357.907  | 6.745     | 92   | 359.711  | 8.221     | 93   | 362.807  | 15.377    | 94   | 365.359  | 6.978     | 95   | 367.499  | 12.685    |
| 96   | 369.749  | 7.658     | 97   | 372.150  | 10.255    | 98   | 377.259  | 13.995    | 99   | 379.863  | 100.028   | 100  | 382.451  | 21.046    |
| 101  | 386.128  | 17.533    | 102  | 393.005  | 14.002    | 103  | 406.667  | 9.814     | 104  | 413.921  | 9.633     | 105  | 416.950  | 9.496     |
| 106  | 418.841  | 19.720    | 107  | 425.878  | 38.938    | 108  | 431.922  | 12.020    | 109  | 441.857  | 14.626    | 110  | 461.885  | 17.502    |
| 111  | 467.923  | 68.734    | 112  | 470.973  | 26.134    | 113  | 473.070  | 26.235    | 114  | 473.000  | 52.465    | 115  | 496.868  | 17.069    |
| 116  | 488.073  | 17.149    | 117  | 496.675  | 22.120    | 118  | 515.991  | 15.538    | 119  | 544.879  | 43.826    | 120  | 558.947  | 102.705   |
| 121  | 564.157  | 19.419    | 122  | 568.011  | 45.699    | 123  | 566.942  | 19.333    | 124  | 616.065  | 35.577    | 125  | 691.245  | 71.120    |
| 128  | 713.091  | 418.548   | 129  | 744.162  | 87.912    | 130  | 855.207  | 98.162    | 131  | 889.272  | 273.492   | 132  | 926.365  | 378.152   |
| 131  | 954.218  | 66.567    | 132  | 1015.370 | 129.188   | 133  | 1035.437 | 54.592    | 134  | 1053.599 | 114.444   | 135  | 1063.265 | 68.583    |
| 136  | 1069.531 | 860.630   | 137  | 1108.719 | 51.857    | 138  | 1124.650 | 909.722   | 139  | 1137.283 | 62.850    | 140  | 1143.502 | 9274.172  |
| 141  | 1166.608 | 324.549   |      |          |           |      |          |           |      |          |           |      |          |           |

**Calculated Masses:**  
 GQSPRRHPIPP N-Term: Gln->pyro-Glu (N-term Q) 1: Deamidated (NQ)

| N-Term | Ion | a        | a-17     | a-18     | b        | b-17     | b-18     | b+18     | c        | i       | x        | y        | z        | C-Term | Ion |
|--------|-----|----------|----------|----------|----------|----------|----------|----------|----------|---------|----------|----------|----------|--------|-----|
| 1      | Q'  | 85.028   | 68.002   | 67.018   | 113.023  | 95.997   | 95.013   | 131.034  | 130.050  | 85.028  | 142.050  | 116.071  | 99.044   | 11     | P   |
| 2      | G   | 142.050  | 125.023  | 124.039  | 170.045  | 153.018  | 152.034  | 188.055  | 187.071  | 30.034  | 239.103  | 213.123  | 196.097  | 10     | P   |
| 3      | P   | 239.103  | 222.076  | 221.092  | 267.098  | 250.071  | 249.087  | 285.108  | 284.124  | 70.065  | 352.187  | 326.207  | 309.181  | 9      | I   |
| 4      | S   | 326.135  | 309.108  | 308.124  | 354.130  | 337.103  | 336.119  | 372.140  | 371.156  | 60.044  | 449.239  | 423.260  | 406.234  | 8      | P   |
| 5      | P   | 423.167  | 406.141  | 405.157  | 451.162  | 434.136  | 433.152  | 469.169  | 468.185  | 70.065  | 536.268  | 510.289  | 493.263  | 7      | H   |
| 6      | R   | 579.289  | 562.262  | 561.278  | 607.283  | 590.257  | 589.273  | 625.294  | 624.310  | 129.113 | 742.399  | 716.420  | 699.394  | 6      | R   |
| 7      | H   | 716.347  | 699.321  | 698.337  | 744.342  | 727.316  | 726.332  | 762.353  | 761.369  | 110.071 | 839.452  | 813.473  | 796.446  | 5      | P   |
| 8      | P   | 813.400  | 796.374  | 795.390  | 841.395  | 824.369  | 823.385  | 859.406  | 858.422  | 70.065  | 928.484  | 902.505  | 885.478  | 4      | S   |
| 9      | I   | 926.484  | 909.458  | 908.474  | 954.479  | 937.453  | 936.469  | 972.490  | 971.506  | 86.096  | 1023.537 | 997.558  | 980.531  | 3      | P   |
| 10     | P   | 1023.537 | 1006.510 | 1005.526 | 1051.532 | 1034.505 | 1033.521 | 1069.543 | 1068.559 | 70.065  | 1080.559 | 1054.579 | 1037.553 | 2      | G   |
| 11     | P   | 1120.590 | 1103.563 | 1102.579 | 1148.585 | 1131.558 | 1130.574 | 1166.596 | 1165.611 | 70.065  | 1192.575 | 1166.595 | 1149.569 | 1      | Q'  |

BioTools Version 3.2 Copyright © 1999-2008 Bruker Daltonik GmbH Page 2-

### Annotated MS/MS spectrum of peptide 1182.573 m/z.

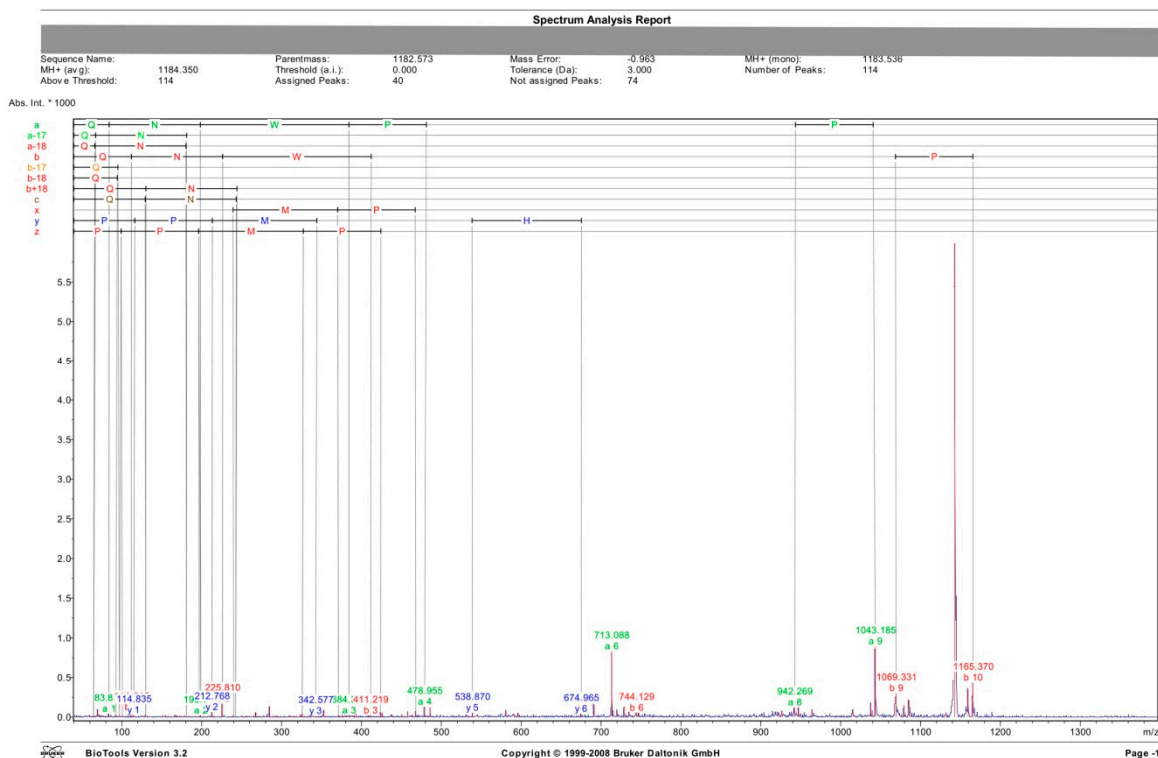

**Spectrum Analysis Report**

|                    |          |                     |        |                  |          |                  |          |
|--------------------|----------|---------------------|--------|------------------|----------|------------------|----------|
| Display Parameter: | 1182.573 | Mass Error:         | -0.963 | MH+ (mono):      | 1183.536 | MH+ (avg):       | 1184.350 |
| Parentmass:        | 1182.573 | Threshold (a.i.):   | 0.000  | Tolerance (Da):  | 3.000    | Number of Peaks: | 114      |
| Assigned Peaks:    | 40       | Not assigned Peaks: | 74     | Above Threshold: | 114      |                  |          |

**Peaklist:**

| Peak | Mass     | Intensity | Peak | Mass     | Intensity | Peak | Mass     | Intensity | Peak | Mass     | Intensity | Peak | Mass     | Intensity |
|------|----------|-----------|------|----------|-----------|------|----------|-----------|------|----------|-----------|------|----------|-----------|
| 1    | 59.738   | 21.980    | 2    | 64.404   | 16.865    | 3    | 69.812   | 97.501    | 4    | 72.703   | 25.033    | 5    | 76.280   | 18.907    |
| 6    | 83.811   | 41.387    | 7    | 92.307   | 24.307    | 8    | 96.871   | 22.822    | 9    | 100.545  | 15.285    | 10   | 106.858  | 14.858    |
| 11   | 109.394  | 13.614    | 12   | 111.812  | 63.484    | 13   | 114.835  | 25.033    | 14   | 124.833  | 16.267    | 15   | 129.757  | 27.579    |
| 16   | 150.834  | 25.776    | 17   | 154.739  | 21.785    | 18   | 157.421  | 13.107    | 19   | 158.703  | 12.724    | 20   | 166.723  | 24.038    |
| 21   | 189.747  | 18.031    | 22   | 172.653  | 16.502    | 23   | 178.184  | 7.771     | 24   | 178.743  | 16.026    | 25   | 180.986  | 10.892    |
| 26   | 182.831  | 9.146     | 27   | 184.791  | 10.458    | 28   | 191.772  | 9.801     | 29   | 194.649  | 7.196     | 30   | 196.760  | 10.018    |
| 31   | 198.755  | 18.971    | 32   | 203.255  | 9.517     | 33   | 212.788  | 62.957    | 34   | 215.064  | 11.132    | 35   | 216.774  | 9.273     |
| 36   | 220.819  | 8.188     | 37   | 225.810  | 169.455   | 38   | 239.813  | 18.922    | 39   | 242.339  | 8.540     | 40   | 250.796  | 17.038    |
| 41   | 256.062  | 11.499    | 42   | 260.091  | 11.694    | 43   | 261.330  | 7.446     | 44   | 262.802  | 8.699     | 45   | 267.788  | 59.656    |
| 46   | 273.543  | 10.665    | 47   | 277.796  | 19.836    | 48   | 284.825  | 136.202   | 49   | 289.781  | 15.045    | 50   | 293.566  | 16.500    |
| 51   | 295.860  | 10.991    | 52   | 303.815  | 11.872    | 53   | 309.787  | 18.137    | 54   | 311.819  | 16.756    | 55   | 315.431  | 13.160    |
| 56   | 318.123  | 14.283    | 57   | 319.546  | 13.868    | 58   | 323.850  | 27.902    | 59   | 325.839  | 40.297    | 60   | 329.232  | 12.764    |
| 61   | 332.837  | 16.472    | 62   | 335.803  | 25.663    | 63   | 339.318  | 18.929    | 64   | 342.577  | 15.475    | 65   | 346.276  | 20.762    |
| 66   | 349.781  | 17.153    | 67   | 352.824  | 91.071    | 68   | 371.238  | 15.884    | 69   | 373.339  | 18.414    | 70   | 376.311  | 33.532    |
| 71   | 379.879  | 115.441   | 72   | 384.336  | 18.710    | 73   | 386.670  | 33.673    | 74   | 389.739  | 48.834    | 75   | 393.272  | 40.403    |
| 76   | 408.888  | 24.178    | 77   | 411.219  | 18.903    | 78   | 423.859  | 58.021    | 79   | 425.818  | 52.234    | 80   | 437.816  | 31.965    |
| 81   | 450.851  | 31.421    | 82   | 457.859  | 71.444    | 83   | 463.975  | 26.964    | 84   | 467.840  | 79.866    | 85   | 478.955  | 130.080   |
| 86   | 485.876  | 126.566   | 87   | 531.686  | 29.667    | 88   | 538.870  | 54.170    | 89   | 580.896  | 79.638    | 90   | 591.075  | 39.147    |
| 91   | 596.019  | 53.026    | 92   | 674.965  | 40.964    | 93   | 691.134  | 159.833   | 94   | 713.088  | 829.701   | 95   | 719.963  | 84.034    |
| 96   | 729.025  | 134.443   | 97   | 735.094  | 66.562    | 98   | 744.129  | 54.103    | 99   | 747.049  | 56.575    | 100  | 822.263  | 67.406    |
| 101  | 926.563  | 80.644    | 102  | 942.269  | 121.769   | 103  | 947.260  | 123.777   | 104  | 964.168  | 98.663    | 105  | 1015.269 | 95.083    |
| 106  | 1037.379 | 181.966   | 107  | 1043.185 | 891.816   | 108  | 1069.331 | 300.911   | 109  | 1079.170 | 148.409   | 110  | 1085.424 | 215.995   |
| 111  | 1132.158 | 60.423    | 112  | 1142.852 | 6034.370  | 113  | 1159.254 | 346.867   | 114  | 1165.370 | 433.160   |      |          |           |

**Calculated Masses:**  
GNWPHPPMPP N-Term: Gln-pyro-Glu (N-term Q)

| N-Term | Ion | a        | a-17     | a-18     | b        | b-17     | b-18     | b+18     | c        | l       | x        | y        | z        | C-Term | Ion |
|--------|-----|----------|----------|----------|----------|----------|----------|----------|----------|---------|----------|----------|----------|--------|-----|
| 1      | Q   | 84.044   | 67.018   | 66.034   | 112.039  | 95.013   | 94.029   | 139.050  | 129.066  | 84.044  | 142.050  | 116.071  | 99.044   | 10     | P   |
| 2      | N   | 198.087  | 181.061  | 180.077  | 226.082  | 209.056  | 208.072  | 244.093  | 243.109  | 87.055  | 239.103  | 213.123  | 196.097  | 9      | P   |
| 3      | W   | 384.167  | 367.140  | 366.156  | 412.162  | 395.135  | 394.151  | 430.172  | 429.188  | 159.092 | 370.143  | 344.164  | 327.137  | 8      | M   |
| 4      | P   | 481.219  | 464.193  | 463.209  | 509.214  | 492.188  | 491.204  | 527.225  | 526.241  | 70.065  | 487.196  | 441.217  | 424.190  | 7      | P   |
| 5      | H   | 618.278  | 601.252  | 600.268  | 646.273  | 629.247  | 628.263  | 664.284  | 663.300  | 110.071 | 564.249  | 538.269  | 521.243  | 6      | P   |
| 6      | P   | 715.331  | 698.305  | 697.321  | 743.326  | 726.299  | 725.315  | 761.337  | 760.353  | 70.065  | 701.308  | 675.328  | 658.302  | 5      | H   |
| 7      | P   | 812.384  | 795.357  | 794.373  | 840.379  | 823.352  | 822.368  | 858.389  | 857.405  | 70.065  | 798.360  | 772.381  | 755.355  | 4      | P   |
| 8      | M   | 943.424  | 926.398  | 925.414  | 971.419  | 954.393  | 953.409  | 989.430  | 988.446  | 104.093 | 984.440  | 958.460  | 941.434  | 3      | W   |
| 9      | P   | 1040.477 | 1023.451 | 1022.467 | 1068.472 | 1051.445 | 1050.461 | 1086.483 | 1085.499 | 70.065  | 1098.483 | 1072.503 | 1055.477 | 2      | N   |
| 10     | P   | 1137.530 | 1120.503 | 1119.519 | 1165.525 | 1148.498 | 1147.514 | 1183.535 | 1182.551 | 70.065  | 1209.515 | 1183.535 | 1166.509 | 1      | Q   |

BioTools Version 3.2 Copyright © 1999-2008 Bruker Daltonik GmbH Page -2-
